# Supplementary material
Source: PubMed Central journal article supplement (PMC9555732)
Supplement: MP-46-3582-s001.pdf [file MP-46-3582-s001.pdf]

| FLAIR - Semi-automatic rater 1 vs. rater 2 |                                      |                                    |                                              |                                               |                                 |                     |
|--------------------------------------------|--------------------------------------|------------------------------------|----------------------------------------------|-----------------------------------------------|---------------------------------|---------------------|
| Feature category                           | Feature Name                         | Differences                        | LRL [95% CI]                                 | Mean ± SD [95%]                               | URL [95%]                       | ICC [95% CI]        |
| Histogram                                  | Minimum                              | Absolute <sup>†</sup>              | -5.01e+01 [-5.90e+01 to -4.13e+01]           | -2.26e+00 ± 2.44e+01 [-7.37e+00 to 2.86e+00]  | 4.56e+01 [3.67e+01 to 5.44e+01] | 0.89 [0.83 to 0.93] |
|                                            |                                      | Percentage <sup>†</sup>            | -105.8 [-124.5 to -87.2]                     | -5.2 ± 51.4 [-15.9 to 5.6]                    | 95.5 [76.9 to 114.2]            |                     |
|                                            | Maximum                              | Absolute <sup>†</sup>              | -2.01e+02 [-2.35e+02 to -1.66e+02]           | -1.45e+01 ± 9.50e+01 [-3.44e+01 to 5.45e+00]  | 1.72e+02 [1.37e+02 to 2.06e+02] | 0.98 [0.98 to 0.99] |
|                                            |                                      | Percentage <sup>†</sup>            | -24.4 [-28.6 to -20.1]                       | -1.3 ± 11.8 [-3.8 to 1.1]                     | 21.7 [17.4 to 26.0]             |                     |
|                                            | Mean                                 | Absolute <sup>†</sup>              | -4.05e+01 [-4.77e+01 to -3.33e+01]           | -1.47e+00 ± 1.99e+01 [-5.64e+00 to 2.69e+00]  | 3.75e+01 [3.03e+01 to 4.47e+01] | 1.00 [1.00 to 1.00] |
|                                            |                                      | Percentage <sup>†</sup>            | -10.9 [-12.8 to -9.0]                        | -0.7 ± 5.2 [-1.8 to 0.3]                      | 9.4 [7.5 to 11.3]               |                     |
|                                            | Range                                | Absolute <sup>†</sup>              | -2.12e+02 [-2.49e+02 to -1.75e+02]           | -1.22e+01 ± 1.02e+02 [-3.36e+01 to 9.18e+00]  | 1.88e+02 [1.51e+02 to 2.25e+02] | 0.98 [0.97 to 0.99] |
|                                            |                                      | Percentage <sup>†</sup>            | -26.0 [-30.6 to -21.4]                       | -1.0 ± 12.8 [-3.6 to 1.7]                     | 24.1 [19.5 to 28.7]             |                     |
|                                            | Standard deviation                   | Absolute <sup>†</sup>              | -9.81e+00 [-1.16e+01 to -7.99e+00]           | 1.41e-02 ± 5.01e+00 [-1.04e+00 to 1.06e+00]   | 9.84e+00 [8.02e+00 to 1.17e+01] | 1.00 [1.00 to 1.00] |
|                                            |                                      | Percentage <sup>†</sup>            | -10.6 [-12.7 to -8.5]                        | 0.7 ± 5.7 [-0.5 to 1.9]                       | 11.9 [9.9 to 14.0]              |                     |
|                                            | Variance                             | Absolute <sup>†</sup>              | -2.53e+03 [-2.98e+03 to -2.08e+03]           | -1.02e+02 ± 1.24e+03 [-3.62e+02 to 1.58e+02]  | 2.33e+03 [1.88e+03 to 2.78e+03] | 1.00 [0.99 to 1.00] |
|                                            |                                      | Percentage <sup>†</sup>            | -21.1 [-25.3 to -17.0]                       | 1.3 ± 11.4 [-1.1 to 3.7]                      | 23.8 [19.6 to 27.9]             |                     |
|                                            | Median                               | Absolute <sup>†</sup>              | -4.96e+01 [-5.84e+01 to -4.08e+01]           | -2.12e+00 ± 2.42e+01 [-7.19e+00 to 2.95e+00]  | 4.53e+01 [3.66e+01 to 5.41e+01] | 1.00 [0.99 to 1.00] |
|                                            |                                      | Percentage <sup>†</sup>            | -13.2 [-15.4 to -10.9]                       | -1.0 ± 6.2 [-2.3 to 0.2]                      | 11.1 [8.8 to 13.3]              |                     |
|                                            | Skewness                             | Absolute <sup>†</sup>              | -4.34e-01 [-5.13e-01 to -3.56e-01]           | -1.24e-02 ± 2.15e-01 [-5.75e-02 to 3.28e-02]  | 4.10e-01 [3.32e-01 to 4.88e-01] | 0.98 [0.97 to 0.99] |
|                                            |                                      | Percentage <sup>†</sup>            | -415.4 [-487.3 to -343.5]                    | -26.9 ± 198.2 [-68.4 to 14.6]                 | 361.6 [289.6 to 433.5]          |                     |
|                                            | Kurtosis                             | Absolute <sup>†</sup>              | -2.47e+00 [-2.91e+00 to -2.03e+00]           | -1.05e-01 ± 1.21e+00 [-3.58e-01 to 1.47e-01]  | 2.26e+00 [1.82e+00 to 2.69e+00] | 0.95 [0.92 to 0.96] |
|                                            |                                      | Percentage <sup>†</sup>            | -463.3 [-550.3 to -376.3]                    | 6.7 ± 239.8 [-43.5 to 56.9]                   | 476.7 [389.7 to 563.7]          |                     |
|                                            | Root mean squared                    | Absolute <sup>†</sup>              | -3.88e+01 [-4.57e+01 to -3.19e+01]           | -1.41e+00 ± 1.91e+01 [-5.41e+00 to 2.58e+00]  | 3.60e+01 [2.91e+01 to 4.29e+01] | 1.00 [1.00 to 1.00] |
|                                            |                                      | Percentage <sup>†</sup>            | -10.1 [-11.8 to -8.3]                        | -0.7 ± 4.8 [-1.7 to 0.3]                      | 8.7 [7.0 to 10.5]               |                     |
|                                            | Energy                               | Absolute <sup>†</sup>              | -1.04e+10 [-1.25e+10 to -8.28e+09]           | 9.37e+08 ± 5.77e+09 [-2.71e+08 to 2.15e+09]   | 1.22e+10 [1.02e+10 to 1.43e+10] | 0.99 [0.98 to 0.99] |
|                                            |                                      | Percentage <sup>†</sup>            | -36.7 [-44.7 to -28.7]                       | 6.5 ± 22.0 [1.9 to 11.1]                      | 49.6 [41.6 to 57.6]             |                     |
|                                            | Mean absolute deviation              | Absolute <sup>†</sup>              | -8.13e+00 [-9.61e+00 to -6.65e+00]           | -1.44e-01 ± 4.07e+00 [-9.97e-01 to 7.09e-01]  | 7.84e+00 [6.36e+00 to 9.32e+00] | 1.00 [1.00 to 1.00] |
|                                            |                                      | Percentage <sup>†</sup>            | -12.6 [-15.0 to -10.2]                       | 0.4 ± 6.6 [-0.9 to 1.8]                       | 13.5 [11.1 to 15.9]             |                     |
|                                            | Median absolute deviation            | Absolute <sup>†</sup>              | -8.54e+00 [-1.01e+01 to -6.99e+00]           | -1.58e-01 ± 4.27e+00 [-1.05e+00 to 7.37e-01]  | 8.22e+00 [6.67e+00 to 9.77e+00] | 1.00 [0.99 to 1.00] |
|                                            |                                      | Percentage <sup>†</sup>            | -13.1 [-15.6 to -10.6]                       | 0.4 ± 6.9 [-1.0 to 1.9]                       | 13.9 [11.4 to 16.4]             |                     |
|                                            | 10 <sup>th</sup> percentile          | Absolute <sup>†</sup>              | -3.82e+01 [-4.52e+01 to -3.12e+01]           | -4.38e-01 ± 1.93e+01 [-4.47e+00 to 3.60e+00]  | 3.73e+01 [3.03e+01 to 4.43e+01] | 1.00 [0.99 to 1.00] |
|                                            |                                      | Percentage <sup>†</sup>            | -15.6 [-18.3 to -12.8]                       | -0.9 ± 7.5 [-2.5 to 0.6]                      | 13.7 [11.0 to 16.4]             |                     |
|                                            | 90 <sup>th</sup> percentile          | Absolute <sup>†</sup>              | -3.81e+01 [-4.52e+01 to -3.11e+01]           | -1.45e-01 ± 1.94e+01 [-4.21e+00 to 3.92e+00]  | 3.79e+01 [3.08e+01 to 4.49e+01] | 1.00 [1.00 to 1.00] |
|                                            |                                      | Percentage <sup>†</sup>            | -11.7 [-13.9 to -9.5]                        | 0.1 ± 6.0 [-1.2 to 1.3]                       | 11.9 [9.7 to 14.1]              |                     |
|                                            | Robust mean absolute deviation       | Absolute <sup>†</sup>              | -7.38e+00 [-8.69e+00 to -6.08e+00]           | -3.27e-01 ± 3.60e+00 [-1.08e+00 to 4.27e-01]  | 6.73e+00 [5.42e+00 to 8.03e+00] | 1.00 [0.99 to 1.00] |
|                                            |                                      | Percentage <sup>†</sup>            | -16.8 [-19.9 to -13.7]                       | 0.0 ± 8.6 [-1.8 to 1.8]                       | 16.8 [13.7 to 19.9]             |                     |
|                                            | Robust median absolute deviation     | Absolute <sup>†</sup>              | -7.64e+00 [-8.99e+00 to -6.29e+00]           | -3.34e-01 ± 3.73e+00 [-1.11e+00 to 4.47e-01]  | 6.97e+00 [5.62e+00 to 8.32e+00] | 1.00 [0.99 to 1.00] |
|                                            |                                      | Percentage <sup>†</sup>            | -17.3 [-20.5 to -14.1]                       | -0.0 ± 8.8 [-1.9 to 1.8]                      | 17.2 [14.0 to 20.4]             |                     |
|                                            | Interquartile range                  | Absolute <sup>†</sup>              | -2.01e+01 [-2.36e+01 to -1.66e+01]           | -1.08e+00 ± 9.70e+00 [-3.11e+00 to 9.56e-01]  | 1.79e+01 [1.44e+01 to 2.15e+01] | 0.99 [0.99 to 1.00] |
|                                            |                                      | Percentage <sup>†</sup>            | -18.3 [-21.7 to -15.0]                       | -0.5 ± 9.1 [-2.4 to 1.5]                      | 17.4 [14.1 to 20.7]             |                     |
|                                            | Coefficient of dispersion            | Absolute <sup>†</sup>              | -3.05e-02 [-3.62e-02 to -2.48e-02]           | 3.55e-04 ± 1.58e-02 [-2.94e-03 to 3.65e-03]   | 3.12e-02 [2.55e-02 to 3.69e-02] | 0.98 [0.97 to 0.99] |
| Percentage <sup>†</sup>                    |                                      | -19.7 [-23.4 to -16.0]             | 0.2 ± 10.2 [-1.9 to 2.4]                     | 20.2 [16.5 to 23.9]                           |                                 |                     |
| Coefficient of variation                   | Absolute <sup>†</sup>                | -4.04e-02 [-4.85e-02 to -3.23e-02] | 3.44e-03 ± 2.24e-02 [-1.24e-03 to 8.12e-03]  | 4.73e-02 [3.91e-02 to 5.54e-02]               | 0.98 [0.96 to 0.98]             |                     |
|                                            | Percentage <sup>†</sup>              | -15.7 [-18.9 to -12.5]             | 1.4 ± 8.7 [-0.4 to 3.2]                      | 18.5 [15.4 to 21.7]                           |                                 |                     |
| GLCM                                       | Energy                               | Absolute <sup>†</sup>              | -2.45e-04 [-2.92e-04 to -1.99e-04]           | 6.78e-06 ± 1.29e-04 [-2.01e-05 to 3.37e-05]   | 2.59e-04 [2.12e-04 to 3.05e-04] | 0.96 [0.94 to 0.97] |
|                                            |                                      | Percentage <sup>†</sup>            | -30.1 [-36.2 to -24.0]                       | 3.0 ± 16.9 [-0.6 to 6.5]                      | 36.1 [29.9 to 42.2]             |                     |
|                                            | Entropy                              | Absolute <sup>†</sup>              | -3.81e-01 [-4.46e-01 to -3.16e-01]           | -2.88e-02 ± 1.80e-01 [-6.65e-02 to 8.80e-03]  | 3.23e-01 [2.58e-01 to 3.89e-01] | 0.96 [0.94 to 0.98] |
|                                            |                                      | Percentage <sup>†</sup>            | -3.3 [-3.8 to -2.7]                          | -0.2 ± 1.5 [-0.6 to 0.1]                      | 2.8 [2.2 to 3.4]                |                     |
|                                            | Contrast                             | Absolute <sup>†</sup>              | -3.95e+01 [-4.64e+01 to -3.26e+01]           | -2.48e+00 ± 1.89e+01 [-6.44e+00 to 1.48e+00]  | 3.45e+01 [2.77e+01 to 4.14e+01] | 0.97 [0.95 to 0.98] |
|                                            |                                      | Percentage <sup>†</sup>            | -27.2 [-32.0 to -22.5]                       | -1.7 ± 13.0 [-4.4 to 1.1]                     | 23.9 [19.2 to 28.6]             |                     |
|                                            | Homogeneity                          | Absolute <sup>†</sup>              | -2.24e-02 [-2.70e-02 to -1.78e-02]           | 2.30e-03 ± 1.26e-02 [-3.40e-04 to 4.94e-03]   | 2.70e-02 [2.24e-02 to 3.15e-02] | 0.97 [0.95 to 0.98] |
|                                            |                                      | Percentage <sup>†</sup>            | -13.3 [-16.1 to -10.5]                       | 1.8 ± 7.7 [0.1 to 3.4]                        | 16.9 [14.1 to 19.7]             |                     |
|                                            | Correlation                          | Absolute <sup>†</sup>              | -2.46e-02 [-2.91e-02 to -2.01e-02]           | -4.46e-04 ± 1.23e-02 [-3.03e-03 to 2.13e-03]  | 2.37e-02 [1.92e-02 to 2.82e-02] | 0.98 [0.97 to 0.99] |
|                                            |                                      | Percentage <sup>†</sup>            | -2.9 [-3.4 to -2.3]                          | -0.1 ± 1.4 [-0.4 to 0.2]                      | 2.7 [2.2 to 3.3]                |                     |
|                                            | Dissimilarity                        | Absolute <sup>†</sup>              | -1.31e+00 [-1.53e+00 to -1.09e+00]           | -1.18e-01 ± 6.09e-01 [-2.45e-01 to 9.89e-03]  | 1.08e+00 [8.55e-01 to 1.30e+00] | 0.96 [0.94 to 0.98] |
|                                            |                                      | Percentage <sup>†</sup>            | -15.7 [-18.4 to -13.0]                       | -1.2 ± 7.4 [-2.8 to 0.3]                      | 13.2 [10.5 to 15.9]             |                     |
|                                            | Sum average                          | Absolute <sup>†</sup>              | -1.34e+01 [-1.59e+01 to -1.08e+01]           | 4.30e-01 ± 7.04e+00 [-1.04e+00 to 1.90e+00]   | 1.42e+01 [1.17e+01 to 1.68e+01] | 0.98 [0.97 to 0.99] |
|                                            |                                      | Percentage <sup>†</sup>            | -11.1 [-13.2 to -9.0]                        | 0.4 ± 5.9 [-0.8 to 1.6]                       | 11.9 [9.8 to 14.0]              |                     |
|                                            | Sum variance                         | Absolute <sup>†</sup>              | -5.51e+02 [-6.44e+02 to -4.58e+02]           | -4.73e+01 ± 2.57e+02 [-1.01e+02 to 6.50e+00]  | 4.56e+02 [3.63e+02 to 5.49e+02] | 0.98 [0.96 to 0.98] |
|                                            |                                      | Percentage <sup>†</sup>            | -21.5 [-25.2 to -17.8]                       | -1.6 ± 10.2 [-3.7 to 0.5]                     | 18.3 [14.6 to 22.0]             |                     |
|                                            | Sum entropy                          | Absolute <sup>†</sup>              | -1.79e-01 [-2.10e-01 to -1.48e-01]           | -1.07e-02 ± 8.60e-02 [-2.87e-02 to 7.33e-03]  | 1.58e-01 [1.27e-01 to 1.89e-01] | 0.97 [0.95 to 0.98] |
|                                            |                                      | Percentage <sup>†</sup>            | -2.4 [-2.8 to -2.0]                          | -0.1 ± 1.2 [-0.4 to 0.1]                      | 2.2 [1.7 to 2.6]                |                     |
|                                            | Cluster shade                        | Absolute <sup>†</sup>              | -4.70e+04 [-5.63e+04 to -3.78e+04]           | 2.77e+03 ± 2.54e+04 [-2.55e+03 to 8.10e+03]   | 5.26e+04 [4.34e+04 to 6.18e+04] | 0.97 [0.96 to 0.98] |
|                                            |                                      | Percentage <sup>†</sup>            | -622.3 [-729.4 to -515.2]                    | -43.9 ± 295.1 [-105.7 to 18.0]                | 534.6 [427.5 to 641.6]          |                     |
|                                            | Cluster prominence                   | Absolute <sup>†</sup>              | -5.36e+06 [-6.28e+06 to -4.43e+06]           | -3.70e+05 ± 2.54e+06 [-9.03e+05 to 1.63e+05]  | 4.62e+06 [3.69e+06 to 5.54e+06] | 0.98 [0.97 to 0.99] |
|                                            |                                      | Percentage <sup>†</sup>            | -25.6 [-29.9 to -21.2]                       | -2.0 ± 12.0 [-4.5 to 0.5]                     | 21.5 [17.1 to 25.9]             |                     |
|                                            | Harlick's correlation                | Absolute <sup>†</sup>              | -1.74e+08 [-2.02e+08 to -1.45e+08]           | -2.02e+07 ± 7.83e+07 [-3.66e+07 to -3.79e+06] | 1.33e+08 [1.05e+08 to 1.62e+08] | 0.95 [0.92 to 0.97] |
|                                            |                                      | Percentage <sup>†</sup>            | -59.6 [-69.6 to -49.5]                       | -5.3 ± 27.7 [-11.1 to 0.5]                    | 49.0 [39.0 to 59.1]             |                     |
|                                            | Joint maximum                        | Absolute <sup>†</sup>              | -9.33e-04 [-1.11e-03 to -7.52e-04]           | 4.64e-05 ± 5.00e-04 [-5.82e-05 to 1.51e-04]   | 1.03e-03 [8.45e-04 to 1.21e-03] | 0.97 [0.95 to 0.98] |
|                                            |                                      | Percentage <sup>†</sup>            | -16.9 [-20.1 to -13.6]                       | 0.8 ± 9.0 [-1.1 to 2.7]                       | 18.5 [15.2 to 21.8]             |                     |
|                                            | Joint average                        | Absolute <sup>†</sup>              | -6.68e+00 [-7.96e+00 to -5.41e+00]           | 2.15e-01 ± 3.52e+00 [-5.22e-01 to 9.52e-01]   | 7.11e+00 [5.84e+00 to 8.39e+00] | 0.98 [0.97 to 0.99] |
|                                            |                                      | Percentage <sup>†</sup>            | -11.1 [-13.2 to -9.0]                        | 0.4 ± 5.9 [-0.8 to 1.6]                       | 11.9 [9.8 to 14.0]              |                     |
|                                            | Joint variance                       | Absolute <sup>†</sup>              | -1.43e+02 [-1.67e+02 to -1.19e+02]           | -1.24e+01 ± 6.67e+01 [-2.64e+01 to 1.53e+00]  | 1.18e+02 [9.42e+01 to 1.43e+02] | 0.97 [0.96 to 0.98] |
|                                            |                                      | Percentage <sup>†</sup>            | -21.1 [-24.7 to -17.5]                       | -1.6 ± 10.0 [-3.7 to 0.5]                     | 18.0 [14.3 to 21.6]             |                     |
|                                            | Inverse difference                   | Absolute <sup>†</sup>              | -2.29e-02 [-2.76e-02 to -1.82e-02]           | 2.51e-03 ± 1.30e-02 [-2.06e-04 to 5.23e-03]   | 2.79e-02 [2.32e-02 to 3.26e-02] | 0.97 [0.95 to 0.98] |
|                                            |                                      | Percentage <sup>†</sup>            | -9.3 [-11.2 to -7.3]                         | 1.2 ± 5.3 [0.1 to 2.3]                        | 11.6 [9.7 to 13.6]              |                     |
|                                            | Normalized inverse difference        | Absolute <sup>†</sup>              | -6.82e-03 [-8.23e-03 to -5.42e-03]           | 7.84e-04 ± 3.88e-03 [-2.94e-05 to 1.60e-03]   | 8.39e-03 [6.98e-03 to 9.80e-03] | 0.96 [0.94 to 0.98] |
|                                            |                                      | Percentage <sup>†</sup>            | -0.7 [-0.9 to -0.6]                          | 0.1 ± 0.4 [-0.0 to 0.2]                       | 0.9 [0.7 to 1.0]                |                     |
|                                            | Normalized inverse difference moment | Absolute <sup>†</sup>              | -1.91e-03 [-2.30e-03 to -1.53e-03]           | 1.55e-04 ± 1.06e-03 [-6.60e-05 to 3.76e-04]   | 2.22e-03 [1.84e-03 to 2.61e-03] | 0.96 [0.95 to 0.98] |
|                                            |                                      | Percentage <sup>†</sup>            | -0.2 [-0.2 to -0.2]                          | 0.0 ± 0.1 [-0.0 to 0.0]                       | 0.2 [0.2 to 0.3]                |                     |
|                                            | Inverse variance                     | Absolute <sup>†</sup>              | -2.11e-02 [-2.55e-02 to -1.68e-02]           | 2.40e-03 ± 1.20e-02 [-1.14e-04 to 4.91e-03]   | 2.59e-02 [2.16e-02 to 3.03e-02] | 0.97 [0.95 to 0.98] |
| Percentage <sup>†</sup>                    |                                      | -13.4 [-16.3 to -10.6]             | 1.9 ± 7.8 [0.3 to 3.6]                       | 17.3 [14.4 to 20.1]                           |                                 |                     |
| Difference entropy                         | Absolute <sup>†</sup>                | -2.14e-01 [-2.51e-01 to -1.78e-01] | -1.65e-02 ± 1.01e-01 [-3.76e-02 to 4.66e-03] | 1.81e-01 [1.45e-01 to 2.18e-01]               | 0.97 [0.95 to 0.98]             |                     |
|                                            | Percentage <sup>†</sup>              | -4.8 [-5.6 to -4.0]                | -0.3 ± 2.3 [-0.8 to 0.1]                     | 4.1 [3.3 to 4.9]                              |                                 |                     |
| Difference variance                        | Absolute <sup>†</sup>                | -1.76e+01 [-2.08e+01 to -1.44e+01] | -2.25e-01 ± 8.87e+00 [-2.08e+00 to 1.63e+00] | 1.72e+01 [1.39e+01 to 2.04e+01]               | 0.97 [0.96 to 0.98]             |                     |
|                                            | Percentage <sup>†</sup>              | -25.1 [-29.6 to -20.6]             | -0.8 ± 12.4 [-3.4 to 1.8]                    | 23.6 [19.1 to 28.1]                           |                                 |                     |
| Difference average                         | Absolute <sup>†</sup>                | -1.31e+00 [-1.53e+00 to -1.09e+00] | -1.18e-01 ± 6.09e-01 [-2.45e-01 to 9.89e-03] | 1.08e+00 [8.55e-01 to 1.30e+00]               | 0.96 [0.94 to 0.98]             |                     |
|                                            | Percentage <sup>†</sup>              | -15.7 [-18.4 to -13.0]             | -1.2 ± 7.4 [-2.8 to 0.3]                     | 13.2 [10.5 to 15.9]                           |                                 |                     |
| Cluster tendency                           | Absolute <sup>†</sup>                | -5.51e+02 [-6.44e+02 to -4.58e+02] | -4.73e+01 ± 2.57e+02 [-1.01e+02 to 6.50e+00] | 4.56e+02 [3.63e+02 to 5.49e+02]               | 0.98 [0.96 to 0.98]             |                     |
|                                            | Percentage <sup>†</sup>              | -21.5 [-25.2 to -17.8]             | -1.6 ± 10.2 [-3.7 to 0.5]                    | 18.3 [14.6 to 22.0]                           |                                 |                     |
| Autocorrelation                            | Absolute <sup>†</sup>                | -8.79e+02 [-1.04e+03 to -7.14e+02] | 1.48e+01 ± 4.56e+02 [-8.07e+01 to 1.10e+02]  | 9.09e+02 [7.43e+02 to 1.07e+03]               | 0.98 [0.97 to 0.99]             |                     |
|                                            | Percentage <sup>†</sup>              | -18.8 [-22.4 to -15.2]             | 0.6 ± 9.9 [-1.5 to 2.7]                      | 20.0 [16.4 to 23.6]                           |                                 |                     |
| First measure of information correlation   | Absolute <sup>†</sup>                | -2.14e-02 [-2.51e-02 to -1.77e-02] | -1.35e-03 ± 1.02e-02 [-3.49e-03 to 7.96e-04] | 1.87e-02 [1.50e-02 to 2.24e-02]               | 0.98 [0.97 to 0.99]             |                     |
|                                            | Percentage <sup>†</sup>              | -9.9 [-11.8 to -7.9]               | 0.7 ± 5.4 [-0.4 to 1.8]                      | 11.2 [9.3 to 13.2]                            |                                 |                     |
| Second measure of information correlation  | Absolute <sup>†</sup>                | -1.22e-02 [-1.45e-02 to -9.81e-03] | 6.13e-04 ± 6.52e-03 [-7.53e-04 to 1.98e-03]  | 1.34e-02 [1.10e-02 to 1.58e-02]               | 0.98 [0.97 to 0.99]             |                     |
|                                            | Percentage <sup>†</sup>              | -1.3 [-1.6 to -1.1]                | 0.1 ± 0.7 [-0.1 to 0.2]                      | 1.4 [1.2 to 1.7]                              |                                 |                     |
| SAE                                        | Absolute <sup>†</sup>                | -2.90e-02 [-3.39e-02 to -2.41e-02] | -2.43e-03 ± 1.36e-02 [-5.27e-03 to 4.09e-04] | 2.42e-02 [1.92e-02 to 2.91e-02]               | 0.96 [0.94 to 0.97]             |                     |
|                                            | Percentage <sup>†</sup>              | -4.0 [-4.7 to -3.3]                | -0.3 ± 1.9 [-0.7 to 0.1]                     | 3.4 [2.7 to 4.0]                              |                                 |                     |
| LAE                                        | Absolute <sup>†</sup>                | -2.47e+02 [-2.94e+02 to -1.99e+02] | 9.80e+00 ± 1.31e+02 [-1.76e+01 to 3.72e+01]  | 2.66e+02 [2.19e+02 to 3.14e+02]               | 0.94 [0.91 to 0.96]             |                     |
|                                            | Percentage <sup>†</sup>              | -61.6 [-74.1 to -49.1]             | 6.1 ± 34.6 [-1.1 to 13.4]                    | 73.9 [61.3 to 86.4]                           |                                 |                     |
| GLN                                        | Absolute <sup>†</sup>                | -2.62e+02 [-3.17e+02 to -2.08e+02] | 3.21e+01 ± 1.50e+02 [6.87e-01 to 6.36e+01]   | 3.27e+02 [2.72e+02 to 3.81e+02]               | 0.96 [0.94 to 0.97]             |                     |
|                                            | Percentage <sup>†</sup>              | -46.4 [-56.3 to -36.4]             | 7.6 ± 27.5 [1.8 to 13.3]                     | 61                                            |                                 |                     |

|          |                         |                                    |                                              |                                 |                     |
|----------|-------------------------|------------------------------------|----------------------------------------------|---------------------------------|---------------------|
| ZP       | Absolute <sup>†</sup>   | -6.55e-02 [-7.64e-02 to -5.45e-02] | -6.32e-03 ± 3.02e-02 [-1.26e-02 to 2.41e-06] | 5.29e-02 [4.19e-02 to 6.38e-02] |                     |
|          | Percentage <sup>†</sup> | -13.6 [-15.9 to -11.3]             | -1.1 ± 6.4 [-2.4 to 0.3]                     | 11.4 [9.1 to 13.7]              | 0.97 [0.95 to 0.98] |
| LGLZE    | Absolute <sup>†</sup>   | -1.34e-03 [-1.58e-03 to -1.10e-03] | -2.71e-05 ± 6.69e-04 [-1.67e-04 to 1.13e-04] | 1.28e-03 [1.04e-03 to 1.53e-03] |                     |
|          | Percentage <sup>†</sup> | -44.2 [-52.3 to -36.2]             | -0.7 ± 22.2 [-5.3 to 4.0]                    | 42.9 [34.8 to 51.0]             | 0.93 [0.89 to 0.95] |
| HGLZE    | Absolute <sup>†</sup>   | -7.66e+02 [-9.10e+02 to -6.22e+02] | 1.13e+01 ± 3.96e+02 [-7.17e+01 to 9.43e+01]  | 7.88e+02 [6.45e+02 to 9.32e+02] |                     |
|          | Percentage <sup>†</sup> | -16.3 [-19.4 to -13.2]             | 0.5 ± 8.6 [-1.3 to 2.3]                      | 17.2 [14.1 to 20.3]             | 0.98 [0.96 to 0.98] |
| SALGLE   | Absolute <sup>†</sup>   | -8.01e-04 [-9.46e-04 to -6.55e-04] | -1.46e-05 ± 4.01e-04 [-9.86e-05 to 6.93e-05] | 7.71e-04 [6.26e-04 to 9.17e-04] |                     |
|          | Percentage <sup>†</sup> | -44.9 [-53.1 to -36.7]             | -0.6 ± 22.6 [-5.4 to 4.1]                    | 43.6 [35.4 to 51.8]             | 0.93 [0.89 to 0.95] |
| SAHGLE   | Absolute <sup>†</sup>   | -5.30e+02 [-6.27e+02 to -4.33e+02] | -7.21e+00 ± 2.67e+02 [-6.31e+01 to 4.86e+01] | 5.15e+02 [4.19e+02 to 6.12e+02] |                     |
|          | Percentage <sup>†</sup> | -16.1 [-19.1 to -13.1]             | 0.1 ± 8.2 [-1.7 to 1.8]                      | 16.2 [13.2 to 19.2]             | 0.98 [0.97 to 0.99] |
| LALGLE   | Absolute <sup>†</sup>   | -8.03e+00 [-9.53e+00 to -6.54e+00] | 3.02e-02 ± 4.11e+00 [-8.32e-01 to 8.92e-01]  | 8.10e+00 [6.60e+00 to 9.59e+00] |                     |
|          | Percentage <sup>†</sup> | -97.8 [-116.9 to -78.8]            | 5.3 ± 52.6 [-5.7 to 16.3]                    | 108.5 [89.4 to 127.6]           | 0.88 [0.82 to 0.92] |
| LAHGLE   | Absolute <sup>†</sup>   | -4.72e+05 [-5.63e+05 to -3.81e+05] | 1.97e+04 ± 2.51e+05 [-3.28e+04 to 7.22e+04]  | 5.11e+05 [4.20e+05 to 6.02e+05] |                     |
|          | Percentage <sup>†</sup> | -54.0 [-65.3 to -42.6]             | 7.3 ± 31.3 [0.8 to 13.9]                     | 68.7 [57.3 to 80.0]             | 1.00 [1.00 to 1.00] |
| GLV      | Absolute <sup>†</sup>   | -1.19e+02 [-1.39e+02 to -9.83e+01] | -8.58e+00 ± 5.62e+01 [-2.03e+01 to 3.18e+00] | 1.01e+02 [8.11e+01 to 1.22e+02] |                     |
|          | Percentage <sup>†</sup> | -17.2 [-20.1 to -14.2]             | -1.2 ± 8.1 [-2.9 to 0.5]                     | 14.8 [11.8 to 17.7]             | 0.97 [0.95 to 0.98] |
| SZV      | Absolute <sup>†</sup>   | -2.46e+02 [-2.93e+02 to -1.98e+02] | 9.72e+00 ± 1.30e+02 [-1.76e+01 to 3.70e+01]  | 2.65e+02 [2.18e+02 to 3.12e+02] |                     |
|          | Percentage <sup>†</sup> | -66.8 [-80.6 to -53.0]             | 7.6 ± 38.0 [-0.3 to 15.6]                    | 82.0 [68.3 to 95.8]             | 0.94 [0.91 to 0.96] |
| Mean     | Absolute <sup>†</sup>   | -3.29e+01 [-3.92e+01 to -2.67e+01] | 7.91e-01 ± 1.72e+01 [-2.81e+00 to 4.39e+00]  | 3.45e+01 [2.83e+01 to 4.07e+01] |                     |
|          | Percentage <sup>†</sup> | -14.5 [-17.3 to -11.8]             | 0.4 ± 7.6 [-1.2 to 2.0]                      | 15.3 [12.5 to 18.0]             | 0.99 [0.99 to 0.99] |
| SD       | Absolute <sup>†</sup>   | -2.88e+01 [-3.45e+01 to -2.32e+01] | 1.70e+00 ± 1.56e+01 [-1.56e+00 to 4.97e+00]  | 3.22e+01 [2.66e+01 to 3.79e+01] |                     |
|          | Percentage <sup>†</sup> | -15.7 [-18.8 to -12.5]             | 1.3 ± 8.7 [-0.5 to 3.1]                      | 18.3 [15.2 to 21.4]             | 0.99 [0.99 to 1.00] |
| Skewness | Absolute <sup>†</sup>   | -6.03e-01 [-7.14e-01 to -4.92e-01] | -4.50e-03 ± 3.05e-01 [-6.85e-02 to 5.95e-02] | 5.94e-01 [4.83e-01 to 7.05e-01] |                     |
|          | Percentage <sup>†</sup> | -27.9 [-33.0 to -22.7]             | -0.1 ± 14.2 [-3.1 to 2.8]                    | 27.6 [22.5 to 32.8]             | 0.95 [0.92 to 0.97] |
| Kurtosis | Absolute <sup>†</sup>   | -6.24e+00 [-7.36e+00 to -5.12e+00] | -1.95e-01 ± 3.08e+00 [-8.41e-01 to 4.51e-01] | 5.85e+00 [4.73e+00 to 6.97e+00] |                     |
|          | Percentage <sup>†</sup> | -47.9 [-56.4 to -39.5]             | -2.4 ± 23.2 [-7.3 to 2.5]                    | 43.1 [34.7 to 51.6]             | 0.92 [0.88 to 0.95] |
| Mean     | Absolute <sup>†</sup>   | -2.14e-02 [-2.53e-02 to -1.75e-02] | -2.57e-04 ± 1.08e-02 [-2.52e-03 to 2.00e-03] | 2.09e-02 [1.70e-02 to 2.48e-02] |                     |
|          | Percentage <sup>†</sup> | -11.0 [-13.0 to -9.0]              | -0.2 ± 5.5 [-1.4 to 1.0]                     | 10.6 [8.6 to 12.6]              | 0.99 [0.98 to 0.99] |
| SD       | Absolute <sup>†</sup>   | -1.62e-02 [-1.91e-02 to -1.33e-02] | -3.15e-04 ± 8.11e-03 [-2.01e-03 to 1.38e-03] | 1.56e-02 [1.26e-02 to 1.85e-02] |                     |
|          | Percentage <sup>†</sup> | -4.2 [-5.0 to -3.5]                | -0.1 ± 2.1 [-0.5 to 0.4]                     | 4.1 [3.3 to 4.8]                | 0.98 [0.98 to 0.99] |
| Skewness | Absolute <sup>†</sup>   | -1.70e-01 [-2.02e-01 to -1.38e-01] | 3.40e-03 ± 8.86e-02 [-1.52e-02 to 2.20e-02]  | 1.77e-01 [1.45e-01 to 2.09e-01] |                     |
|          | Percentage <sup>†</sup> | -11.3 [-13.5 to -9.2]              | 0.1 ± 5.8 [-1.1 to 1.3]                      | 11.6 [9.5 to 13.7]              | 0.98 [0.97 to 0.99] |
| Kurtosis | Absolute <sup>†</sup>   | -5.76e-01 [-6.85e-01 to -4.66e-01] | 1.45e-02 ± 3.01e-01 [-4.85e-02 to 7.76e-02]  | 6.05e-01 [4.96e-01 to 7.14e-01] |                     |
|          | Percentage <sup>†</sup> | -15.0 [-17.8 to -12.1]             | 0.3 ± 7.8 [-1.4 to 1.9]                      | 15.5 [12.7 to 18.3]             | 0.98 [0.97 to 0.99] |
| Mean     | Absolute <sup>†</sup>   | -2.92e+00 [-3.44e+00 to -2.40e+00] | -1.01e-01 ± 1.44e+00 [-4.03e-01 to 2.00e-01] | 2.72e+00 [2.20e+00 to 3.24e+00] |                     |
|          | Percentage <sup>†</sup> | -2.0 [-2.3 to -1.6]                | -0.1 ± 1.0 [-0.3 to 0.1]                     | 1.8 [1.5 to 2.2]                | 0.99 [0.99 to 1.00] |
| SD       | Absolute <sup>†</sup>   | -3.94e+00 [-4.70e+00 to -3.19e+00] | 1.33e-01 ± 2.08e+00 [-3.02e-01 to 5.69e-01]  | 4.21e+00 [3.45e+00 to 4.96e+00] |                     |
|          | Percentage <sup>†</sup> | -27.4 [-32.7 to -22.1]             | 1.1 ± 14.6 [-1.9 to 4.2]                     | 29.6 [24.4 to 34.9]             | 0.94 [0.91 to 0.96] |
| Skewness | Absolute <sup>†</sup>   | -7.69e-01 [-9.07e-01 to -6.31e-01] | -2.22e-02 ± 3.81e-01 [-1.02e-01 to 5.75e-02] | 7.24e-01 [5.86e-01 to 8.62e-01] |                     |
|          | Percentage <sup>†</sup> | -229.1 [-272.8 to -185.4]          | 7.1 ± 120.5 [-18.2 to 32.3]                  | 243.2 [199.5 to 287.0]          | 0.86 [0.78 to 0.91] |
| Kurtosis | Absolute <sup>†</sup>   | -2.94e+00 [-3.51e+00 to -2.38e+00] | 1.15e-01 ± 1.56e+00 [-2.12e-01 to 4.42e-01]  | 3.17e+00 [2.61e+00 to 3.74e+00] |                     |
|          | Percentage <sup>†</sup> | -44.2 [-52.8 to -35.5]             | 2.6 ± 23.9 [-2.4 to 7.6]                     | 49.4 [40.8 to 58.1]             | 0.79 [0.68 to 0.86] |
| Mean     | Absolute <sup>†</sup>   | -3.21e+00 [-3.79e+00 to -2.63e+00] | -6.12e-02 ± 1.61e+00 [-3.98e-01 to 2.75e-01] | 3.09e+00 [2.50e+00 to 3.67e+00] |                     |
|          | Percentage <sup>†</sup> | -2.1 [-2.5 to -1.7]                | -0.0 ± 1.1 [-0.3 to 0.2]                     | 2.1 [1.7 to 2.4]                | 0.99 [0.99 to 0.99] |
| SD       | Absolute <sup>†</sup>   | -4.90e+00 [-5.84e+00 to -3.96e+00] | 1.64e-01 ± 2.58e+00 [-3.77e-01 to 7.05e-01]  | 5.23e+00 [4.29e+00 to 6.16e+00] |                     |
|          | Percentage <sup>†</sup> | -31.9 [-38.1 to -25.6]             | 1.7 ± 17.1 [-1.9 to 5.3]                     | 35.2 [29.0 to 41.4]             | 0.92 [0.88 to 0.95] |
| Skewness | Absolute <sup>†</sup>   | -7.13e-01 [-8.41e-01 to -5.84e-01] | -1.84e-02 ± 3.54e-01 [-9.26e-02 to 5.57e-02] | 6.76e-01 [5.47e-01 to 8.04e-01] |                     |
|          | Percentage <sup>†</sup> | -901.0 [-1083.8 to -718.2]         | 86.7 ± 503.9 [-18.8 to 192.3]                | 1074.4 [891.6 to 1257.3]        | 0.87 [0.80 to 0.91] |
| Kurtosis | Absolute <sup>†</sup>   | -2.87e+00 [-3.39e+00 to -2.34e+00] | -3.54e-02 ± 1.44e+00 [-3.38e-01 to 2.67e-01] | 2.80e+00 [2.27e+00 to 3.32e+00] |                     |
|          | Percentage <sup>†</sup> | -44.7 [-53.0 to -36.4]             | 0.0 ± 22.8 [-4.8 to 4.8]                     | 44.8 [36.5 to 53.1]             | 0.76 [0.64 to 0.84] |
| Mean     | Absolute <sup>†</sup>   | -3.47e+00 [-4.09e+00 to -2.84e+00] | -9.35e-02 ± 1.72e+00 [-4.54e-01 to 2.67e-01] | 3.28e+00 [2.66e+00 to 3.91e+00] |                     |
|          | Percentage <sup>†</sup> | -2.3 [-2.7 to -1.9]                | -0.0 ± 1.2 [-0.3 to 0.2]                     | 2.2 [1.8 to 2.6]                | 0.99 [0.99 to 0.99] |
| SD       | Absolute <sup>†</sup>   | -5.05e+00 [-6.00e+00 to -4.09e+00] | 1.24e-01 ± 2.64e+00 [-4.29e-01 to 6.77e-01]  | 5.30e+00 [4.34e+00 to 6.25e+00] |                     |
|          | Percentage <sup>†</sup> | -31.4 [-37.4 to -25.4]             | 1.0 ± 16.6 [-2.4 to 4.5]                     | 33.5 [27.5 to 39.5]             | 0.92 [0.87 to 0.94] |
| Skewness | Absolute <sup>†</sup>   | -6.55e-01 [-7.76e-01 to -5.34e-01] | 1.14e-03 ± 3.35e-01 [-6.90e-02 to 7.13e-02]  | 6.57e-01 [5.36e-01 to 7.79e-01] |                     |
|          | Percentage <sup>†</sup> | -651.1 [-768.7 to -533.5]          | -15.9 ± 324.1 [-83.7 to 52.0]                | 619.4 [501.8 to 736.9]          | 0.90 [0.84 to 0.93] |
| Kurtosis | Absolute <sup>†</sup>   | -2.63e+00 [-3.11e+00 to -2.14e+00] | -3.42e-03 ± 1.34e+00 [-2.84e-01 to 2.77e-01] | 2.62e+00 [2.14e+00 to 3.11e+00] |                     |
|          | Percentage <sup>†</sup> | -40.2 [-47.7 to -32.7]             | 0.4 ± 20.7 [-3.9 to 4.8]                     | 41.1 [33.5 to 48.6]             | 0.82 [0.72 to 0.88] |
| Mean     | Absolute <sup>†</sup>   | -5.93e+00 [-7.01e+00 to -4.85e+00] | -7.95e-02 ± 2.98e+00 [-7.04e-01 to 5.45e-01] | 5.77e+00 [4.69e+00 to 6.85e+00] |                     |
|          | Percentage <sup>†</sup> | -4.1 [-4.9 to -3.4]                | -0.0 ± 2.1 [-0.5 to 0.4]                     | 4.1 [3.3 to 4.9]                | 0.97 [0.96 to 0.98] |
| SD       | Absolute <sup>†</sup>   | -4.99e+00 [-5.94e+00 to -4.04e+00] | 1.42e-01 ± 2.62e+00 [-4.06e-01 to 6.91e-01]  | 5.28e+00 [4.33e+00 to 6.23e+00] |                     |
|          | Percentage <sup>†</sup> | -30.7 [-36.6 to -24.8]             | 1.1 ± 16.2 [-2.3 to 4.5]                     | 32.8 [27.0 to 38.7]             | 0.93 [0.90 to 0.96] |
| Skewness | Absolute <sup>†</sup>   | -7.11e-01 [-8.43e-01 to -5.78e-01] | 5.80e-03 ± 3.65e-01 [-7.08e-02 to 8.23e-02]  | 7.22e-01 [5.90e-01 to 8.55e-01] |                     |
|          | Percentage <sup>†</sup> | -239.1 [-281.4 to -196.8]          | -10.6 ± 116.6 [-35.0 to 13.8]                | 217.9 [175.6 to 260.1]          | 0.90 [0.85 to 0.94] |
| Kurtosis | Absolute <sup>†</sup>   | -2.41e+00 [-2.85e+00 to -1.96e+00] | 1.68e-02 ± 1.24e+00 [-2.42e-01 to 2.76e-01]  | 2.44e+00 [1.99e+00 to 2.89e+00] |                     |
|          | Percentage <sup>†</sup> | -39.6 [-47.1 to -32.2]             | 0.6 ± 20.5 [-3.7 to 5.0]                     | 40.9 [33.5 to 48.4]             | 0.88 [0.82 to 0.92] |
| Mean     | Absolute <sup>†</sup>   | -2.59e+00 [-3.07e+00 to -2.12e+00] | -3.43e-02 ± 1.31e+00 [-3.08e-01 to 2.39e-01] | 2.52e+00 [2.05e+00 to 3.00e+00] |                     |
|          | Percentage <sup>†</sup> | -1.9 [-2.2 to -1.5]                | -0.0 ± 1.0 [-0.2 to 0.2]                     | 1.8 [1.5 to 2.2]                | 0.99 [0.99 to 0.99] |
| SD       | Absolute <sup>†</sup>   | -3.02e+00 [-3.60e+00 to -2.44e+00] | 1.12e-01 ± 1.60e+00 [-2.23e-01 to 4.47e-01]  | 3.24e+00 [2.66e+00 to 3.82e+00] |                     |
|          | Percentage <sup>†</sup> | -24.2 [-29.0 to -19.5]             | 1.5 ± 13.1 [-1.2 to 4.3]                     | 27.3 [22.5 to 32.0]             | 0.95 [0.93 to 0.97] |
| Skewness | Absolute <sup>†</sup>   | -7.85e-01 [-9.17e-01 to -6.52e-01] | -6.71e-02 ± 3.66e-01 [-1.44e-01 to 9.56e-03] | 6.50e-01 [5.18e-01 to 7.83e-01] |                     |
|          | Percentage <sup>†</sup> | -15624.3 [-18368.9 to -12879.7]    | -795.6 ± 7565.7 [-2380.2 to 789.0]           | 14033.2 [11288.5 to 16777.8]    | 0.87 [0.80 to 0.91] |
| Kurtosis | Absolute <sup>†</sup>   | -2.75e+00 [-3.31e+00 to -2.20e+00] | 2.49e-01 ± 1.53e+00 [-7.19e-02 to 5.69e-01]  | 3.25e+00 [2.69e+00 to 3.80e+00] |                     |
|          | Percentage <sup>†</sup> | -39.1 [-47.1 to -31.1]             | 3.9 ± 21.9 [-0.7 to 8.5]                     | 46.9 [38.9 to 54.9]             | 0.86 [0.79 to 0.91] |
| Mean     | Absolute <sup>†</sup>   | -3.04e+00 [-3.61e+00 to -2.47e+00] | 3.04e-02 ± 1.57e+00 [-2.98e-01 to 3.58e-01]  | 3.10e+00 [2.53e+00 to 3.67e+00] |                     |
|          | Percentage <sup>†</sup> | -2.1 [-2.6 to -1.7]                | 0.0 ± 1.1 [-0.2 to 0.3]                      | 2.2 [1.8 to 2.6]                | 0.99 [0.98 to 0.99] |
| SD       | Absolute <sup>†</sup>   | -4.13e+00 [-4.92e+00 to -3.34e+00] | 1.25e-01 ± 2.17e+00 [-3.29e-01 to 5.80e-01]  | 4.38e+00 [3.59e+00 to 5.17e+00] |                     |
|          | Percentage <sup>†</sup> | -32.2 [-38.6 to -25.9]             | 2.0 ± 17.5 [-1.7 to 5.6]                     | 36.2 [29.9 to 42.5]             | 0.92 [0.87 to 0.95] |
| Skewness | Absolute <sup>†</sup>   | -6.94e-01 [-8.18e-01 to -5.70e-01] | -2.55e-02 ± 3.41e-01 [-9.69e-02 to 4.60e-02] | 6.43e-01 [5.19e-01 to 7.67e-01] |                     |
|          | Percentage <sup>†</sup> | -10647.2 [-12766.2 to -8528.1]     | 801.8 ± 5841.3 [-421.6 to 2025.2]            | 12250.7 [10131.7 to 14369.8]    | 0.89 [0.83 to 0.93] |
| Kurtosis | Absolute <sup>†</sup>   | -3.37e+00 [-3.98e+00 to -2.76e+00] | -6.97e-02 ± 1.68e+00 [-4.22e-01 to 2.83e-01] | 3.23e+00 [2.62e+00 to 3.84e+00] |                     |
|          | Percentage <sup>†</sup> | -41.6 [-49.4 to -33.7]             | 0.8 ± 21.6 [-3.8 to 5.3]                     | 43.1 [35.2 to 50.9]             | 0.90 [0.85 to 0.93] |
| Mean     | Absolute <sup>†</sup>   | -3.17e+00 [-3.77e+00 to -2.58e+00] | 4.60e-02 ± 1.64e+00 [-2.98e-01 to 3.90e-01]  | 3.26e+00 [2.67e+00 to 3.86e+00] |                     |
|          | Percentage <sup>†</sup> | -2.3 [-2.7 to -1.8]                | 0.0 ± 1.2 [-0.2 to 0.3]                      | 2.4 [1.9 to 2.8]                | 0.99 [0.99 to 0.99] |
| SD       | Absolute <sup>†</sup>   | -4.17e+00 [-4.95e+00 to -3.39e+00] | 3.89e-02 ± 2.15e+00 [-4.11e-01 to 4.89e-01]  | 4.25e+00 [3.47e+00 to 5.03e+00] |                     |
|          | Percentage <sup>†</sup> | -30.3 [-36.1 to -24.5]             | 1.0 ± 16.0 [-2.4 to 4.3]                     | 32.2 [26.5 to 38.0]             | 0.92 [0.88 to 0.95] |
| Skewness | Absolute <sup>†</sup>   | -6.32e-01 [-7.51e-01 to -5.13e-01] | 1.30e-02 ± 3.29e-01 [-5.59e-02 to 8.19e-02]  | 6.58e-01 [5.39e-01 to 7.77e-01] |                     |
|          | Percentage <sup>†</sup> | -949.0 [-1114.6 to -783.5]         | -54.6 ± 456.3 [-150.2 to 41.0]               | 839.8 [674.3 to 1005.4]         | 0.91 [0.86 to 0.94] |
| Kurtosis | Absolute <sup>†</sup>   | -3.23e+00 [-3.82e+00 to -2.64e+00] | -6.15e-02 ± 1.62e+00 [-4.00e-01 to 2.77e-01] | 3.11e+00 [2.52e+00 to 3.69e+00] |                     |
|          | Percentage <sup>†</sup> | -43.7 [-51.8 to -35.5]             | 0.4 ± 22.5 [-4.3 to 5.1]                     | 44.5 [36.3 to 52.7]             | 0.84 [0.76 to 0.90] |
| Mean     | Absolute <sup>†</sup>   | -4.54e+00 [-5.38e+00 to -3.70e+00] | -1.23e-03 ± 2.32e+00 [-4.86e-01 to 4.84e-01] | 4.54e+00 [3.70e+00 to 5.38e+00] |                     |
|          | Percentage <sup>†</sup> | -3.4 [-4.0 to -2.7]                | 0.0 ± 1.7 [-0.3 to 0.4]                      | 3.4 [2.8 to 4.0]                | 0.97 [0.96 to 0.98] |
| SD       | Absolute <sup>†</sup>   | -3.23e+00 [-3.86e+00 to -2.61e+00] | 1.46e-01 ± 1.72e+00 [-2.15e-01 to 5.08e-01]  | 3.53e+00 [2.90e+00 to 4.15e+00] |                     |
|          | Percentage <sup>†</sup> | -24.2 [-29.0 to -19.4]             | 1.6 ± 13.2 [-1.2 to 4.3]                     | 27.4 [22.6 to 32.1]             | 0.95 [0.93 to 0.97] |
| Skewness | Absolute <sup>†</sup>   | -5.78e-01 [-6.80e-01 to -4.77e-01] | -3.09e-02 ± 2.79e-01 [-8.94e-02 to 2.76e-02] | 5.17e-01 [4.15e-01 to 6.18e-01] |                     |
|          | Percentage <sup>†</sup> | -161.3 [-192.1 to -130.5]          | 5.1 ± 84.9 [-12.7 to 22.9]                   | 171.5 [140.7 to 202.3]          | 0.92 [0.88 to 0.95] |
| Kurtosis | Absolute <sup>†</sup>   | -2.57e+00 [-3.09e+00 to -2.06e+00] | 2.12e-01 ± 1.42e+00 [-8.60e-02 to 5.09e-01]  | 3.00e+00 [2.48e+00 to 3.51e+00] |                     |
|          | Percentage <sup>†</sup> | -38.5 [-46.0 to -31.0]             | 2.1 ± 20.7 [-2.2 to                          |                                 |                     |

| Feature category                          | Feature Name                     | Differences                        | LRL [95% CI]                                  | Mean ± SD [95%]                               | URL [95%]                        | ICC [95% CI]        |
|-------------------------------------------|----------------------------------|------------------------------------|-----------------------------------------------|-----------------------------------------------|----------------------------------|---------------------|
| Histogram                                 | Minimum                          | Absolute <sup>†</sup>              | -3.89e+01 [-4.63e+01 to -3.15e+01]            | 9.33e-01 ± 2.03e+01 [-3.33e+00 to 5.19e+00]   | -3.89e+01 [4.08e+01 to 3.34e+01] | 0.90 [0.85 to 0.93] |
|                                           |                                  | Percentage <sup>†</sup>            | -122.7 [-145.2 to -100.3]                     | -1.5 ± 61.8 [-14.5 to 11.4]                   | 119.7 [97.3 to 142.1]            |                     |
|                                           | Maximum                          | Absolute <sup>†</sup>              | -5.06e+01 [-5.96e+01 to -4.15e+01]            | -1.80e+00 ± 2.49e+01 [-7.01e+00 to 3.41e+00]  | -5.06e+01 [4.70e+01 to 3.79e+01] | 1.00 [1.00 to 1.00] |
|                                           |                                  | Percentage <sup>†</sup>            | -4.5 [-5.4 to -3.7]                           | -0.2 ± 2.2 [-0.6 to 0.3]                      | 4.2 [3.4 to 5.0]                 |                     |
|                                           | Mean                             | Absolute <sup>†</sup>              | -2.92e+01 [-3.49e+01 to -2.35e+01]            | 1.56e+00 ± 1.57e+01 [-1.72e+00 to 4.85e+00]   | -2.92e+01 [3.23e+01 to 2.66e+01] | 1.00 [1.00 to 1.00] |
|                                           |                                  | Percentage <sup>†</sup>            | -7.5 [-8.9 to -6.1]                           | 0.1 ± 3.9 [-0.7 to 0.9]                       | 7.6 [6.2 to 9.0]                 |                     |
|                                           | Range                            | Absolute <sup>†</sup>              | -6.33e+01 [-7.45e+01 to -5.21e+01]            | -2.73e+00 ± 3.09e+01 [-9.20e+00 to 3.73e+00]  | -6.33e+01 [5.78e+01 to 4.66e+01] | 1.00 [1.00 to 1.00] |
|                                           |                                  | Percentage <sup>†</sup>            | -6.8 [-8.0 to -5.6]                           | -0.3 ± 3.3 [-1.0 to 0.4]                      | 6.2 [5.0 to 7.4]                 |                     |
|                                           | Standard deviation               | Absolute <sup>†</sup>              | -1.69e+01 [-1.97e+01 to -1.40e+01]            | -1.48e+00 ± 7.85e+00 [-3.13e+00 to 1.62e-01]  | -1.69e+01 [1.39e+01 to 1.11e+01] | 0.99 [0.99 to 1.00] |
|                                           |                                  | Percentage <sup>†</sup>            | -15.9 [-18.7 to -13.2]                        | -1.0 ± 7.6 [-2.6 to 0.6]                      | 13.9 [11.2 to 16.7]              |                     |
|                                           | Variance                         | Absolute <sup>†</sup>              | -5.22e+03 [-6.09e+03 to -4.34e+03]            | -5.03e+02 ± 2.40e+03 [-1.01e+03 to 4.65e-01]  | -5.22e+03 [4.21e+03 to 3.34e+03] | 0.99 [0.98 to 0.99] |
|                                           |                                  | Percentage <sup>†</sup>            | -31.6 [-37.0 to -26.1]                        | -2.0 ± 15.1 [-5.2 to 1.2]                     | 27.6 [22.1 to 33.0]              |                     |
|                                           | Median                           | Absolute <sup>†</sup>              | -2.82e+01 [-3.37e+01 to -2.27e+01]            | 1.50e+00 ± 1.52e+01 [-1.67e+00 to 4.68e+00]   | -2.82e+01 [3.12e+01 to 2.57e+01] | 1.00 [1.00 to 1.00] |
|                                           |                                  | Percentage <sup>†</sup>            | -7.3 [-8.7 to -6.0]                           | 0.1 ± 3.8 [-0.7 to 0.9]                       | 7.5 [6.1 to 8.8]                 |                     |
|                                           | Skewness                         | Absolute <sup>†</sup>              | -4.27e-01 [-5.04e-01 to -3.49e-01]            | -7.18e-03 ± 2.14e-01 [-5.20e-02 to 3.76e-02]  | -4.27e-01 [4.12e-01 to 3.35e-01] | 0.98 [0.97 to 0.99] |
|                                           |                                  | Percentage <sup>†</sup>            | -788.8 [-938.2 to -639.4]                     | 18.4 ± 411.8 [-67.8 to 104.7]                 | 825.6 [676.2 to 975.0]           |                     |
|                                           | Kurtosis                         | Absolute <sup>†</sup>              | -2.71e+00 [-3.20e+00 to -2.22e+00]            | -6.63e-02 ± 1.35e+00 [-3.49e-01 to 2.16e-01]  | -2.71e+00 [2.58e+00 to 2.09e+00] | 0.92 [0.87 to 0.95] |
|                                           |                                  | Percentage <sup>†</sup>            | -1378.9 [-1631.3 to -1126.4]                  | -14.9 ± 695.9 [-160.6 to 130.9]               | 1349.1 [1096.7 to 1601.6]        |                     |
|                                           | Root mean squared                | Absolute <sup>†</sup>              | -2.67e+01 [-3.18e+01 to -2.15e+01]            | 1.23e+00 ± 1.42e+01 [-1.75e+00 to 4.21e+00]   | -2.67e+01 [2.91e+01 to 2.40e+01] | 1.00 [1.00 to 1.00] |
|                                           |                                  | Percentage <sup>†</sup>            | -6.8 [-8.1 to -5.5]                           | 0.0 ± 3.5 [-0.7 to 0.8]                       | 6.9 [5.6 to 8.2]                 |                     |
|                                           | Energy                           | Absolute <sup>†</sup>              | -5.66e+09 [-6.75e+09 to -4.56e+09]            | 2.61e+08 ± 3.02e+09 [-3.72e+08 to 8.93e+08]   | -5.66e+09 [6.18e+09 to 5.08e+09] | 1.00 [0.99 to 1.00] |
|                                           |                                  | Percentage <sup>†</sup>            | -27.1 [-32.6 to -21.6]                        | 2.4 ± 15.1 [-0.7 to 5.6]                      | 32.0 [26.5 to 37.4]              |                     |
|                                           | Mean absolute deviation          | Absolute <sup>†</sup>              | -1.37e+01 [-1.60e+01 to -1.14e+01]            | -1.40e+00 ± 6.28e+00 [-2.71e+00 to -8.03e-02] | -1.37e+01 [1.09e+01 to 8.63e+00] | 0.99 [0.99 to 1.00] |
|                                           |                                  | Percentage <sup>†</sup>            | -17.0 [-20.0 to -14.1]                        | -1.1 ± 8.1 [-2.8 to 0.6]                      | 14.7 [11.8 to 17.7]              |                     |
|                                           | Median absolute deviation        | Absolute <sup>†</sup>              | -1.39e+01 [-1.62e+01 to -1.16e+01]            | -1.33e+00 ± 6.40e+00 [-2.67e+00 to 7.55e-03]  | -1.39e+01 [1.12e+01 to 8.89e+00] | 0.99 [0.99 to 0.99] |
|                                           |                                  | Percentage <sup>†</sup>            | -17.0 [-20.0 to -14.1]                        | -1.1 ± 8.1 [-2.8 to 0.6]                      | 14.9 [12.0 to 17.9]              |                     |
|                                           | 10 <sup>th</sup> percentile      | Absolute <sup>†</sup>              | -4.17e+01 [-5.01e+01 to -3.33e+01]            | 3.81e+00 ± 2.32e+01 [-1.05e+00 to 8.68e+00]   | -4.17e+01 [4.93e+01 to 4.09e+01] | 0.99 [0.99 to 1.00] |
|                                           |                                  | Percentage <sup>†</sup>            | -14.5 [-17.3 to -11.7]                        | 0.6 ± 7.7 [-1.0 to 2.2]                       | 15.7 [12.9 to 18.5]              |                     |
|                                           | 90 <sup>th</sup> percentile      | Absolute <sup>†</sup>              | -2.41e+01 [-2.84e+01 to -1.97e+01]            | -7.30e-01 ± 1.19e+01 [-3.22e+00 to 1.76e+00]  | -2.41e+01 [2.26e+01 to 1.83e+01] | 1.00 [1.00 to 1.00] |
|                                           |                                  | Percentage <sup>†</sup>            | -5.9 [-6.9 to -4.8]                           | -0.2 ± 2.9 [-0.8 to 0.4]                      | 5.4 [4.4 to 6.5]                 |                     |
|                                           | Robust mean absolute deviation   | Absolute <sup>†</sup>              | -1.07e+01 [-1.25e+01 to -8.95e+00]            | -1.16e+00 ± 4.88e+00 [-2.19e+00 to -1.43e-01] | -1.07e+01 [8.39e+00 to 6.62e+00] | 0.99 [0.99 to 0.99] |
|                                           |                                  | Percentage <sup>†</sup>            | -18.2 [-21.3 to -15.1]                        | -1.3 ± 8.6 [-3.1 to 0.5]                      | 15.6 [12.5 to 18.7]              |                     |
|                                           | Robust median absolute deviation | Absolute <sup>†</sup>              | -1.10e+01 [-1.28e+01 to -9.18e+00]            | -1.17e+00 ± 5.02e+00 [-2.22e+00 to -1.14e-01] | -1.10e+01 [8.67e+00 to 6.85e+00] | 0.99 [0.99 to 0.99] |
|                                           |                                  | Percentage <sup>†</sup>            | -18.3 [-21.5 to -15.2]                        | -1.3 ± 8.7 [-3.1 to 0.5]                      | 15.7 [12.6 to 18.9]              |                     |
|                                           | Interquartile range              | Absolute <sup>†</sup>              | -2.74e+01 [-3.19e+01 to -2.28e+01]            | -2.95e+00 ± 1.25e+01 [-5.56e+00 to -3.39e-01] | -2.74e+01 [2.15e+01 to 1.70e+01] | 0.99 [0.99 to 0.99] |
|                                           |                                  | Percentage <sup>†</sup>            | -18.8 [-22.0 to -15.6]                        | -1.4 ± 8.9 [-3.3 to 0.4]                      | 15.9 [12.7 to 19.1]              |                     |
|                                           | Coefficient of dispersion        | Absolute <sup>†</sup>              | -3.69e-02 [-4.31e-02 to -3.06e-02]            | -3.28e-03 ± 1.71e-02 [-6.87e-03 to 3.08e-04]  | -3.69e-02 [3.03e-02 to 2.41e-02] | 0.97 [0.95 to 0.98] |
|                                           |                                  | Percentage <sup>†</sup>            | -22.6 [-26.6 to -18.7]                        | -1.5 ± 10.8 [-3.8 to 0.7]                     | 19.6 [15.7 to 23.5]              |                     |
| Coefficient of variation                  | Absolute <sup>†</sup>            | -4.87e-02 [-5.74e-02 to -4.01e-02] | -2.16e-03 ± 2.38e-02 [-7.14e-03 to 2.82e-03]  | -4.87e-02 [4.44e-02 to 3.58e-02]              | 0.97 [0.96 to 0.98]              |                     |
|                                           | Percentage <sup>†</sup>          | -20.8 [-24.4 to -17.1]             | -1.1 ± 10.0 [-3.2 to 1.0]                     | 18.6 [15.0 to 22.2]                           |                                  |                     |
| Energy                                    | Absolute <sup>†</sup>            | -1.72e-04 [-2.03e-04 to -1.40e-04] | 5.75e-07 ± 8.78e-05 [-1.78e-05 to 1.90e-05]   | -1.72e-04 [1.73e-04 to 1.41e-04]              | 0.98 [0.97 to 0.99]              |                     |
|                                           | Percentage <sup>†</sup>          | -21.8 [-25.9 to -17.7]             | 0.3 ± 11.3 [-2.0 to 2.7]                      | 22.4 [18.3 to 26.5]                           |                                  |                     |
| Entropy                                   | Absolute <sup>†</sup>            | -2.65e-01 [-3.14e-01 to -2.16e-01] | -8.19e-04 ± 1.35e-01 [-2.91e-02 to 2.74e-02]  | -2.65e-01 [2.64e-01 to 2.15e-01]              | 0.98 [0.97 to 0.99]              |                     |
|                                           | Percentage <sup>†</sup>          | -2.3 [-2.8 to -1.9]                | -0.0 ± 1.2 [-0.3 to 0.2]                      | 2.3 [1.9 to 2.7]                              |                                  |                     |
| Contrast                                  | Absolute <sup>†</sup>            | -2.96e+01 [-3.52e+01 to -2.39e+01] | 9.33e-01 ± 1.56e+01 [-2.32e+00 to 4.19e+00]   | -2.96e+01 [3.14e+01 to 2.58e+01]              | 0.98 [0.97 to 0.98]              |                     |
|                                           | Percentage <sup>†</sup>          | -21.7 [-25.8 to -17.6]             | 0.6 ± 11.4 [-1.8 to 2.9]                      | 22.8 [18.7 to 27.0]                           |                                  |                     |
| Homogeneity                               | Absolute <sup>†</sup>            | -2.14e-02 [-2.53e-02 to -1.74e-02] | 1.57e-04 ± 1.10e-02 [-2.14e-03 to 2.46e-03]   | -2.14e-02 [2.17e-02 to 1.77e-02]              | 0.97 [0.96 to 0.98]              |                     |
|                                           | Percentage <sup>†</sup>          | -12.8 [-15.2 to -10.4]             | 0.1 ± 6.6 [-1.3 to 1.5]                       | 13.0 [10.6 to 15.4]                           |                                  |                     |
| Correlation                               | Absolute <sup>†</sup>            | -2.78e-02 [-3.28e-02 to -2.28e-02] | -6.03e-04 ± 1.39e-02 [-3.51e-03 to 2.30e-03]  | -2.78e-02 [2.66e-02 to 2.16e-02]              | 0.97 [0.96 to 0.98]              |                     |
|                                           | Percentage <sup>†</sup>          | -3.2 [-3.8 to -2.6]                | -0.1 ± 1.6 [-0.4 to 0.3]                      | 3.1 [2.5 to 3.7]                              |                                  |                     |
| Dissimilarity                             | Absolute <sup>†</sup>            | -9.76e-01 [-1.16e+00 to -7.93e-01] | 1.54e-02 ± 5.06e-01 [-9.05e-02 to 1.21e-01]   | -9.76e-01 [1.01e+00 to 8.23e-01]              | 0.98 [0.96 to 0.98]              |                     |
|                                           | Percentage <sup>†</sup>          | -12.8 [-15.2 to -10.4]             | 0.1 ± 6.6 [-1.2 to 1.5]                       | 13.1 [10.7 to 15.5]                           |                                  |                     |
| Sum average                               | Absolute <sup>†</sup>            | -1.31e+01 [-1.55e+01 to -1.06e+01] | 3.32e-02 ± 6.69e+00 [-1.37e+00 to 1.43e+00]   | -1.31e+01 [1.31e+01 to 1.07e+01]              | 0.98 [0.97 to 0.99]              |                     |
|                                           | Percentage <sup>†</sup>          | -10.7 [-12.7 to -8.7]              | 0.1 ± 5.5 [-1.1 to 1.3]                       | 10.9 [8.9 to 12.9]                            |                                  |                     |
| Sum variance                              | Absolute <sup>†</sup>            | -5.01e+02 [-5.86e+02 to -4.15e+02] | -4.04e+01 ± 2.35e+02 [-8.96e+01 to 8.77e+00]  | -5.01e+02 [4.20e+02 to 3.35e+02]              | 0.98 [0.96 to 0.98]              |                     |
|                                           | Percentage <sup>†</sup>          | -18.5 [-21.7 to -15.2]             | -1.0 ± 8.9 [-2.9 to 0.9]                      | 16.5 [13.2 to 19.7]                           |                                  |                     |
| Sum entropy                               | Absolute <sup>†</sup>            | -1.23e-01 [-1.45e-01 to -1.01e-01] | -3.31e-03 ± 6.12e-02 [-1.61e-02 to 9.50e-03]  | -1.23e-01 [1.17e-01 to 9.44e-02]              | 0.98 [0.97 to 0.99]              |                     |
|                                           | Percentage <sup>†</sup>          | -1.7 [-2.0 to -1.4]                | -0.0 ± 0.8 [-0.2 to 0.1]                      | 1.6 [1.3 to 1.9]                              |                                  |                     |
| Cluster shade                             | Absolute <sup>†</sup>            | -4.98e+04 [-5.93e+04 to -4.04e+04] | 1.11e+03 ± 2.60e+04 [-4.34e+03 to 6.55e+03]   | -4.98e+04 [5.21e+04 to 4.26e+04]              | 0.97 [0.96 to 0.98]              |                     |
|                                           | Percentage <sup>†</sup>          | -2741.4 [-3225.4 to -2257.5]       | -126.8 ± 1334.0 [-406.2 to 152.6]             | 2487.8 [2003.8 to 2971.7]                     |                                  |                     |
| Cluster prominence                        | Absolute <sup>†</sup>            | -6.99e+06 [-8.18e+06 to -5.80e+06] | -5.72e+05 ± 3.28e+06 [-1.26e+06 to 1.14e+05]  | -6.99e+06 [5.85e+06 to 4.66e+06]              | 0.96 [0.95 to 0.98]              |                     |
|                                           | Percentage <sup>†</sup>          | -29.5 [-34.6 to -24.3]             | -1.8 ± 14.1 [-4.7 to 1.2]                     | 26.0 [20.8 to 31.1]                           |                                  |                     |
| Harlick's correlation                     | Absolute <sup>†</sup>            | -1.13e+08 [-1.31e+08 to -9.37e+07] | -1.09e+07 ± 5.19e+07 [-2.17e+07 to -2.01e+04] | -1.13e+08 [9.08e+07 to 7.20e+07]              | 0.98 [0.96 to 0.98]              |                     |
|                                           | Percentage <sup>†</sup>          | -30.6 [-35.9 to -25.3]             | -2.1 ± 14.5 [-5.2 to 0.9]                     | 26.3 [21.1 to 31.6]                           |                                  |                     |
| Joint maximum                             | Absolute <sup>†</sup>            | -5.76e-04 [-6.85e-04 to -4.67e-04] | 1.15e-05 ± 3.00e-04 [-5.13e-05 to 7.43e-05]   | -5.76e-04 [5.99e-04 to 4.90e-04]              | 0.99 [0.98 to 0.99]              |                     |
|                                           | Percentage <sup>†</sup>          | -12.3 [-14.6 to -9.9]              | 0.3 ± 6.4 [-1.0 to 1.7]                       | 12.9 [10.6 to 15.3]                           |                                  |                     |
| Joint average                             | Absolute <sup>†</sup>            | -6.54e+00 [-7.75e+00 to -5.32e+00] | 1.66e-02 ± 3.34e+00 [-6.84e-01 to 7.17e-01]   | -6.54e+00 [6.57e+00 to 5.36e+00]              | 0.98 [0.97 to 0.99]              |                     |
|                                           | Percentage <sup>†</sup>          | -10.7 [-12.7 to -8.7]              | 0.1 ± 5.5 [-1.1 to 1.3]                       | 10.9 [8.9 to 12.9]                            |                                  |                     |
| Joint variance                            | Absolute <sup>†</sup>            | -1.25e+02 [-1.46e+02 to -1.04e+02] | -9.87e+00 ± 5.88e+01 [-2.22e+01 to 2.44e+00]  | -1.25e+02 [1.05e+02 to 8.40e+01]              | 0.98 [0.97 to 0.99]              |                     |
|                                           | Percentage <sup>†</sup>          | -17.7 [-20.8 to -14.6]             | -1.0 ± 8.5 [-2.8 to 0.8]                      | 15.8 [12.7 to 18.9]                           |                                  |                     |
| Inverse difference                        | Absolute <sup>†</sup>            | -2.23e-02 [-2.64e-02 to -1.82e-02] | 1.11e-04 ± 1.14e-02 [-2.28e-03 to 2.51e-03]   | -2.23e-02 [2.25e-02 to 1.84e-02]              | 0.97 [0.96 to 0.98]              |                     |
|                                           | Percentage <sup>†</sup>          | -8.9 [-10.6 to -7.2]               | 0.0 ± 4.6 [-0.9 to 1.0]                       | 9.0 [7.3 to 10.6]                             |                                  |                     |
| Normalized Inverse difference             | Absolute <sup>†</sup>            | -6.43e-03 [-7.60e-03 to -5.25e-03] | -7.89e-05 ± 3.24e-03 [-7.57e-04 to 6.00e-04]  | -6.43e-03 [6.27e-03 to 5.10e-03]              | 0.98 [0.96 to 0.98]              |                     |
|                                           | Percentage <sup>†</sup>          | -0.7 [-0.8 to -0.6]                | -0.0 ± 0.3 [-0.1 to 0.1]                      | 0.7 [0.5 to 0.8]                              |                                  |                     |
| Normalized inverse difference moment      | Absolute <sup>†</sup>            | -1.74e-03 [-2.05e-03 to -1.43e-03] | -4.99e-05 ± 8.62e-04 [-2.30e-04 to 1.31e-04]  | -1.74e-03 [1.64e-03 to 1.33e-03]              | 0.98 [0.97 to 0.98]              |                     |
|                                           | Percentage <sup>†</sup>          | -0.2 [-0.2 to -0.1]                | -0.0 ± 0.1 [-0.0 to 0.0]                      | 0.2 [0.1 to 0.2]                              |                                  |                     |
| Inverse variance                          | Absolute <sup>†</sup>            | -2.08e-02 [-2.47e-02 to -1.69e-02] | 1.84e-04 ± 1.07e-02 [-2.06e-03 to 2.43e-03]   | -2.08e-02 [2.12e-02 to 1.73e-02]              | 0.97 [0.96 to 0.98]              |                     |
|                                           | Percentage <sup>†</sup>          | -12.8 [-15.2 to -10.4]             | 0.1 ± 6.6 [-1.3 to 1.5]                       | 13.0 [10.6 to 15.4]                           |                                  |                     |
| Difference entropy                        | Absolute <sup>†</sup>            | -1.77e-01 [-2.10e-01 to -1.44e-01] | 2.28e-03 ± 9.13e-02 [-1.68e-02 to 2.14e-02]   | -1.77e-01 [1.81e-01 to 1.48e-01]              | 0.97 [0.96 to 0.98]              |                     |
|                                           | Percentage <sup>†</sup>          | -4.1 [-4.8 to -3.3]                | 0.0 ± 2.1 [-0.4 to 0.5]                       | 4.2 [3.4 to 4.9]                              |                                  |                     |
| Difference variance                       | Absolute <sup>†</sup>            | -1.46e+01 [-1.74e+01 to -1.17e+01] | 6.11e-01 ± 7.74e+00 [-1.01e+00 to 2.23e+00]   | -1.46e+01 [1.58e+01 to 1.30e+01]              | 0.98 [0.97 to 0.99]              |                     |
|                                           | Percentage <sup>†</sup>          | -19.0 [-22.7 to -15.4]             | 0.9 ± 10.2 [-1.2 to 3.0]                      | 20.8 [17.2 to 24.5]                           |                                  |                     |
| Difference average                        | Absolute <sup>†</sup>            | -9.76e-01 [-1.16e+00 to -7.93e-01] | 1.54e-02 ± 5.06e-01 [-9.05e-02 to 1.21e-01]   | -9.76e-01 [1.01e+00 to 8.23e-01]              | 0.98 [0.96 to 0.98]              |                     |
|                                           | Percentage <sup>†</sup>          | -12.8 [-15.2 to -10.4]             | 0.1 ± 6.6 [-1.2 to 1.5]                       | 13.1 [10.7 to 15.5]                           |                                  |                     |
| Cluster tendency                          | Absolute <sup>†</sup>            | -5.01e+02 [-5.86e+02 to -4.15e+02] | -4.04e+01 ± 2.35e+02 [-8.96e+01 to 8.77e+00]  | -5.01e+02 [4.20e+02 to 3.35e+02]              | 0.98 [0.96 to 0.98]              |                     |
|                                           | Percentage <sup>†</sup>          | -18.5 [-21.7 to -15.2]             | -1.0 ± 8.9 [-2.9 to 0.9]                      | 16.5 [13.2 to 19.7]                           |                                  |                     |
| Autocorrelation                           | Absolute <sup>†</sup>            | -8.16e+02 [-9.64e+02 to -6.67e+02] | -1.35e+01 ± 4.09e+02 [-9.93e+01 to 7.22e+01]  | -8.16e+02 [7.89e+02 to 6.40e+02]              | 0.98 [0.98 to 0.99]              |                     |
|                                           | Percentage <sup>†</sup>          | -17.3 [-20.5 to -14.1]             | -0.0 ± 8.8 [-1.9 to 1.8]                      | 17.3 [14.1 to 20.4]                           |                                  |                     |
| First measure of information correlation  | Absolute <sup>†</sup>            | -2.39e-02 [-2.85e-02 to -1.94e-02] | 6.36e-04 ± 1.25e-02 [-1.99e-03 to 3.26e-03]   | -2.39e-02 [2.52e-02 to 2.07e-02]              | 0.97 [0.95 to 0.98]              |                     |
|                                           | Percentage <sup>†</sup>          | -12.8 [-15.1 to -10.4]             | -0.2 ± 6.4 [-1.6 to 1.1]                      | 12.3 [10.0 to 14.7]                           |                                  |                     |
| Second measure of information correlation | Absolute <sup>†</sup>            | -1.42e-02 [-1.69e-02 to -1.16e-02] | 7.04e-05 ± 7.29e-03 [-1.46e-03 to 1.60e-03]   | -1.42e-02 [1.44e-02 to 1.17e-02]              | 0.97 [0.95 to 0.98]              |                     |
|                                           | Percentage <sup>†</sup>          | -1.5 [-1.8 to -1.2]                | 0.0 ± 0.8 [-0.2 to 0.2]                       | 1.5 [1.2 to 1.8]                              |                                  |                     |
| SAE                                       | Absolute <sup>†</sup>            | -2.12e-02 [-2.55e-02 to -1.70e-02] | 1.71e-03 ± 1.17e-02 [-7.43e-04 to 4.16e-03]   | -2.12e-02 [2.46e-02 to 2.04e-02]              | 0.97 [0.96 to 0.98]              |                     |
|                                           | Percentage <sup>†</sup>          | -3.0 [-3.6 to -2.4]                | 0.2 ± 1.6 [-0.1 to 0.6]                       | 3.5 [2.9 to 4.1]                              |                                  |                     |
| LAE                                       | Absolute <sup>†</sup>            | -7.58e+01 [-8.90e+01 to -6.26e+01] | -4.29e+00 ± 3.65e+01 [-1.19e+01 to 3.35e+00]  | -7.58e+01 [6.72e+01 to 5.40e+01]              | 1.00 [0.99 to 1.00]              |                     |
|                                           | Percentage <sup>†</sup>          | -64.8 [-76.5 to -53.1]             | -1.7 ± 32.2 [-8.4 to 5.1]                     | 61.4 [49.7 to 73.1]                           |                                  |                     |
| GLN                                       | Absolute <sup>†</sup>            | -1.54e+02 [-1.85e+02 to -1.24e+02] | 1.10e+01 ± 8.44e+01 [-6.67e+00 to 2.87e+01]   | -1.54e+02 [1.76e+02 to 1.46e+02]              | 0.99 [0.98 to 0.99]              |                     |
|                                           | Percentage <sup>†</sup>          | -32.0 [-38.4 to -25.6]             | 2.5 ± 17.6 [-1.2 to 6.1]                      | 37.0                                          |                                  |                     |

|                              |                         |                                    |                                              |                                               |                                  |                     |
|------------------------------|-------------------------|------------------------------------|----------------------------------------------|-----------------------------------------------|----------------------------------|---------------------|
| GLSZM                        | ZP                      | Absolute <sup>†</sup>              | -5.36e-02 [-6.37e-02 to -4.36e-02]           | 7.29e-04 ± 2.77e-02 [-5.08e-03 to 6.54e-03]   | -5.36e-02 [5.51e-02 to 4.50e-02] | 0.97 [0.96 to 0.98] |
|                              |                         | Percentage <sup>†</sup>            | -11.7 [-13.9 to -9.5]                        | 0.2 ± 6.1 [-1.1 to 1.4]                       | 12.0 [9.8 to 14.2]               |                     |
|                              | LGLZE                   | Absolute <sup>†</sup>              | -1.11e-03 [-1.32e-03 to -8.98e-04]           | 3.57e-05 ± 5.85e-04 [-8.67e-05 to 1.58e-04]   | -1.11e-03 [1.18e-03 to 9.70e-04] | 0.95 [0.93 to 0.97] |
|                              |                         | Percentage <sup>†</sup>            | -38.4 [-45.8 to -31.0]                       | 1.4 ± 20.3 [-2.8 to 5.7]                      | 41.2 [33.8 to 48.6]              |                     |
|                              | HGLZE                   | Absolute <sup>†</sup>              | -7.49e+02 [-8.84e+02 to -6.13e+02]           | -1.79e+01 ± 3.73e+02 [-9.60e+01 to 6.02e+01]  | -7.49e+02 [7.13e+02 to 5.78e+02] | 0.98 [0.97 to 0.99] |
|                              |                         | Percentage <sup>†</sup>            | -16.7 [-19.7 to -13.6]                       | -0.1 ± 8.4 [-1.9 to 1.6]                      | 16.4 [13.4 to 19.5]              |                     |
|                              | SALGLE                  | Absolute <sup>†</sup>              | -6.82e-04 [-8.09e-04 to -5.54e-04]           | 7.89e-06 ± 3.52e-04 [-6.58e-05 to 8.16e-05]   | -6.82e-04 [6.97e-04 to 5.70e-04] | 0.95 [0.93 to 0.97] |
|                              |                         | Percentage <sup>†</sup>            | -40.6 [-48.3 to -32.9]                       | 1.0 ± 21.2 [-3.4 to 5.5]                      | 42.7 [35.0 to 50.4]              |                     |
|                              | SAHGLE                  | Absolute <sup>†</sup>              | -4.61e+02 [-5.44e+02 to -3.78e+02]           | -1.12e+01 ± 2.29e+02 [-5.93e+01 to 3.68e+01]  | -4.61e+02 [4.38e+02 to 3.55e+02] | 0.98 [0.98 to 0.99] |
|                              |                         | Percentage <sup>†</sup>            | -14.5 [-17.2 to -11.8]                       | -0.1 ± 7.4 [-1.6 to 1.5]                      | 14.4 [11.7 to 17.1]              |                     |
|                              | LALGLE                  | Absolute <sup>†</sup>              | -8.79e+00 [-1.03e+01 to -7.25e+00]           | -4.50e-01 ± 4.26e+00 [-1.34e+00 to 4.42e-01]  | -8.79e+00 [7.89e+00 to 6.35e+00] | 0.82 [0.73 to 0.88] |
|                              |                         | Percentage <sup>†</sup>            | -118.9 [-139.5 to -98.4]                     | -7.7 ± 56.8 [-19.5 to 4.2]                    | 103.6 [83.0 to 124.2]            |                     |
|                              | LAHGLE                  | Absolute <sup>†</sup>              | -6.32e+05 [-7.45e+05 to -5.20e+05]           | -2.59e+04 ± 3.09e+05 [-9.07e+04 to 3.90e+04]  | -6.32e+05 [5.81e+05 to 4.68e+05] | 1.00 [1.00 to 1.00] |
|                              |                         | Percentage <sup>†</sup>            | -57.5 [-68.0 to -47.1]                       | -1.0 ± 28.8 [-7.1 to 5.0]                     | 55.5 [45.0 to 65.9]              |                     |
|                              | GLV                     | Absolute <sup>†</sup>              | -8.75e+01 [-1.03e+02 to -7.18e+01]           | -2.62e+00 ± 4.33e+01 [-1.17e+01 to 6.45e+00]  | -8.75e+01 [8.22e+01 to 6.65e+01] | 0.98 [0.97 to 0.99] |
|                              |                         | Percentage <sup>†</sup>            | -13.4 [-15.8 to -10.9]                       | -0.1 ± 6.8 [-1.6 to 1.3]                      | 13.1 [10.6 to 15.5]              |                     |
| SZV                          | Absolute <sup>†</sup>   | -7.48e+01 [-8.78e+01 to -6.17e+01] | -4.27e+00 ± 3.60e+01 [-1.18e+01 to 3.27e+00] | -7.48e+01 [6.62e+01 to 5.32e+01]              | 1.00 [0.99 to 1.00]              |                     |
|                              | Percentage <sup>†</sup> | -70.8 [-83.6 to -58.0]             | -1.5 ± 35.3 [-8.9 to 5.9]                    | 67.8 [55.0 to 80.6]                           |                                  |                     |
| Sobel                        | Mean                    | Absolute <sup>†</sup>              | -2.88e+01 [-3.40e+01 to -2.36e+01]           | -6.64e-01 ± 1.44e+01 [-3.67e+00 to 2.34e+00]  | -2.88e+01 [2.75e+01 to 2.23e+01] | 0.99 [0.99 to 1.00] |
|                              |                         | Percentage <sup>†</sup>            | -12.8 [-15.2 to -10.5]                       | -0.2 ± 6.5 [-1.5 to 1.2]                      | 12.5 [10.2 to 14.9]              |                     |
|                              | SD                      | Absolute <sup>†</sup>              | -2.79e+01 [-3.31e+01 to -2.27e+01]           | -2.70e-02 ± 1.42e+01 [-3.01e+00 to 2.95e+00]  | -2.79e+01 [2.78e+01 to 2.27e+01] | 0.99 [0.99 to 1.00] |
|                              |                         | Percentage <sup>†</sup>            | -12.8 [-15.2 to -10.3]                       | 0.5 ± 6.8 [-0.9 to 1.9]                       | 13.8 [11.3 to 16.2]              |                     |
|                              | Skewness                | Absolute <sup>†</sup>              | -3.81e-01 [-4.54e-01 to -3.08e-01]           | 1.37e-02 ± 2.01e-01 [-2.84e-02 to 5.59e-02]   | -3.81e-01 [4.08e-01 to 3.35e-01] | 0.98 [0.97 to 0.99] |
| Percentage <sup>†</sup>      |                         | -13.9 [-16.6 to -11.2]             | 0.5 ± 7.4 [-1.0 to 2.1]                      | 15.0 [12.3 to 17.6]                           |                                  |                     |
| Kurtosis                     | Absolute <sup>†</sup>   | -4.34e+00 [-5.15e+00 to -3.53e+00] | 3.16e-02 ± 2.23e+00 [-4.36e-01 to 4.99e-01]  | -4.34e+00 [4.40e+00 to 3.59e+00]              | 0.96 [0.94 to 0.97]              |                     |
|                              | Percentage <sup>†</sup> | -24.2 [-28.8 to -19.7]             | 0.3 ± 12.5 [-2.4 to 2.9]                     | 24.8 [20.2 to 29.3]                           |                                  |                     |
| LoG                          | Mean                    | Absolute <sup>†</sup>              | -1.29e-02 [-1.55e-02 to -1.03e-02]           | 1.02e-03 ± 7.09e-03 [-4.65e-04 to 2.51e-03]   | -1.29e-02 [1.49e-02 to 1.24e-02] | 0.99 [0.99 to 1.00] |
|                              |                         | Percentage <sup>†</sup>            | -6.0 [-7.2 to -4.9]                          | 0.3 ± 3.2 [-0.4 to 1.0]                       | 6.7 [5.5 to 7.9]                 |                     |
|                              | SD                      | Absolute <sup>†</sup>              | -8.72e-03 [-1.04e-02 to -7.02e-03]           | 4.59e-04 ± 4.68e-03 [-5.22e-04 to 1.44e-03]   | -8.72e-03 [9.64e-03 to 7.94e-03] | 1.00 [0.99 to 1.00] |
|                              |                         | Percentage <sup>†</sup>            | -2.2 [-2.7 to -1.8]                          | 0.1 ± 1.2 [-0.2 to 0.3]                       | 2.4 [2.0 to 2.8]                 |                     |
|                              | Skewness                | Absolute <sup>†</sup>              | -1.06e-01 [-1.25e-01 to -8.73e-02]           | -4.70e-03 ± 5.17e-02 [-1.55e-02 to 6.12e-03]  | -1.06e-01 [9.66e-02 to 7.79e-02] | 0.99 [0.99 to 1.00] |
| Percentage <sup>†</sup>      |                         | -8.3 [-9.7 to -6.8]                | -0.6 ± 3.9 [-1.4 to 0.3]                     | 7.1 [5.7 to 8.6]                              |                                  |                     |
| Kurtosis                     | Absolute <sup>†</sup>   | -3.24e-01 [-3.83e-01 to -2.65e-01] | -4.45e-03 ± 1.63e-01 [-3.86e-02 to 2.97e-02] | -3.24e-01 [3.15e-01 to 2.56e-01]              | 0.99 [0.99 to 1.00]              |                     |
|                              | Percentage <sup>†</sup> | -9.7 [-11.4 to -8.0]               | -0.5 ± 4.7 [-1.5 to 0.5]                     | 8.7 [7.0 to 10.4]                             |                                  |                     |
| Gabor <sub>θ=0°,f=2</sub>    | Mean                    | Absolute <sup>†</sup>              | -1.52e+00 [-1.76e+00 to -1.29e+00]           | -2.49e-01 ± 6.50e-01 [-3.85e-01 to -1.12e-01] | -1.52e+00 [1.03e+00 to 7.90e-01] | 1.00 [1.00 to 1.00] |
|                              |                         | Percentage <sup>†</sup>            | -1.0 [-1.2 to -0.9]                          | -0.2 ± 0.4 [-0.3 to -0.1]                     | 0.7 [0.5 to 0.9]                 |                     |
|                              | SD                      | Absolute <sup>†</sup>              | -1.61e+00 [-1.91e+00 to -1.31e+00]           | 7.48e-03 ± 8.28e-01 [-1.66e-01 to 1.81e-01]   | -1.61e+00 [1.63e+00 to 1.33e+00] | 0.99 [0.99 to 0.99] |
|                              |                         | Percentage <sup>†</sup>            | -10.6 [-12.6 to -8.6]                        | 0.2 ± 5.5 [-0.9 to 1.4]                       | 11.0 [9.0 to 13.0]               |                     |
|                              | Skewness                | Absolute <sup>†</sup>              | -3.51e-01 [-4.18e-01 to -2.84e-01]           | 1.03e-02 ± 1.84e-01 [-2.83e-02 to 4.89e-02]   | -3.51e-01 [3.71e-01 to 3.05e-01] | 0.97 [0.95 to 0.98] |
| Percentage <sup>†</sup>      |                         | -652.5 [-778.3 to -526.7]          | 27.2 ± 346.8 [-45.4 to 99.9]                 | 707.0 [581.1 to 832.8]                        |                                  |                     |
| Kurtosis                     | Absolute <sup>†</sup>   | -1.34e+00 [-1.61e+00 to -1.08e+00] | 7.87e-02 ± 7.26e-01 [-7.33e-02 to 2.31e-01]  | -1.34e+00 [1.50e+00 to 1.24e+00]              | 0.96 [0.94 to 0.98]              |                     |
|                              | Percentage <sup>†</sup> | -20.1 [-24.1 to -16.1]             | 1.5 ± 11.0 [-0.8 to 3.8]                     | 23.2 [19.2 to 27.2]                           |                                  |                     |
| Gabor <sub>θ=30°,f=2</sub>   | Mean                    | Absolute <sup>†</sup>              | -1.66e+00 [-1.91e+00 to -1.41e+00]           | -2.99e-01 ± 6.96e-01 [-4.44e-01 to -1.53e-01] | -1.66e+00 [1.06e+00 to 8.12e-01] | 1.00 [1.00 to 1.00] |
|                              |                         | Percentage <sup>†</sup>            | -1.1 [-1.3 to -1.0]                          | -0.2 ± 0.5 [-0.3 to -0.1]                     | 0.7 [0.6 to 0.9]                 |                     |
|                              | SD                      | Absolute <sup>†</sup>              | -1.69e+00 [-2.00e+00 to -1.38e+00]           | -1.16e-02 ± 8.54e-01 [-1.91e-01 to 1.67e-01]  | -1.69e+00 [1.66e+00 to 1.35e+00] | 0.99 [0.99 to 0.99] |
|                              |                         | Percentage <sup>†</sup>            | -12.2 [-14.5 to -10.0]                       | -0.0 ± 6.2 [-1.3 to 1.3]                      | 12.2 [9.9 to 14.5]               |                     |
|                              | Skewness                | Absolute <sup>†</sup>              | -3.11e-01 [-3.69e-01 to -2.52e-01]           | 4.58e-03 ± 1.61e-01 [-2.91e-02 to 3.83e-02]   | -3.11e-01 [3.20e-01 to 2.61e-01] | 0.97 [0.96 to 0.98] |
| Percentage <sup>†</sup>      |                         | -1143.3 [-1359.7 to -926.8]        | 26.1 ± 596.6 [-98.9 to 151.0]                | 1195.5 [979.0 to 1411.9]                      |                                  |                     |
| Kurtosis                     | Absolute <sup>†</sup>   | -1.33e+00 [-1.60e+00 to -1.06e+00] | 1.26e-01 ± 7.42e-01 [-2.92e-02 to 2.81e-01]  | -1.33e+00 [1.58e+00 to 1.31e+00]              | 0.94 [0.92 to 0.96]              |                     |
|                              | Percentage <sup>†</sup> | -21.5 [-25.8 to -17.1]             | 2.1 ± 12.0 [-0.4 to 4.6]                     | 25.6 [21.3 to 30.0]                           |                                  |                     |
| Gabor <sub>θ=45°,f=2</sub>   | Mean                    | Absolute <sup>†</sup>              | -1.68e+00 [-1.94e+00 to -1.42e+00]           | -2.71e-01 ± 7.18e-01 [-4.21e-01 to -1.21e-01] | -1.68e+00 [1.14e+00 to 8.75e-01] | 1.00 [1.00 to 1.00] |
|                              |                         | Percentage <sup>†</sup>            | -1.1 [-1.3 to -1.0]                          | -0.2 ± 0.5 [-0.3 to -0.1]                     | 0.8 [0.6 to 0.9]                 |                     |
|                              | SD                      | Absolute <sup>†</sup>              | -1.62e+00 [-1.92e+00 to -1.32e+00]           | 3.54e-03 ± 8.26e-01 [-1.70e-01 to 1.77e-01]   | -1.62e+00 [1.62e+00 to 1.32e+00] | 0.99 [0.99 to 0.99] |
|                              |                         | Percentage <sup>†</sup>            | -12.0 [-14.3 to -9.8]                        | 0.2 ± 6.2 [-1.1 to 1.5]                       | 12.5 [10.2 to 14.7]              |                     |
|                              | Skewness                | Absolute <sup>†</sup>              | -3.24e-01 [-3.80e-01 to -2.68e-01]           | -2.00e-02 ± 1.55e-01 [-5.25e-02 to 1.25e-02]  | -3.24e-01 [2.84e-01 to 2.28e-01] | 0.98 [0.97 to 0.99] |
| Percentage <sup>†</sup>      |                         | -690.6 [-826.0 to -555.3]          | 40.6 ± 373.1 [-37.5 to 118.8]                | 771.9 [636.6 to 907.3]                        |                                  |                     |
| Kurtosis                     | Absolute <sup>†</sup>   | -1.08e+00 [-1.29e+00 to -8.63e-01] | 8.75e-02 ± 5.95e-01 [-3.71e-02 to 2.12e-01]  | -1.08e+00 [1.25e+00 to 1.04e+00]              | 0.96 [0.95 to 0.98]              |                     |
|                              | Percentage <sup>†</sup> | -19.0 [-22.8 to -15.2]             | 1.3 ± 10.4 [-0.8 to 3.5]                     | 21.7 [17.9 to 25.5]                           |                                  |                     |
| Gabor <sub>θ=90°,f=2</sub>   | Mean                    | Absolute <sup>†</sup>              | -2.06e+00 [-2.41e+00 to -1.71e+00]           | -1.93e-01 ± 9.53e-01 [-3.93e-01 to 6.20e-03]  | -2.06e+00 [1.67e+00 to 1.33e+00] | 1.00 [1.00 to 1.00] |
|                              |                         | Percentage <sup>†</sup>            | -1.3 [-1.6 to -1.1]                          | -0.1 ± 0.6 [-0.3 to 0.0]                      | 1.1 [0.9 to 1.3]                 |                     |
|                              | SD                      | Absolute <sup>†</sup>              | -1.54e+00 [-1.81e+00 to -1.26e+00]           | -4.83e-02 ± 7.60e-01 [-2.07e-01 to 1.11e-01]  | -1.54e+00 [1.44e+00 to 1.17e+00] | 0.99 [0.99 to 1.00] |
|                              |                         | Percentage <sup>†</sup>            | -10.7 [-12.6 to -8.7]                        | -0.2 ± 5.3 [-1.3 to 0.9]                      | 10.2 [8.3 to 12.2]               |                     |
|                              | Skewness                | Absolute <sup>†</sup>              | -3.75e-01 [-4.39e-01 to -3.12e-01]           | -3.33e-02 ± 1.75e-01 [-6.99e-02 to 3.25e-03]  | -3.75e-01 [3.09e-01 to 2.45e-01] | 0.98 [0.96 to 0.98] |
| Percentage <sup>†</sup>      |                         | -217.1 [-259.7 to -174.6]          | 12.6 ± 117.2 [-12.0 to 37.1]                 | 242.3 [199.8 to 284.8]                        |                                  |                     |
| Kurtosis                     | Absolute <sup>†</sup>   | -8.50e-01 [-1.01e+00 to -6.86e-01] | 3.70e-02 ± 4.53e-01 [-5.78e-02 to 1.32e-01]  | -8.50e-01 [9.24e-01 to 7.60e-01]              | 0.98 [0.97 to 0.99]              |                     |
|                              | Percentage <sup>†</sup> | -15.1 [-17.9 to -12.2]             | 0.5 ± 7.9 [-1.2 to 2.1]                      | 16.0 [13.1 to 18.9]                           |                                  |                     |
| Gabor <sub>θ=0°,f=2v2</sub>  | Mean                    | Absolute <sup>†</sup>              | -1.22e+00 [-1.42e+00 to -1.03e+00]           | -1.76e-01 ± 5.34e-01 [-2.88e-01 to -6.41e-02] | -1.22e+00 [8.71e-01 to 6.77e-01] | 1.00 [1.00 to 1.00] |
|                              |                         | Percentage <sup>†</sup>            | -0.9 [-1.0 to -0.7]                          | -0.1 ± 0.4 [-0.2 to -0.0]                     | 0.6 [0.5 to 0.8]                 |                     |
|                              | SD                      | Absolute <sup>†</sup>              | -1.28e+00 [-1.53e+00 to -1.04e+00]           | 5.68e-02 ± 6.84e-01 [-8.65e-02 to 2.00e-01]   | -1.28e+00 [1.40e+00 to 1.15e+00] | 0.99 [0.99 to 0.99] |
|                              |                         | Percentage <sup>†</sup>            | -10.1 [-12.1 to -8.1]                        | 0.7 ± 5.5 [-0.5 to 1.8]                       | 11.5 [9.5 to 13.5]               |                     |
|                              | Skewness                | Absolute <sup>†</sup>              | -3.16e-01 [-3.73e-01 to -2.58e-01]           | -6.43e-03 ± 1.58e-01 [-3.95e-02 to 2.66e-02]  | -3.16e-01 [3.03e-01 to 2.46e-01] | 0.98 [0.97 to 0.99] |
| Percentage <sup>†</sup>      |                         | -371.3 [-433.7 to -308.9]          | -34.1 ± 172.0 [-70.2 to 1.9]                 | 303.1 [240.6 to 365.5]                        |                                  |                     |
| Kurtosis                     | Absolute <sup>†</sup>   | -1.33e+00 [-1.57e+00 to -1.09e+00] | -2.52e-02 ± 6.65e-01 [-1.65e-01 to 1.14e-01] | -1.33e+00 [1.28e+00 to 1.04e+00]              | 0.98 [0.97 to 0.99]              |                     |
|                              | Percentage <sup>†</sup> | -19.9 [-23.6 to -16.2]             | -0.0 ± 10.1 [-2.2 to 2.1]                    | 19.8 [16.1 to 23.5]                           |                                  |                     |
| Gabor <sub>θ=30°,f=2v2</sub> | Mean                    | Absolute <sup>†</sup>              | -1.44e+00 [-1.68e+00 to -1.20e+00]           | -1.53e-01 ± 6.57e-01 [-2.91e-01 to -1.54e-02] | -1.44e+00 [1.13e+00 to 8.96e-01] | 1.00 [1.00 to 1.00] |
|                              |                         | Percentage <sup>†</sup>            | -1.0 [-1.2 to -0.9]                          | -0.1 ± 0.5 [-0.2 to -0.0]                     | 0.8 [0.6 to 1.0]                 |                     |
|                              | SD                      | Absolute <sup>†</sup>              | -1.49e+00 [-1.77e+00 to -1.21e+00]           | 2.10e-02 ± 7.71e-01 [-1.41e-01 to 1.83e-01]   | -1.49e+00 [1.53e+00 to 1.25e+00] | 0.99 [0.98 to 0.99] |
|                              |                         | Percentage <sup>†</sup>            | -13.5 [-16.1 to -11.0]                       | 0.3 ± 7.1 [-1.2 to 1.8]                       | 14.2 [11.6 to 16.7]              |                     |
|                              | Skewness                | Absolute <sup>†</sup>              | -3.25e-01 [-3.87e-01 to -2.64e-01]           | 7.80e-03 ± 1.70e-01 [-2.78e-02 to 4.34e-02]   | -3.25e-01 [3.41e-01 to 2.79e-01] | 0.97 [0.96 to 0.98] |
| Percentage <sup>†</sup>      |                         | -2784.0 [-3273.9 to -2294.0]       | -136.8 ± 1350.6 [-419.7 to 146.0]            | 2510.3 [2020.4 to 3000.3]                     |                                  |                     |
| Kurtosis                     | Absolute <sup>†</sup>   | -2.58e+00 [-3.06e+00 to -2.10e+00] | 1.70e-02 ± 1.33e+00 [-2.61e-01 to 2.95e-01]  | -2.58e+00 [2.62e+00 to 2.13e+00]              | 0.95 [0.93 to 0.97]              |                     |
|                              | Percentage <sup>†</sup> | -25.4 [-30.2 to -20.6]             | 0.6 ± 13.2 [-2.2 to 3.4]                     | 26.6 [21.8 to 31.4]                           |                                  |                     |
| Gabor <sub>θ=45°,f=2v2</sub> | Mean                    | Absolute <sup>†</sup>              | -1.18e+00 [-1.37e+00 to -9.92e-01]           | -1.65e-01 ± 5.18e-01 [-2.74e-01 to -5.70e-02] | -1.18e+00 [8.49e-01 to 6.61e-01] | 1.00 [1.00 to 1.00] |
|                              |                         | Percentage <sup>†</sup>            | -0.8 [-1.0 to -0.7]                          | -0.1 ± 0.4 [-0.2 to -0.0]                     | 0.6 [0.5 to 0.7]                 |                     |
|                              | SD                      | Absolute <sup>†</sup>              | -1.41e+00 [-1.67e+00 to -1.15e+00]           | -9.56e-04 ± 7.21e-01 [-1.52e-01 to 1.50e-01]  | -1.41e+00 [1.41e+00 to 1.15e+00] | 0.99 [0.99 to 0.99] |
|                              |                         | Percentage <sup>†</sup>            | -12.2 [-14.5 to -9.9]                        | 0.2 ± 6.3 [-1.2 to 1.5]                       | 12.5 [10.3 to 14.8]              |                     |
|                              | Skewness                | Absolute <sup>†</sup>              | -2.93e-01 [-3.45e-01 to -2.41e-01]           | -1.15e-02 ± 1.44e-01 [-4.16e-02 to 1.86e-02]  | -2.93e-01 [2.70e-01 to 2.18e-01] | 0.98 [0.98 to 0.99] |
| Percentage <sup>†</sup>      |                         | -72672.0 [-85427.5 to -59916.6]    | -3756.1 ± 35161.2 [-11120.5 to 3608.3]       | 65159.8 [52404.4 to 77915.3]                  |                                  |                     |
| Kurtosis                     | Absolute <sup>†</sup>   | -2.20e+00 [-2.61e+00 to -1.79e+00] | 1.77e-02 ± 1.13e+00 [-2.19e-01 to 2.54e-01]  | -2.20e+00 [2.23e+00 to 1.82e+00]              | 0.94 [0.91 to 0.96]              |                     |
|                              | Percentage <sup>†</sup> | -25.7 [-30.5 to -20.8]             | 0.7 ± 13.5 [-2.1 to 3.5]                     | 27.1 [22.2 to 32.0]                           |                                  |                     |
| Gabor <sub>θ=90°,f=2v2</sub> | Mean                    | Absolute <sup>†</sup>              | -1.51e+00 [-1.77e+00 to -1.24e+00]           | -6.00e-02 ± 7.38e-01 [-2.15e-01 to 9.45e-02]  | -1.51e+00 [1.39e+00 to 1.12e+00] | 1.00 [1.00 to 1.00] |
|                              |                         | Percentage <sup>†</sup>            | -1.1 [-1.3 to -0.9]                          | -0.0 ± 0.5 [-0.2 to 0.1]                      | 1.0 [0.8 to 1.2]                 |                     |
|                              | SD                      | Absolute <sup>†</sup>              | -1.30e+00 [-1.54e+00 to -1.07e+00]           | -5.20e-02 ± 6.39e-01 [-1.86e-01 to 8.18e-02]  | -1.30e+00 [1.20e+00 to 9.69e-01] | 0.99 [0.99 to 1.00] |
|                              |                         | Percentage <sup>†</sup>            | -10.8 [-12.8 to -8.8]                        | -0.2 ± 5.4 [-1.3 to 0.9]                      | 10.4 [8.4 to 12.4]               |                     |
|                              | Skewness                | Absolute <sup>†</sup>              | -3.63e-01 [-4.26e-01 to -3.00e-01]           | -2.17e-02 ± 1.74e-01 [-5.82e-02 to 1.48e-02]  | -3.63e-01 [3.20e-01 to 2.56e-01] | 0.97 [0.95 to 0.98] |
| Percentage <sup>†</sup>      |                         | -378.1 [-445.1 to -311.2]          | -16.3 ± 184.6 [-55.0 to 22.3]                | 345.5 [278.5 to 412.4]                        |                                  |                     |
|                              |                         |                                    |                                              |                                               |                                  |                     |

| Feature category                          | Feature Name                     | Differences                        | LR [95% CI]                                   | Mean ± SD [95%]                              | URL [95%]                       | ICC [95% CI]        |
|-------------------------------------------|----------------------------------|------------------------------------|-----------------------------------------------|----------------------------------------------|---------------------------------|---------------------|
| Histogram                                 | Minimum                          | Absolute <sup>†</sup>              | -9.32e+00 [-1.10e+01 to -7.65e+00]            | -3.11e-01 ± 4.60e+00 [-1.27e+00 to 6.52e-01] | 8.70e+00 [7.03e+00 to 1.04e+01] | 0.98 [0.97 to 0.99] |
|                                           |                                  | Percentage <sup>†</sup>            | -91.6 [-107.5 to -75.8]                       | -6.0 ± 43.7 [-15.2 to 3.1]                   | 79.6 [63.7 to 95.4]             |                     |
|                                           | Maximum                          | Absolute <sup>†</sup>              | -3.49e+01 [-4.15e+01 to -2.84e+01]            | 3.99e-01 ± 1.80e+01 [-3.38e+00 to 4.17e+00]  | 3.57e+01 [2.92e+01 to 4.23e+01] | 1.00 [1.00 to 1.00] |
|                                           |                                  | Percentage <sup>†</sup>            | -25.0 [-29.7 to -20.3]                        | 0.4 ± 12.9 [-2.3 to 3.1]                     | 25.7 [21.0 to 30.4]             |                     |
|                                           | Mean                             | Absolute <sup>†</sup>              | -6.39e+00 [-7.52e+00 to -5.26e+00]            | -2.89e-01 ± 3.11e+00 [-9.41e-01 to 3.63e-01] | 5.81e+00 [4.68e+00 to 6.94e+00] | 1.00 [1.00 to 1.00] |
|                                           |                                  | Percentage <sup>†</sup>            | -7.3 [-8.6 to -6.0]                           | -0.4 ± 3.5 [-1.1 to 0.4]                     | 6.6 [5.3 to 7.9]                |                     |
|                                           | Range                            | Absolute <sup>†</sup>              | -3.71e+01 [-4.41e+01 to -3.01e+01]            | 7.09e-01 ± 1.93e+01 [-3.33e+00 to 4.75e+00]  | 3.85e+01 [3.15e+01 to 4.55e+01] | 1.00 [1.00 to 1.00] |
|                                           |                                  | Percentage <sup>†</sup>            | -28.0 [-33.4 to -22.7]                        | 0.9 ± 14.8 [-2.2 to 4.0]                     | 29.8 [24.4 to 35.2]             |                     |
|                                           | Standard deviation               | Absolute <sup>†</sup>              | -9.44e+00 [-1.11e+01 to -7.78e+00]            | -4.60e-01 ± 4.58e+00 [-1.42e+00 to 5.00e-01] | 8.52e+00 [6.86e+00 to 1.02e+01] | 0.99 [0.99 to 0.99] |
|                                           |                                  | Percentage <sup>†</sup>            | -30.7 [-36.0 to -25.5]                        | -2.5 ± 14.4 [-5.5 to 0.5]                    | 25.7 [20.5 to 31.0]             |                     |
|                                           | Variance                         | Absolute <sup>†</sup>              | -2.53e+03 [-2.97e+03 to -2.08e+03]            | -1.17e+02 ± 1.23e+03 [-3.74e+02 to 1.41e+02] | 2.29e+03 [1.85e+03 to 2.74e+03] | 0.98 [0.97 to 0.99] |
|                                           |                                  | Percentage <sup>†</sup>            | -58.6 [-68.6 to -48.6]                        | -4.8 ± 27.5 [-10.5 to 1.0]                   | 49.1 [39.1 to 59.0]             |                     |
|                                           | Median                           | Absolute <sup>†</sup>              | -4.02e+00 [-4.76e+00 to -3.27e+00]            | 2.61e-02 ± 2.06e+00 [-4.06e-01 to 4.58e-01]  | 4.07e+00 [3.32e+00 to 4.82e+00] | 1.00 [1.00 to 1.00] |
|                                           |                                  | Percentage <sup>†</sup>            | -5.7 [-6.7 to -4.7]                           | -0.2 ± 2.8 [-0.8 to 0.4]                     | 5.3 [4.3 to 6.4]                |                     |
|                                           | Skewness                         | Absolute <sup>†</sup>              | -8.96e-01 [-1.05e+00 to -7.39e-01]            | -4.85e-02 ± 4.32e-01 [-1.39e-01 to 4.20e-02] | 7.99e-01 [6.42e-01 to 9.56e-01] | 0.92 [0.88 to 0.95] |
|                                           |                                  | Percentage <sup>†</sup>            | -205.9 [-244.5 to -167.4]                     | 2.5 ± 106.3 [-19.8 to 24.8]                  | 210.9 [172.3 to 249.5]          |                     |
|                                           | Kurtosis                         | Absolute <sup>†</sup>              | -3.90e+00 [-4.59e+00 to -3.20e+00]            | -1.36e-01 ± 1.92e+00 [-5.38e-01 to 2.66e-01] | 3.63e+00 [2.93e+00 to 4.32e+00] | 0.89 [0.84 to 0.93] |
|                                           |                                  | Percentage <sup>†</sup>            | -194.5 [-232.8 to -156.2]                     | 12.6 ± 105.6 [-9.6 to 34.7]                  | 219.6 [181.3 to 258.0]          |                     |
|                                           | Root mean squared                | Absolute <sup>†</sup>              | -8.58e+00 [-1.01e+01 to -7.07e+00]            | -4.35e-01 ± 4.16e+00 [-1.31e+00 to 4.36e-01] | 7.71e+00 [6.20e+00 to 9.22e+00] | 1.00 [1.00 to 1.00] |
|                                           |                                  | Percentage <sup>†</sup>            | -8.5 [-9.9 to -7.0]                           | -0.5 ± 4.1 [-1.4 to 0.3]                     | 7.4 [6.0 to 8.9]                |                     |
|                                           | Energy                           | Absolute <sup>†</sup>              | -4.76e+09 [-5.66e+09 to -3.86e+09]            | 9.96e+07 ± 2.48e+09 [-4.20e+08 to 6.19e+08]  | 4.96e+09 [4.06e+09 to 5.86e+09] | 0.98 [0.97 to 0.99] |
|                                           |                                  | Percentage <sup>†</sup>            | -50.4 [-61.0 to -39.9]                        | 6.7 ± 29.2 [0.6 to 12.8]                     | 63.9 [53.3 to 74.4]             |                     |
|                                           | Mean absolute deviation          | Absolute <sup>†</sup>              | -7.87e+00 [-9.25e+00 to -6.50e+00]            | -4.35e-01 ± 3.79e+00 [-1.23e+00 to 3.60e-01] | 7.00e+00 [5.63e+00 to 8.38e+00] | 0.99 [0.98 to 0.99] |
|                                           |                                  | Percentage <sup>†</sup>            | -32.5 [-38.1 to -26.9]                        | -2.2 ± 15.4 [-5.5 to 1.0]                    | 28.0 [22.4 to 33.6]             |                     |
|                                           | Median absolute deviation        | Absolute <sup>†</sup>              | -6.88e+00 [-8.09e+00 to -5.67e+00]            | -3.47e-01 ± 3.34e+00 [-1.05e+00 to 3.52e-01] | 6.19e+00 [4.98e+00 to 7.40e+00] | 0.99 [0.99 to 0.99] |
|                                           |                                  | Percentage <sup>†</sup>            | -30.6 [-35.9 to -25.3]                        | -2.0 ± 14.6 [-5.0 to 1.1]                    | 26.7 [21.4 to 32.0]             |                     |
|                                           | 10 <sup>th</sup> percentile      | Absolute <sup>†</sup>              | -5.53e+00 [-6.56e+00 to -4.50e+00]            | 3.49e-02 ± 2.84e+00 [-5.60e-01 to 6.29e-01]  | 5.60e+00 [4.57e+00 to 6.63e+00] | 1.00 [1.00 to 1.00] |
|                                           |                                  | Percentage <sup>†</sup>            | -8.3 [-9.8 to -6.7]                           | 0.1 ± 4.3 [-0.8 to 1.0]                      | 8.4 [6.9 to 10.0]               |                     |
|                                           | 90 <sup>th</sup> percentile      | Absolute <sup>†</sup>              | -1.62e+01 [-1.90e+01 to -1.34e+01]            | -9.60e-01 ± 7.77e+00 [-2.59e+00 to 6.68e-01] | 1.43e+01 [1.15e+01 to 1.71e+01] | 1.00 [1.00 to 1.00] |
|                                           |                                  | Percentage <sup>†</sup>            | -14.7 [-17.3 to -12.1]                        | -0.7 ± 7.1 [-2.2 to 0.8]                     | 13.2 [10.7 to 15.8]             |                     |
|                                           | Robust mean absolute deviation   | Absolute <sup>†</sup>              | -6.39e+00 [-7.51e+00 to -5.27e+00]            | -3.42e-01 ± 3.09e+00 [-9.88e-01 to 3.04e-01] | 5.71e+00 [4.59e+00 to 6.82e+00] | 0.98 [0.97 to 0.99] |
|                                           |                                  | Percentage <sup>†</sup>            | -37.3 [-44.0 to -30.6]                        | -1.2 ± 18.4 [-5.1 to 2.6]                    | 34.9 [28.2 to 41.6]             |                     |
|                                           | Robust median absolute deviation | Absolute <sup>†</sup>              | -5.55e+00 [-6.52e+00 to -4.58e+00]            | -3.03e-01 ± 2.68e+00 [-8.64e-01 to 2.58e-01] | 4.95e+00 [3.98e+00 to 5.92e+00] | 0.98 [0.97 to 0.99] |
|                                           |                                  | Percentage <sup>†</sup>            | -35.4 [-41.8 to -29.1]                        | -1.3 ± 17.4 [-4.9 to 2.4]                    | 32.9 [26.6 to 39.2]             |                     |
|                                           | Interquartile range              | Absolute <sup>†</sup>              | -1.86e+01 [-2.19e+01 to -1.54e+01]            | -9.99e-01 ± 9.00e+00 [-2.88e+00 to 8.86e-01] | 1.66e+01 [1.34e+01 to 1.99e+01] | 0.96 [0.94 to 0.97] |
|                                           |                                  | Percentage <sup>†</sup>            | -41.2 [-48.6 to -33.8]                        | -1.1 ± 20.5 [-5.4 to 3.2]                    | 39.0 [31.6 to 46.4]             |                     |
| Coefficient of dispersion                 | Absolute <sup>†</sup>            | -4.80e-02 [-5.67e-02 to -3.94e-02] | -1.40e-03 ± 2.38e-02 [-6.38e-03 to 3.59e-03]  | 4.53e-02 [3.66e-02 to 5.39e-02]              | 0.94 [0.91 to 0.96]             |                     |
|                                           | Percentage <sup>†</sup>          | -35.4 [-41.8 to -29.0]             | -0.9 ± 17.6 [-4.6 to 2.7]                     | 33.5 [27.2 to 39.9]                          |                                 |                     |
| Coefficient of variation                  | Absolute <sup>†</sup>            | -7.03e-02 [-8.22e-02 to -5.83e-02] | -5.79e-03 ± 3.29e-02 [-1.27e-02 to 1.09e-03]  | 5.87e-02 [4.67e-02 to 7.06e-02]              | 0.95 [0.92 to 0.97]             |                     |
|                                           | Percentage <sup>†</sup>          | -27.3 [-32.0 to -22.7]             | -2.1 ± 12.8 [-4.8 to 0.5]                     | 23.0 [18.4 to 27.7]                          |                                 |                     |
| Energy                                    | Absolute <sup>†</sup>            | -9.71e-04 [-1.14e-03 to -7.98e-04] | -3.62e-05 ± 4.77e-04 [-1.36e-04 to 6.38e-05]  | 8.99e-04 [7.26e-04 to 1.07e-03]              | 0.84 [0.75 to 0.89]             |                     |
|                                           | Percentage <sup>†</sup>          | -51.6 [-61.4 to -41.9]             | 1.2 ± 26.9 [-4.5 to 6.8]                      | 54.0 [44.2 to 63.8]                          |                                 |                     |
| Entropy                                   | Absolute <sup>†</sup>            | -6.46e-01 [-7.65e-01 to -5.28e-01] | -5.08e-03 ± 3.27e-01 [-7.36e-02 to 6.35e-02]  | 6.36e-01 [5.18e-01 to 7.55e-01]              | 0.92 [0.88 to 0.95]             |                     |
|                                           | Percentage <sup>†</sup>          | -6.1 [-7.2 to -4.9]                | -0.0 ± 3.1 [-0.7 to 0.6]                      | 6.0 [4.9 to 7.2]                             |                                 |                     |
| Contrast                                  | Absolute <sup>†</sup>            | -3.84e+01 [-4.51e+01 to -3.17e+01] | -2.12e+00 ± 1.85e+01 [-6.00e+00 to 1.76e+00]  | 3.42e+01 [2.74e+01 to 4.09e+01]              | 0.97 [0.96 to 0.98]             |                     |
|                                           | Percentage <sup>†</sup>          | -34.2 [-40.4 to -28.0]             | -0.6 ± 17.2 [-4.2 to 3.0]                     | 33.1 [26.8 to 39.3]                          |                                 |                     |
| Homogeneity                               | Absolute <sup>†</sup>            | -5.01e-02 [-5.95e-02 to -4.07e-02] | 8.07e-04 ± 2.60e-02 [-4.63e-03 to 6.25e-03]   | 5.17e-02 [4.23e-02 to 6.11e-02]              | 0.92 [0.88 to 0.95]             |                     |
|                                           | Percentage <sup>†</sup>          | -21.4 [-25.5 to -17.3]             | 0.9 ± 11.4 [-1.5 to 3.3]                      | 23.3 [19.1 to 27.4]                          |                                 |                     |
| Correlation                               | Absolute <sup>†</sup>            | -2.96e-02 [-3.48e-02 to -2.44e-02] | -1.40e-03 ± 1.44e-02 [-4.41e-03 to 1.62e-03]  | 2.68e-02 [2.16e-02 to 3.20e-02]              | 0.97 [0.96 to 0.98]             |                     |
|                                           | Percentage <sup>†</sup>          | -3.5 [-4.1 to -2.9]                | -0.2 ± 1.7 [-0.5 to 0.2]                      | 3.2 [2.5 to 3.8]                             |                                 |                     |
| Dissimilarity                             | Absolute <sup>†</sup>            | -1.46e+00 [-1.72e+00 to -1.20e+00] | -6.65e-02 ± 7.11e-01 [-2.15e-01 to 8.25e-02]  | 1.33e+00 [1.07e+00 to 1.59e+00]              | 0.95 [0.93 to 0.97]             |                     |
|                                           | Percentage <sup>†</sup>          | -22.5 [-26.5 to -18.4]             | -0.5 ± 11.2 [-2.8 to 1.9]                     | 21.5 [17.5 to 25.6]                          |                                 |                     |
| Sum average                               | Absolute <sup>†</sup>            | -2.33e+01 [-2.78e+01 to -1.88e+01] | 9.82e-01 ± 1.24e+01 [-1.61e+00 to 3.58e+00]   | 2.53e+01 [2.08e+01 to 2.98e+01]              | 0.92 [0.89 to 0.95]             |                     |
|                                           | Percentage <sup>†</sup>          | -20.1 [-24.1 to -16.1]             | 1.4 ± 11.0 [-0.9 to 3.7]                      | 22.9 [19.0 to 26.9]                          |                                 |                     |
| Sum variance                              | Absolute <sup>†</sup>            | -6.85e+02 [-8.05e+02 to -5.66e+02] | -3.82e+01 ± 3.30e+02 [-1.07e+02 to 3.09e+01]  | 6.09e+02 [4.89e+02 to 7.29e+02]              | 0.94 [0.91 to 0.96]             |                     |
|                                           | Percentage <sup>†</sup>          | -31.6 [-37.1 to -26.2]             | -2.3 ± 15.0 [-5.4 to 0.9]                     | 27.1 [21.6 to 32.5]                          |                                 |                     |
| Sum entropy                               | Absolute <sup>†</sup>            | -2.99e-01 [-3.54e-01 to -2.43e-01] | 3.59e-04 ± 1.52e-01 [-3.16e-02 to 3.23e-02]   | 2.99e-01 [2.44e-01 to 3.55e-01]              | 0.92 [0.88 to 0.95]             |                     |
|                                           | Percentage <sup>†</sup>          | -4.3 [-5.1 to -3.5]                | 0.0 ± 2.2 [-0.4 to 0.5]                       | 4.4 [3.6 to 5.2]                             |                                 |                     |
| Cluster shade                             | Absolute <sup>†</sup>            | -7.49e+04 [-8.80e+04 to -6.17e+04] | -3.62e+03 ± 3.63e+04 [-1.12e+04 to 4.00e+03]  | 6.76e+04 [5.44e+04 to 8.08e+04]              | 0.95 [0.92 to 0.97]             |                     |
|                                           | Percentage <sup>†</sup>          | -298.3 [-348.1 to -248.5]          | -29.2 ± 137.3 [-58.0 to -0.5]                 | 239.8 [190.0 to 289.6]                       |                                 |                     |
| Cluster prominence                        | Absolute <sup>†</sup>            | -9.33e+06 [-1.09e+07 to -7.78e+06] | -9.58e+05 ± 4.27e+06 [-1.85e+06 to -6.34e+04] | 7.41e+06 [5.86e+06 to 8.96e+06]              | 0.95 [0.92 to 0.97]             |                     |
|                                           | Percentage <sup>†</sup>          | -45.7 [-53.1 to -38.3]             | -5.7 ± 20.4 [-9.9 to -1.4]                    | 34.3 [26.9 to 41.7]                          |                                 |                     |
| Harlick's correlation                     | Absolute <sup>†</sup>            | -8.93e+07 [-1.05e+08 to -7.36e+07] | -4.62e+06 ± 4.32e+07 [-1.37e+07 to 4.43e+06]  | 8.01e+07 [6.44e+07 to 9.57e+07]              | 0.89 [0.83 to 0.93]             |                     |
|                                           | Percentage <sup>†</sup>          | -71.6 [-85.0 to -58.3]             | 0.4 ± 36.8 [-7.3 to 8.1]                      | 72.5 [59.2 to 85.8]                          |                                 |                     |
| Joint maximum                             | Absolute <sup>†</sup>            | -2.50e-03 [-2.95e-03 to -2.06e-03] | -8.11e-05 ± 1.24e-03 [-3.40e-04 to 1.78e-04]  | 2.34e-03 [1.89e-03 to 2.79e-03]              | 0.86 [0.79 to 0.91]             |                     |
|                                           | Percentage <sup>†</sup>          | -31.7 [-37.6 to -25.9]             | -0.1 ± 16.1 [-3.5 to 3.3]                     | 31.5 [25.7 to 37.4]                          |                                 |                     |
| Joint average                             | Absolute <sup>†</sup>            | -1.17e+01 [-1.39e+01 to -9.41e+00] | 4.91e-01 ± 6.20e+00 [-8.07e-01 to 1.79e+00]   | 1.26e+01 [1.04e+01 to 1.49e+01]              | 0.92 [0.89 to 0.95]             |                     |
|                                           | Percentage <sup>†</sup>          | -20.1 [-24.1 to -16.1]             | 1.4 ± 11.0 [-0.9 to 3.7]                      | 22.9 [19.0 to 26.9]                          |                                 |                     |
| Joint variance                            | Absolute <sup>†</sup>            | -1.79e+02 [-2.10e+02 to -1.47e+02] | -1.01e+01 ± 8.59e+01 [-2.81e+01 to 7.91e+00]  | 1.58e+02 [1.27e+02 to 1.90e+02]              | 0.94 [0.91 to 0.96]             |                     |
|                                           | Percentage <sup>†</sup>          | -31.3 [-36.7 to -25.9]             | -2.2 ± 14.9 [-5.3 to 0.9]                     | 26.9 [21.5 to 32.3]                          |                                 |                     |
| Inverse difference                        | Absolute <sup>†</sup>            | -4.70e-02 [-5.59e-02 to -3.81e-02] | 9.85e-04 ± 2.45e-02 [-4.14e-03 to 6.11e-03]   | 4.90e-02 [4.01e-02 to 5.78e-02]              | 0.93 [0.89 to 0.95]             |                     |
|                                           | Percentage <sup>†</sup>          | -15.0 [-17.9 to -12.1]             | 0.6 ± 8.0 [-1.1 to 2.3]                       | 16.2 [13.3 to 19.1]                          |                                 |                     |
| Normalized Inverse difference             | Absolute <sup>†</sup>            | -8.78e-03 [-1.05e-02 to -7.08e-03] | 4.19e-04 ± 4.69e-03 [-5.64e-04 to 1.40e-03]   | 9.61e-03 [7.91e-03 to 1.13e-02]              | 0.95 [0.92 to 0.97]             |                     |
|                                           | Percentage <sup>†</sup>          | -0.9 [-1.1 to -0.7]                | 0.0 ± 0.5 [-0.1 to 0.1]                       | 1.0 [0.8 to 1.2]                             |                                 |                     |
| Normalized inverse difference moment      | Absolute <sup>†</sup>            | -1.89e-03 [-2.26e-03 to -1.52e-03] | 1.20e-04 ± 1.02e-03 [-9.48e-05 to 3.35e-04]   | 2.13e-03 [1.76e-03 to 2.50e-03]              | 0.97 [0.96 to 0.98]             |                     |
|                                           | Percentage <sup>†</sup>          | -0.2 [-0.2 to -0.2]                | 0.0 ± 0.1 [-0.0 to 0.0]                       | 0.2 [0.2 to 0.3]                             |                                 |                     |
| Inverse variance                          | Absolute <sup>†</sup>            | -4.47e-02 [-5.32e-02 to -3.62e-02] | 1.26e-03 ± 2.35e-02 [-3.66e-03 to 6.17e-03]   | 4.72e-02 [3.87e-02 to 5.58e-02]              | 0.92 [0.89 to 0.95]             |                     |
|                                           | Percentage <sup>†</sup>          | -20.3 [-24.3 to -16.4]             | 1.0 ± 10.9 [-1.2 to 3.3]                      | 22.4 [18.4 to 26.4]                          |                                 |                     |
| Difference entropy                        | Absolute <sup>†</sup>            | -3.29e-01 [-3.89e-01 to -2.69e-01] | -6.72e-03 ± 1.64e-01 [-4.12e-02 to 2.77e-02]  | 3.15e-01 [2.56e-01 to 3.75e-01]              | 0.94 [0.91 to 0.96]             |                     |
|                                           | Percentage <sup>†</sup>          | -8.0 [-9.5 to -6.6]                | -0.1 ± 4.1 [-0.9 to 0.8]                      | 7.9 [6.4 to 9.3]                             |                                 |                     |
| Difference variance                       | Absolute <sup>†</sup>            | -1.91e+01 [-2.26e+01 to -1.57e+01] | -6.84e-01 ± 9.42e+00 [-2.66e+00 to 1.29e+00]  | 1.78e+01 [1.44e+01 to 2.12e+01]              | 0.98 [0.97 to 0.99]             |                     |
|                                           | Percentage <sup>†</sup>          | -29.4 [-34.9 to -24.0]             | -0.1 ± 15.0 [-3.2 to 3.0]                     | 29.2 [23.8 to 34.6]                          |                                 |                     |
| Difference average                        | Absolute <sup>†</sup>            | -1.46e+00 [-1.72e+00 to -1.20e+00] | -6.65e-02 ± 7.11e-01 [-2.15e-01 to 8.25e-02]  | 1.33e+00 [1.07e+00 to 1.59e+00]              | 0.95 [0.93 to 0.97]             |                     |
|                                           | Percentage <sup>†</sup>          | -22.5 [-26.5 to -18.4]             | -0.5 ± 11.2 [-2.8 to 1.9]                     | 21.5 [17.5 to 25.6]                          |                                 |                     |
| Cluster tendency                          | Absolute <sup>†</sup>            | -6.85e+02 [-8.05e+02 to -5.66e+02] | -3.82e+01 ± 3.30e+02 [-1.07e+02 to 3.09e+01]  | 6.09e+02 [4.89e+02 to 7.29e+02]              | 0.94 [0.91 to 0.96]             |                     |
|                                           | Percentage <sup>†</sup>          | -31.6 [-37.1 to -26.2]             | -2.3 ± 15.0 [-5.4 to 0.9]                     | 27.1 [21.6 to 32.5]                          |                                 |                     |
| Autocorrelation                           | Absolute <sup>†</sup>            | -1.48e+03 [-1.76e+03 to -1.20e+03] | 1.37e+01 ± 7.63e+02 [-1.46e+02 to 1.74e+02]   | 1.51e+03 [1.23e+03 to 1.79e+03]              | 0.89 [0.84 to 0.93]             |                     |
|                                           | Percentage <sup>†</sup>          | -35.0 [-41.9 to -28.2]             | 1.9 ± 18.9 [-2.0 to 5.9]                      | 38.9 [32.1 to 45.8]                          |                                 |                     |
| First measure of information correlation  | Absolute <sup>†</sup>            | -2.66e-02 [-3.15e-02 to -2.18e-02] | -5.17e-04 ± 1.33e-02 [-3.31e-03 to 2.28e-03]  | 2.56e-02 [2.08e-02 to 3.05e-02]              | 0.97 [0.96 to 0.98]             |                     |
|                                           | Percentage <sup>†</sup>          | -12.1 [-14.4 to -9.8]              | 0.3 ± 6.3 [-1.0 to 1.6]                       | 12.7 [10.4 to 14.9]                          |                                 |                     |
| Second measure of information correlation | Absolute <sup>†</sup>            | -1.08e-02 [-1.28e-02 to -8.78e-03] | 1.59e-04 ± 5.60e-03 [-1.01e-03 to 1.33e-03]   | 1.11e-02 [9.10e-03 to 1.32e-02]              | 0.98 [0.97 to 0.99]             |                     |
|                                           | Percentage <sup>†</sup>          | -1.2 [-1.4 to -0.9]                | 0.0 ± 0.6 [-0.1 to 0.1]                       | 1.2 [1.0 to 1.4]                             |                                 |                     |
| SAE                                       | Absolute <sup>†</sup>            | -2.10e-02 [-2.49e-02 to -1.71e-02] | -8.19e-05 ± 1.07e-02 [-2.32e-03 to 2.16e-03]  | 2.09e-02 [1.70e-02 to 2.47e-02]              | 0.97 [0.96 to 0.98]             |                     |
|                                           | Percentage <sup>†</sup>          | -2.9 [-3.5 to -2.4]                | 0.0 ± 1.5 [-0.3 to 0.3]                       | 2.9 [2.4 to 3.5]                             |                                 |                     |
| LAE                                       | Absolute <sup>†</sup>            | -2.63e+03 [-3.07e+03 to -2.18e+03] | -2.14e+02 ± 1.23e+03 [-4.72e+02 to 4.41e+01]  | 2.20e+03 [1.75e+03 to 2.65e+03]              | 0.87 [0.80 to 0.91]             |                     |
|                                           | Percentage <sup>†</sup>          | -112.6 [-135.2 to -90.1]           | 9.3 ± 62.2 [-3.8 to 22.3]                     | 131.2 [108.6 to 153.7]                       |                                 |                     |
| GLN                                       | Absolute <sup>†</sup>            | -3.05e+02 [-3.69e+02 to -2.41e+02] | 4.13e+01 ± 1.77e+02 [4.35e+00 to 7.83e+01]    | 3.88e+                                       |                                 |                     |

|          |                         |                                    |                                               |                                 |                     |
|----------|-------------------------|------------------------------------|-----------------------------------------------|---------------------------------|---------------------|
| ZP       | Absolute <sup>†</sup>   | -9.51e-02 [-1.12e-01 to -7.82e-02] | -4.18e-03 ± 4.64e-02 [-1.39e-02 to 5.53e-03]  | 8.67e-02 [6.99e-02 to 1.04e-01] | 0.93 [0.89 to 0.95] |
|          | Percentage <sup>†</sup> | -25.9 [-30.6 to -21.2]             | -0.6 ± 12.9 [-3.3 to 2.1]                     | 24.7 [20.0 to 29.4]             |                     |
| LGLZE    | Absolute <sup>†</sup>   | -1.29e-03 [-1.51e-03 to -1.07e-03] | -1.06e-04 ± 6.03e-04 [-2.32e-04 to 2.07e-05]  | 1.08e-03 [8.58e-04 to 1.30e-03] | 0.94 [0.91 to 0.96] |
|          | Percentage <sup>†</sup> | -47.1 [-55.4 to -38.8]             | -2.2 ± 22.9 [-7.0 to 2.6]                     | 42.6 [34.3 to 50.9]             |                     |
| HGLZE    | Absolute <sup>†</sup>   | -1.35e+03 [-1.60e+03 to -1.10e+03] | 1.42e+01 ± 6.97e+02 [-1.32e+02 to 1.60e+02]   | 1.38e+03 [1.13e+03 to 1.63e+03] | 0.84 [0.76 to 0.90] |
|          | Percentage <sup>†</sup> | -29.0 [-34.5 to -23.4]             | 1.0 ± 15.3 [-2.2 to 4.2]                      | 30.9 [25.3 to 36.4]             |                     |
| SALGLE   | Absolute <sup>†</sup>   | -6.88e-04 [-8.08e-04 to -5.69e-04] | -4.13e-05 ± 3.30e-04 [-1.10e-04 to 2.79e-05]  | 6.06e-04 [4.86e-04 to 7.26e-04] | 0.94 [0.91 to 0.96] |
|          | Percentage <sup>†</sup> | -42.9 [-50.6 to -35.2]             | -1.2 ± 21.3 [-5.6 to 3.3]                     | 40.5 [32.8 to 48.2]             |                     |
| SAHGLE   | Absolute <sup>†</sup>   | -8.52e+02 [-1.01e+03 to -6.93e+02] | 1.06e+01 ± 4.40e+02 [-8.16e+01 to 1.03e+02]   | 8.74e+02 [7.14e+02 to 1.03e+03] | 0.85 [0.77 to 0.90] |
|          | Percentage <sup>†</sup> | -27.0 [-32.1 to -21.9]             | 0.7 ± 14.1 [-2.2 to 3.7]                      | 28.5 [23.3 to 33.6]             |                     |
| LALGLE   | Absolute <sup>†</sup>   | -1.91e+01 [-2.26e+01 to -1.55e+01] | -5.57e-04 ± 9.73e+00 [-2.04e+00 to 2.04e+00]  | 1.91e+01 [1.55e+01 to 2.26e+01] | 0.93 [0.89 to 0.95] |
|          | Percentage <sup>†</sup> | -97.1 [-115.3 to -78.8]            | 1.6 ± 50.3 [-9.0 to 12.1]                     | 100.2 [82.0 to 118.5]           |                     |
| LAHGLE   | Absolute <sup>†</sup>   | -4.87e+06 [-5.72e+06 to -4.01e+06] | -2.68e+05 ± 2.35e+06 [-7.59e+05 to 2.24e+05]  | 4.33e+06 [3.48e+06 to 5.18e+06] | 0.80 [0.70 to 0.87] |
|          | Percentage <sup>†</sup> | -114.5 [-137.5 to -91.6]           | 9.6 ± 63.3 [-3.7 to 22.8]                     | 133.7 [110.7 to 156.7]          |                     |
| GLV      | Absolute <sup>†</sup>   | -1.65e+02 [-1.94e+02 to -1.37e+02] | -1.06e+01 ± 7.90e+01 [-2.71e+01 to 5.99e+00]  | 1.44e+02 [1.16e+02 to 1.73e+02] | 0.93 [0.90 to 0.96] |
|          | Percentage <sup>†</sup> | -24.2 [-28.3 to -20.1]             | -1.9 ± 11.4 [-4.3 to 0.5]                     | 20.4 [16.2 to 24.5]             |                     |
| SZV      | Absolute <sup>†</sup>   | -2.62e+03 [-3.07e+03 to -2.18e+03] | -2.14e+02 ± 1.23e+03 [-4.71e+02 to 4.39e+01]  | 2.20e+03 [1.75e+03 to 2.64e+03] | 0.87 [0.80 to 0.91] |
|          | Percentage <sup>†</sup> | -114.5 [-137.6 to -91.5]           | 9.9 ± 63.5 [-3.4 to 23.2]                     | 134.3 [111.3 to 157.4]          |                     |
| Mean     | Absolute <sup>†</sup>   | -1.58e+01 [-1.86e+01 to -1.30e+01] | -7.60e-01 ± 7.67e+00 [-2.37e+00 to 8.47e-01]  | 1.43e+01 [1.15e+01 to 1.71e+01] | 0.99 [0.99 to 1.00] |
|          | Percentage <sup>†</sup> | -26.5 [-31.0 to -21.9]             | -1.9 ± 12.5 [-4.6 to 0.7]                     | 22.6 [18.1 to 27.2]             |                     |
| SD       | Absolute <sup>†</sup>   | -1.14e+01 [-1.34e+01 to -9.39e+00] | -5.17e-01 ± 5.56e+00 [-1.68e+00 to 6.47e-01]  | 1.04e+01 [8.36e+00 to 1.24e+01] | 1.00 [1.00 to 1.00] |
|          | Percentage <sup>†</sup> | -25.3 [-29.7 to -20.8]             | -1.3 ± 12.2 [-3.9 to 1.2]                     | 22.6 [18.2 to 27.1]             |                     |
| Skewness | Absolute <sup>†</sup>   | -6.83e-01 [-8.08e-01 to -5.57e-01] | -5.00e-03 ± 3.46e-01 [-7.74e-02 to 6.74e-02]  | 6.73e-01 [5.47e-01 to 7.98e-01] | 0.94 [0.91 to 0.96] |
|          | Percentage <sup>†</sup> | -20.4 [-24.3 to -16.5]             | 0.6 ± 10.7 [-1.7 to 2.8]                      | 21.5 [17.7 to 25.4]             |                     |
| Kurtosis | Absolute <sup>†</sup>   | -7.56e+00 [-8.91e+00 to -6.22e+00] | -2.83e-01 ± 3.72e+00 [-1.06e+00 to 4.96e-01]  | 7.00e+00 [5.65e+00 to 8.35e+00] | 0.91 [0.87 to 0.94] |
|          | Percentage <sup>†</sup> | -35.8 [-42.5 to -29.1]             | 0.4 ± 18.5 [-3.5 to 4.3]                      | 36.6 [29.9 to 43.3]             |                     |
| Mean     | Absolute <sup>†</sup>   | -3.85e-02 [-4.52e-02 to -3.19e-02] | -2.83e-03 ± 1.82e-02 [-6.65e-03 to 9.86e-04]  | 3.29e-02 [2.63e-02 to 3.95e-02] | 0.97 [0.95 to 0.98] |
|          | Percentage <sup>†</sup> | -22.5 [-26.5 to -18.5]             | -1.0 ± 11.0 [-3.3 to 1.3]                     | 20.5 [16.5 to 24.4]             |                     |
| SD       | Absolute <sup>†</sup>   | -3.28e-02 [-3.86e-02 to -2.70e-02] | -1.68e-03 ± 1.59e-02 [-5.01e-03 to 1.65e-03]  | 2.94e-02 [2.37e-02 to 3.52e-02] | 0.96 [0.95 to 0.98] |
|          | Percentage <sup>†</sup> | -9.1 [-10.7 to -7.5]               | -0.3 ± 4.5 [-1.3 to 0.6]                      | 8.4 [6.8 to 10.0]               |                     |
| Skewness | Absolute <sup>†</sup>   | -3.51e-01 [-4.19e-01 to -2.84e-01] | 1.34e-02 ± 1.86e-01 [-2.55e-02 to 5.24e-02]   | 3.78e-01 [3.11e-01 to 4.46e-01] | 0.96 [0.94 to 0.98] |
|          | Percentage <sup>†</sup> | -18.3 [-21.9 to -14.6]             | 1.3 ± 10.0 [-0.8 to 3.4]                      | 21.0 [17.3 to 24.6]             |                     |
| Kurtosis | Absolute <sup>†</sup>   | -1.57e+00 [-1.86e+00 to -1.28e+00] | 2.03e-03 ± 8.01e-01 [-1.66e-01 to 1.70e-01]   | 1.57e+00 [1.28e+00 to 1.86e+00] | 0.95 [0.93 to 0.97] |
|          | Percentage <sup>†</sup> | -27.3 [-32.7 to -21.9]             | 1.6 ± 14.8 [-1.4 to 4.7]                      | 30.6 [25.2 to 35.9]             |                     |
| Mean     | Absolute <sup>†</sup>   | -2.56e+00 [-3.02e+00 to -2.10e+00] | -6.09e-02 ± 1.27e+00 [-3.28e-01 to 2.06e-01]  | 2.44e+00 [1.97e+00 to 2.90e+00] | 0.99 [0.99 to 1.00] |
|          | Percentage <sup>†</sup> | -1.7 [-2.0 to -1.4]                | -0.0 ± 0.8 [-0.2 to 0.1]                      | 1.6 [1.3 to 1.9]                |                     |
| SD       | Absolute <sup>†</sup>   | -3.16e+00 [-3.73e+00 to -2.59e+00] | -8.77e-02 ± 1.57e+00 [-4.16e-01 to 2.41e-01]  | 2.99e+00 [2.42e+00 to 3.56e+00] | 0.95 [0.92 to 0.97] |
|          | Percentage <sup>†</sup> | -20.0 [-23.6 to -16.4]             | -0.5 ± 10.0 [-2.6 to 1.6]                     | 19.0 [15.4 to 22.6]             |                     |
| Skewness | Absolute <sup>†</sup>   | -3.92e-01 [-4.62e-01 to -3.22e-01] | -1.51e-02 ± 1.92e-01 [-5.54e-02 to 2.51e-02]  | 3.62e-01 [2.92e-01 to 4.31e-01] | 0.96 [0.94 to 0.98] |
|          | Percentage <sup>†</sup> | -284.4 [-339.2 to -229.7]          | 120.8 ± 1512.3 [-195.9 to 437.6]              | 3085.0 [2536.4 to 3633.6]       |                     |
| Kurtosis | Absolute <sup>†</sup>   | -2.26e+00 [-2.68e+00 to -1.83e+00] | 4.06e-02 ± 1.17e+00 [-2.05e-01 to 2.86e-01]   | 2.34e+00 [1.91e+00 to 2.76e+00] | 0.96 [0.93 to 0.97] |
|          | Percentage <sup>†</sup> | -28.6 [-34.1 to -23.2]             | 0.8 ± 15.0 [-2.3 to 4.0]                      | 30.3 [24.8 to 35.7]             |                     |
| Mean     | Absolute <sup>†</sup>   | -2.32e+00 [-2.74e+00 to -1.91e+00] | -8.29e-02 ± 1.14e+00 [-3.22e-01 to 1.56e-01]  | 2.16e+00 [1.74e+00 to 2.57e+00] | 0.99 [0.99 to 1.00] |
|          | Percentage <sup>†</sup> | -1.5 [-1.8 to -1.3]                | -0.1 ± 0.8 [-0.2 to 0.1]                      | 1.4 [1.1 to 1.7]                |                     |
| SD       | Absolute <sup>†</sup>   | -3.49e+00 [-4.11e+00 to -2.86e+00] | -8.28e-02 ± 1.74e+00 [-4.46e-01 to 2.81e-01]  | 3.32e+00 [2.69e+00 to 3.95e+00] | 0.94 [0.91 to 0.96] |
|          | Percentage <sup>†</sup> | -22.8 [-26.9 to -18.7]             | -0.4 ± 11.4 [-2.8 to 2.0]                     | 22.0 [17.8 to 26.1]             |                     |
| Skewness | Absolute <sup>†</sup>   | -4.45e-01 [-5.26e-01 to -3.64e-01] | -6.95e-03 ± 2.23e-01 [-5.37e-02 to 3.98e-02]  | 4.31e-01 [3.50e-01 to 5.12e-01] | 0.96 [0.94 to 0.97] |
|          | Percentage <sup>†</sup> | -459.7 [-542.0 to -377.4]          | -15.0 ± 226.9 [-62.5 to 32.5]                 | 429.6 [347.3 to 511.9]          |                     |
| Kurtosis | Absolute <sup>†</sup>   | -2.11e+00 [-2.48e+00 to -1.74e+00] | -1.06e-01 ± 1.02e+00 [-3.20e-01 to 1.08e-01]  | 1.90e+00 [1.53e+00 to 2.27e+00] | 0.97 [0.95 to 0.98] |
|          | Percentage <sup>†</sup> | -30.9 [-36.3 to -25.5]             | -1.8 ± 14.9 [-4.9 to 1.3]                     | 27.3 [21.9 to 32.7]             |                     |
| Mean     | Absolute <sup>†</sup>   | -2.40e+00 [-2.81e+00 to -1.99e+00] | -2.03e-01 ± 1.12e+00 [-4.38e-01 to 3.23e-02]  | 2.00e+00 [1.59e+00 to 2.40e+00] | 1.00 [0.99 to 1.00] |
|          | Percentage <sup>†</sup> | -1.6 [-1.9 to -1.3]                | -0.1 ± 0.7 [-0.3 to 0.0]                      | 1.3 [1.1 to 1.6]                |                     |
| SD       | Absolute <sup>†</sup>   | -3.90e+00 [-4.59e+00 to -3.20e+00] | -1.31e-01 ± 1.92e+00 [-5.34e-01 to 2.71e-01]  | 3.64e+00 [2.94e+00 to 4.33e+00] | 0.93 [0.90 to 0.95] |
|          | Percentage <sup>†</sup> | -24.6 [-29.1 to -20.1]             | -0.5 ± 12.3 [-3.0 to 2.1]                     | 23.7 [19.2 to 28.2]             |                     |
| Skewness | Absolute <sup>†</sup>   | -4.93e-01 [-5.85e-01 to -4.02e-01] | 1.83e-03 ± 2.53e-01 [-5.11e-02 to 5.47e-02]   | 4.97e-01 [4.05e-01 to 5.88e-01] | 0.94 [0.91 to 0.96] |
|          | Percentage <sup>†</sup> | -19118.7 [-22473.3 to -15764.0]    | -994.1 ± 9247.2 [-2930.9 to 942.7]            | 17130.4 [13775.8 to 20485.1]    |                     |
| Kurtosis | Absolute <sup>†</sup>   | -1.51e+00 [-1.78e+00 to -1.24e+00] | -6.09e-02 ± 7.38e-01 [-2.16e-01 to 9.37e-02]  | 1.39e+00 [1.12e+00 to 1.65e+00] | 0.98 [0.97 to 0.98] |
|          | Percentage <sup>†</sup> | -26.9 [-31.6 to -22.2]             | -1.5 ± 12.9 [-4.2 to 1.2]                     | 23.9 [19.2 to 28.6]             |                     |
| Mean     | Absolute <sup>†</sup>   | -2.83e+00 [-3.32e+00 to -2.35e+00] | -2.12e-01 ± 1.34e+00 [-4.92e-01 to 6.84e-02]  | 2.41e+00 [1.92e+00 to 2.90e+00] | 0.99 [0.99 to 1.00] |
|          | Percentage <sup>†</sup> | -2.0 [-2.3 to -1.6]                | -0.1 ± 0.9 [-0.3 to 0.1]                      | 1.7 [1.4 to 2.0]                |                     |
| SD       | Absolute <sup>†</sup>   | -3.51e+00 [-4.13e+00 to -2.90e+00] | -1.92e-01 ± 1.69e+00 [-5.47e-01 to 1.63e-01]  | 3.13e+00 [2.52e+00 to 3.74e+00] | 0.95 [0.92 to 0.97] |
|          | Percentage <sup>†</sup> | -21.8 [-25.6 to -18.0]             | -1.0 ± 10.6 [-3.3 to 1.2]                     | 19.7 [15.9 to 23.5]             |                     |
| Skewness | Absolute <sup>†</sup>   | -6.19e-01 [-7.26e-01 to -5.11e-01] | -3.66e-02 ± 2.97e-01 [-9.88e-02 to 2.56e-02]  | 5.45e-01 [4.38e-01 to 6.53e-01] | 0.94 [0.91 to 0.96] |
|          | Percentage <sup>†</sup> | -505.6 [-597.7 to -413.4]          | -7.7 ± 254.0 [-60.9 to 45.5]                  | 490.1 [398.0 to 582.3]          |                     |
| Kurtosis | Absolute <sup>†</sup>   | -1.90e+00 [-2.24e+00 to -1.55e+00] | -1.03e-02 ± 9.62e-01 [-2.12e-01 to 1.91e-01]  | 1.88e+00 [1.53e+00 to 2.22e+00] | 0.98 [0.96 to 0.98] |
|          | Percentage <sup>†</sup> | -23.9 [-28.4 to -19.4]             | 0.5 ± 12.4 [-2.1 to 3.1]                      | 24.8 [20.3 to 29.3]             |                     |
| Mean     | Absolute <sup>†</sup>   | -2.06e+00 [-2.43e+00 to -1.70e+00] | -7.90e-02 ± 1.01e+00 [-2.91e-01 to 1.33e-01]  | 1.90e+00 [1.54e+00 to 2.27e+00] | 0.99 [0.99 to 1.00] |
|          | Percentage <sup>†</sup> | -1.5 [-1.7 to -1.2]                | -0.1 ± 0.7 [-0.2 to 0.1]                      | 1.4 [1.1 to 1.6]                |                     |
| SD       | Absolute <sup>†</sup>   | -2.63e+00 [-3.10e+00 to -2.16e+00] | -1.07e-01 ± 1.29e+00 [-3.77e-01 to 1.63e-01]  | 2.42e+00 [1.95e+00 to 2.88e+00] | 0.96 [0.94 to 0.98] |
|          | Percentage <sup>†</sup> | -19.4 [-22.9 to -15.9]             | -0.5 ± 9.6 [-2.5 to 1.5]                      | 18.3 [14.8 to 21.8]             |                     |
| Skewness | Absolute <sup>†</sup>   | -3.57e-01 [-4.20e-01 to -2.94e-01] | -1.58e-02 ± 1.74e-01 [-5.22e-02 to 2.07e-02]  | 3.25e-01 [2.62e-01 to 3.89e-01] | 0.96 [0.94 to 0.98] |
|          | Percentage <sup>†</sup> | -282.3 [-339.3 to -225.2]          | 25.9 ± 157.2 [-7.0 to 58.9]                   | 334.1 [277.1 to 391.1]          |                     |
| Kurtosis | Absolute <sup>†</sup>   | -2.78e+00 [-3.31e+00 to -2.26e+00] | 5.45e-02 ± 1.45e+00 [-2.49e-01 to 3.58e-01]   | 2.89e+00 [2.37e+00 to 3.42e+00] | 0.96 [0.94 to 0.97] |
|          | Percentage <sup>†</sup> | -35.2 [-42.0 to -28.5]             | 1.3 ± 18.6 [-2.6 to 5.2]                      | 37.8 [31.0 to 44.6]             |                     |
| Mean     | Absolute <sup>†</sup>   | -1.49e+00 [-1.76e+00 to -1.22e+00] | -2.98e-02 ± 7.44e-01 [-1.86e-01 to 1.26e-01]  | 1.43e+00 [1.16e+00 to 1.70e+00] | 1.00 [0.99 to 1.00] |
|          | Percentage <sup>†</sup> | -1.1 [-1.2 to -0.9]                | -0.0 ± 0.5 [-0.1 to 0.1]                      | 1.0 [0.8 to 1.2]                |                     |
| SD       | Absolute <sup>†</sup>   | -2.47e+00 [-2.90e+00 to -2.04e+00] | -1.47e-01 ± 1.18e+00 [-3.95e-01 to 1.00e-01]  | 2.17e+00 [1.74e+00 to 2.60e+00] | 0.96 [0.94 to 0.97] |
|          | Percentage <sup>†</sup> | -18.2 [-21.5 to -15.0]             | -0.9 ± 8.8 [-2.8 to 0.9]                      | 16.4 [13.2 to 19.6]             |                     |
| Skewness | Absolute <sup>†</sup>   | -3.31e-01 [-3.91e-01 to -2.70e-01] | -2.18e-03 ± 1.68e-01 [-3.73e-02 to 3.29e-02]  | 3.26e-01 [2.65e-01 to 3.87e-01] | 0.96 [0.95 to 0.98] |
|          | Percentage <sup>†</sup> | -1758.1 [-2104.6 to -1411.7]       | 113.4 ± 954.9 [-86.6 to 313.4]                | 1985.0 [1638.6 to 2331.4]       |                     |
| Kurtosis | Absolute <sup>†</sup>   | -2.81e+00 [-3.32e+00 to -2.30e+00] | -5.29e-02 ± 1.41e+00 [-3.48e-01 to 2.42e-01]  | 2.70e+00 [2.19e+00 to 3.21e+00] | 0.96 [0.95 to 0.98] |
|          | Percentage <sup>†</sup> | -35.6 [-42.0 to -29.3]             | -1.4 ± 17.5 [-5.1 to 2.2]                     | 32.8 [26.5 to 39.1]             |                     |
| Mean     | Absolute <sup>†</sup>   | -1.78e+00 [-2.10e+00 to -1.47e+00] | -6.75e-02 ± 8.76e-01 [-2.51e-01 to 1.16e-01]  | 1.65e+00 [1.33e+00 to 1.97e+00] | 1.00 [0.99 to 1.00] |
|          | Percentage <sup>†</sup> | -1.3 [-1.5 to -1.0]                | -0.0 ± 0.6 [-0.2 to 0.1]                      | 1.2 [0.9 to 1.4]                |                     |
| SD       | Absolute <sup>†</sup>   | -3.08e+00 [-3.61e+00 to -2.54e+00] | -1.69e-01 ± 1.48e+00 [-4.80e-01 to 1.42e-01]  | 2.74e+00 [2.20e+00 to 3.28e+00] | 0.94 [0.92 to 0.96] |
|          | Percentage <sup>†</sup> | -21.9 [-25.8 to -18.0]             | -0.8 ± 10.8 [-3.1 to 1.4]                     | 20.2 [16.3 to 24.1]             |                     |
| Skewness | Absolute <sup>†</sup>   | -3.72e-01 [-4.43e-01 to -3.01e-01] | 1.22e-02 ± 1.96e-01 [-2.88e-02 to 5.32e-02]   | 3.96e-01 [3.25e-01 to 4.67e-01] | 0.96 [0.94 to 0.97] |
|          | Percentage <sup>†</sup> | -9233.9 [-10840.1 to -7627.6]      | -555.5 ± 4427.8 [-1482.8 to 371.9]            | 8122.9 [6516.7 to 9729.2]       |                     |
| Kurtosis | Absolute <sup>†</sup>   | -2.19e+00 [-2.58e+00 to -1.80e+00] | -6.93e-02 ± 1.08e+00 [-2.96e-01 to 1.57e-01]  | 2.05e+00 [1.66e+00 to 2.44e+00] | 0.97 [0.96 to 0.98] |
|          | Percentage <sup>†</sup> | -29.4 [-34.7 to -24.2]             | -1.2 ± 14.4 [-4.2 to 1.8]                     | 27.1 [21.8 to 32.3]             |                     |
| Mean     | Absolute <sup>†</sup>   | -2.36e+00 [-2.76e+00 to -1.95e+00] | -1.60e-01 ± 1.12e+00 [-3.94e-01 to 7.48e-02]  | 2.04e+00 [1.63e+00 to 2.44e+00] | 0.99 [0.99 to 1.00] |
|          | Percentage <sup>†</sup> | -1.8 [-2.1 to -1.5]                | -0.1 ± 0.8 [-0.3 to 0.1]                      | 1.5 [1.2 to 1.9]                |                     |
| SD       | Absolute <sup>†</sup>   | -2.46e+00 [-2.87e+00 to -2.05e+00] | -2.38e-01 ± 1.13e+00 [-4.75e-01 to -8.02e-04] | 1.98e+00 [1.57e+00 to 2.39e+00] | 0.97 [0.95 to 0.98] |
|          | Percentage <sup>†</sup> | -17.0 [-19.9 to -14.1]             | -1.5 ± 7.9 [-3.1 to 0.2]                      | 14.1 [11.2 to 16.9]             |                     |
| Skewness | Absolute <sup>†</sup>   | -5.13e-01 [-6.04e-01 to -4.22e-01] | -2.25e-02 ± 2.50e-01 [-7.49e-02 to 3.00e-02]  | 4.68e-01 [3.77e-01 to 5.59e-01] | 0.93 [0.90 to 0.96] |
|          | Percentage <sup>†</sup> | -253.4 [-300.0 to -206.8]          | -1.7 ± 128.4 [-28.6 to 25.2]                  | 250.0 [203.4 to 296.6]          |                     |
| Kurtosis | Absolute <sup>†</sup>   | -3.30e+00 [-3.87e+00 to -2.72e+00] | -2.00e-01 ± 1.58e+00 [-5.31e-01 to 1.30e-01]  | 2.90e+00 [2.32e+00 to 3.47e+00] | 0.96 [0.93 to 0.97] |
|          | Percentage <sup>†</sup> |                                    |                                               |                                 |                     |

| Feature category                          | Feature Name                         | Differences                        | LRL [95% CI]                                 | Mean ± SD [95%]                              | URL [95%]                       | ICC [95% CI]        |
|-------------------------------------------|--------------------------------------|------------------------------------|----------------------------------------------|----------------------------------------------|---------------------------------|---------------------|
| Histogram                                 | Minimum                              | Absolute <sup>†</sup>              | -8.52e+00 [-1.01e+01 to -6.98e+00]           | -1.91e-01 ± 4.25e+00 [-1.08e+00 to 6.99e-01] | 8.14e+00 [6.60e+00 to 9.68e+00] | 0.98 [0.97 to 0.99] |
|                                           |                                      | Percentage <sup>†</sup>            | -79.3 [-93.1 to -65.6]                       | -4.9 ± 38.0 [-12.9 to 3.0]                   | 69.5 [55.7 to 83.3]             |                     |
|                                           | Maximum                              | Absolute <sup>†</sup>              | -4.27e+01 [-5.10e+01 to -3.44e+01]           | 2.04e+00 ± 2.28e+01 [-2.74e+00 to 6.82e+00]  | 4.68e+01 [3.85e+01 to 5.51e+01] | 1.00 [1.00 to 1.00] |
|                                           |                                      | Percentage <sup>†</sup>            | -12.9 [-15.4 to -10.5]                       | 0.3 ± 6.7 [-1.1 to 1.7]                      | 13.5 [11.0 to 15.9]             |                     |
|                                           | Mean                                 | Absolute <sup>†</sup>              | -2.46e+00 [-2.91e+00 to -2.02e+00]           | -5.99e-02 ± 1.23e+00 [-3.17e-01 to 1.97e-01] | 2.34e+00 [1.90e+00 to 2.79e+00] | 1.00 [1.00 to 1.00] |
|                                           |                                      | Percentage <sup>†</sup>            | -7.0 [-8.3 to -5.8]                          | -0.3 ± 3.4 [-1.0 to 0.4]                     | 6.5 [5.2 to 7.7]                |                     |
|                                           | Range                                | Absolute <sup>†</sup>              | -4.15e+01 [-4.96e+01 to -3.34e+01]           | 2.23e+00 ± 2.23e+01 [-2.44e+00 to 6.90e+00]  | 4.59e+01 [3.78e+01 to 5.40e+01] | 1.00 [1.00 to 1.00] |
|                                           |                                      | Percentage <sup>†</sup>            | -16.0 [-19.1 to -12.9]                       | 0.5 ± 8.4 [-1.2 to 2.3]                      | 17.0 [14.0 to 20.1]             |                     |
|                                           | Standard deviation                   | Absolute <sup>†</sup>              | -2.66e+00 [-3.18e+00 to -2.15e+00]           | 1.25e-01 ± 1.42e+00 [-1.72e-01 to 4.23e-01]  | 2.91e+00 [2.40e+00 to 3.43e+00] | 1.00 [1.00 to 1.00] |
|                                           |                                      | Percentage <sup>†</sup>            | -13.4 [-15.8 to -10.9]                       | -0.2 ± 6.7 [-1.6 to 1.2]                     | 12.9 [10.5 to 15.4]             |                     |
|                                           | Variance                             | Absolute <sup>†</sup>              | -3.95e+02 [-4.74e+02 to -3.17e+02]           | 2.96e+01 ± 2.17e+02 [-1.58e+01 to 7.50e+01]  | 4.55e+02 [3.76e+02 to 5.33e+02] | 1.00 [1.00 to 1.00] |
|                                           |                                      | Percentage <sup>†</sup>            | -26.4 [-31.3 to -21.6]                       | -0.4 ± 13.3 [-3.2 to 2.4]                    | 25.6 [20.8 to 30.4]             |                     |
|                                           | Median                               | Absolute <sup>†</sup>              | -1.94e+00 [-2.29e+00 to -1.59e+00]           | -3.32e-02 ± 9.72e-01 [-2.37e-01 to 1.71e-01] | 1.87e+00 [1.52e+00 to 2.23e+00] | 1.00 [1.00 to 1.00] |
|                                           |                                      | Percentage <sup>†</sup>            | -6.2 [-7.3 to -5.1]                          | -0.3 ± 3.0 [-0.9 to 0.4]                     | 5.7 [4.6 to 6.8]                |                     |
|                                           | Skewness                             | Absolute <sup>†</sup>              | -5.82e-01 [-6.91e-01 to -4.72e-01]           | 1.17e-02 ± 3.03e-01 [-5.17e-02 to 7.51e-02]  | 6.05e-01 [4.95e-01 to 7.15e-01] | 0.96 [0.94 to 0.97] |
|                                           |                                      | Percentage <sup>†</sup>            | -444.5 [-524.1 to -364.9]                    | -14.4 ± 219.5 [-60.3 to 31.6]                | 415.8 [336.2 to 495.4]          |                     |
|                                           | Kurtosis                             | Absolute <sup>†</sup>              | -2.35e+00 [-2.82e+00 to -1.88e+00]           | 1.90e-01 ± 1.30e+00 [-8.19e-02 to 4.62e-01]  | 2.73e+00 [2.26e+00 to 3.20e+00] | 0.93 [0.90 to 0.96] |
|                                           |                                      | Percentage <sup>†</sup>            | -510.1 [-609.7 to -410.5]                    | 28.1 ± 274.6 [-29.4 to 85.6]                 | 566.4 [466.7 to 666.0]          |                     |
|                                           | Root mean squared                    | Absolute <sup>†</sup>              | -2.35e+00 [-2.78e+00 to -1.92e+00]           | -3.01e-02 ± 1.18e+00 [-2.78e-01 to 2.18e-01] | 2.29e+00 [1.86e+00 to 2.72e+00] | 1.00 [1.00 to 1.00] |
|                                           |                                      | Percentage <sup>†</sup>            | -6.9 [-8.2 to -5.7]                          | -0.3 ± 3.4 [-1.0 to 0.4]                     | 6.4 [5.2 to 7.6]                |                     |
|                                           | Energy                               | Absolute <sup>†</sup>              | -1.85e+09 [-2.20e+09 to -1.49e+09]           | 9.12e+07 ± 9.88e+08 [-1.16e+08 to 2.98e+08]  | 2.03e+09 [1.67e+09 to 2.39e+09] | 1.00 [0.99 to 1.00] |
|                                           |                                      | Percentage <sup>†</sup>            | -29.9 [-35.8 to -24.0]                       | 1.9 ± 16.2 [-1.5 to 5.3]                     | 33.7 [27.8 to 39.6]             |                     |
|                                           | Mean absolute deviation              | Absolute <sup>†</sup>              | -2.19e+00 [-2.61e+00 to -1.77e+00]           | 7.90e-02 ± 1.16e+00 [-1.64e-01 to 3.22e-01]  | 2.35e+00 [1.93e+00 to 2.77e+00] | 1.00 [1.00 to 1.00] |
|                                           |                                      | Percentage <sup>†</sup>            | -17.9 [-21.1 to -14.7]                       | -0.6 ± 8.8 [-2.4 to 1.3]                     | 16.8 [13.6 to 20.0]             |                     |
|                                           | Median absolute deviation            | Absolute <sup>†</sup>              | -2.12e+00 [-2.52e+00 to -1.72e+00]           | 6.48e-02 ± 1.11e+00 [-1.69e-01 to 2.98e-01]  | 2.25e+00 [1.84e+00 to 2.65e+00] | 1.00 [1.00 to 1.00] |
|                                           |                                      | Percentage <sup>†</sup>            | -17.5 [-20.6 to -14.4]                       | -0.6 ± 8.6 [-2.4 to 1.2]                     | 16.3 [13.2 to 19.5]             |                     |
|                                           | 10 <sup>th</sup> percentile          | Absolute <sup>†</sup>              | -4.69e+00 [-5.53e+00 to -3.84e+00]           | -1.34e-01 ± 2.32e+00 [-6.21e-01 to 3.52e-01] | 4.42e+00 [3.58e+00 to 5.26e+00] | 1.00 [1.00 to 1.00] |
|                                           |                                      | Percentage <sup>†</sup>            | -7.3 [-8.6 to -6.0]                          | -0.1 ± 3.7 [-0.9 to 0.6]                     | 7.0 [5.7 to 8.4]                |                     |
|                                           | 90 <sup>th</sup> percentile          | Absolute <sup>†</sup>              | -5.10e+00 [-6.06e+00 to -4.14e+00]           | 7.16e-02 ± 2.64e+00 [-4.81e-01 to 6.24e-01]  | 5.24e+00 [4.29e+00 to 6.20e+00] | 1.00 [1.00 to 1.00] |
|                                           |                                      | Percentage <sup>†</sup>            | -11.1 [-13.1 to -9.1]                        | -0.2 ± 5.5 [-1.4 to 0.9]                     | 10.6 [8.6 to 12.6]              |                     |
|                                           | Robust mean absolute deviation       | Absolute <sup>†</sup>              | -1.39e+00 [-1.66e+00 to -1.13e+00]           | 2.26e-02 ± 7.23e-01 [-1.29e-01 to 1.74e-01]  | 1.44e+00 [1.18e+00 to 1.70e+00] | 1.00 [1.00 to 1.00] |
|                                           |                                      | Percentage <sup>†</sup>            | -25.2 [-29.7 to -20.7]                       | -0.8 ± 12.4 [-3.4 to 1.8]                    | 23.5 [19.0 to 28.0]             |                     |
|                                           | Robust median absolute deviation     | Absolute <sup>†</sup>              | -1.33e+00 [-1.58e+00 to -1.08e+00]           | 1.46e-02 ± 6.88e-01 [-1.29e-01 to 1.59e-01]  | 1.36e+00 [1.11e+00 to 1.61e+00] | 1.00 [1.00 to 1.00] |
|                                           |                                      | Percentage <sup>†</sup>            | -24.2 [-28.6 to -19.9]                       | -0.9 ± 11.9 [-3.4 to 1.6]                    | 22.5 [18.1 to 26.8]             |                     |
|                                           | Interquartile range                  | Absolute <sup>†</sup>              | -3.57e+00 [-4.23e+00 to -2.90e+00]           | 3.36e-02 ± 1.84e+00 [-3.51e-01 to 4.18e-01]  | 3.63e+00 [2.97e+00 to 4.30e+00] | 1.00 [1.00 to 1.00] |
|                                           |                                      | Percentage <sup>†</sup>            | -25.6 [-30.1 to -21.0]                       | -1.2 ± 12.4 [-3.8 to 1.4]                    | 23.2 [18.7 to 27.7]             |                     |
|                                           | Coefficient of dispersion            | Absolute <sup>†</sup>              | -2.83e-02 [-3.33e-02 to -2.33e-02]           | -1.29e-03 ± 1.38e-02 [-4.18e-03 to 1.60e-03] | 2.57e-02 [2.07e-02 to 3.08e-02] | 0.98 [0.96 to 0.98] |
| Percentage <sup>†</sup>                   |                                      | -21.0 [-24.8 to -17.3]             | -0.9 ± 10.3 [-3.0 to 1.3]                    | 19.3 [15.6 to 23.1]                          |                                 |                     |
| Coefficient of variation                  | Absolute <sup>†</sup>                | -2.65e-02 [-3.14e-02 to -2.15e-02] | 4.75e-04 ± 1.37e-02 [-2.40e-03 to 3.35e-03]  | 2.74e-02 [2.24e-02 to 3.24e-02]              | 0.99 [0.99 to 0.99]             |                     |
|                                           | Percentage <sup>†</sup>              | -12.3 [-14.6 to -10.0]             | 0.1 ± 6.3 [-1.2 to 1.4]                      | 12.4 [10.1 to 14.7]                          |                                 |                     |
| GLCM                                      | Energy                               | Absolute <sup>†</sup>              | -3.65e-04 [-4.39e-04 to -2.91e-04]           | 3.28e-05 ± 2.03e-04 [-9.72e-06 to 7.53e-05]  | 4.31e-04 [3.57e-04 to 5.04e-04] | 0.96 [0.93 to 0.97] |
|                                           |                                      | Percentage <sup>†</sup>            | -33.7 [-40.6 to -26.8]                       | 3.5 ± 19.0 [-0.4 to 7.5]                     | 40.8 [33.9 to 47.7]             |                     |
|                                           | Entropy                              | Absolute <sup>†</sup>              | -5.03e-01 [-5.89e-01 to -4.17e-01]           | -3.69e-02 ± 2.38e-01 [-8.67e-02 to 1.29e-02] | 4.29e-01 [3.43e-01 to 5.15e-01] | 0.95 [0.92 to 0.97] |
|                                           |                                      | Percentage <sup>†</sup>            | -4.5 [-5.3 to -3.7]                          | -0.3 ± 2.1 [-0.8 to 0.1]                     | 3.8 [3.1 to 4.6]                |                     |
|                                           | Contrast                             | Absolute <sup>†</sup>              | -4.78e+01 [-5.62e+01 to -3.94e+01]           | -2.52e+00 ± 2.31e+01 [-7.36e+00 to 2.31e+00] | 4.27e+01 [3.44e+01 to 5.11e+01] | 0.96 [0.93 to 0.97] |
|                                           |                                      | Percentage <sup>†</sup>            | -28.2 [-33.1 to -23.3]                       | -1.5 ± 13.6 [-4.3 to 1.4]                    | 25.2 [20.3 to 30.2]             |                     |
|                                           | Homogeneity                          | Absolute <sup>†</sup>              | -2.90e-02 [-3.49e-02 to -2.31e-02]           | 2.90e-03 ± 1.63e-02 [-5.12e-04 to 6.30e-03]  | 3.48e-02 [2.89e-02 to 4.07e-02] | 0.96 [0.94 to 0.97] |
|                                           |                                      | Percentage <sup>†</sup>            | -15.0 [-18.1 to -11.9]                       | 1.6 ± 8.5 [-0.2 to 3.4]                      | 18.2 [15.2 to 21.3]             |                     |
|                                           | Correlation                          | Absolute <sup>†</sup>              | -1.45e-02 [-1.71e-02 to -1.18e-02]           | -1.54e-04 ± 7.30e-03 [-1.68e-03 to 1.37e-03] | 1.42e-02 [1.15e-02 to 1.68e-02] | 0.99 [0.99 to 1.00] |
|                                           |                                      | Percentage <sup>†</sup>            | -1.7 [-2.0 to -1.4]                          | -0.0 ± 0.8 [-0.2 to 0.2]                     | 1.6 [1.3 to 1.9]                |                     |
|                                           | Dissimilarity                        | Absolute <sup>†</sup>              | -1.47e+00 [-1.72e+00 to -1.21e+00]           | -9.95e-02 ± 6.97e-01 [-2.46e-01 to 4.65e-02] | 1.27e+00 [1.01e+00 to 1.52e+00] | 0.95 [0.93 to 0.97] |
|                                           |                                      | Percentage <sup>†</sup>            | -18.4 [-21.6 to -15.2]                       | -1.2 ± 8.8 [-3.0 to 0.6]                     | 16.0 [12.8 to 19.2]             |                     |
|                                           | Sum average                          | Absolute <sup>†</sup>              | -1.63e+01 [-1.94e+01 to -1.33e+01]           | 1.34e-01 ± 8.41e+00 [-1.63e+00 to 1.89e+00]  | 1.66e+01 [1.36e+01 to 1.97e+01] | 0.97 [0.95 to 0.98] |
|                                           |                                      | Percentage <sup>†</sup>            | -14.5 [-17.2 to -11.8]                       | 0.1 ± 7.5 [-1.5 to 1.7]                      | 14.7 [12.0 to 17.4]             |                     |
|                                           | Sum variance                         | Absolute <sup>†</sup>              | -6.04e+02 [-7.09e+02 to -4.98e+02]           | -3.19e+01 ± 2.92e+02 [-9.30e+01 to 2.91e+01] | 5.40e+02 [4.34e+02 to 6.45e+02] | 0.95 [0.93 to 0.97] |
|                                           |                                      | Percentage <sup>†</sup>            | -26.1 [-30.6 to -21.6]                       | -1.7 ± 12.5 [-4.3 to 0.9]                    | 22.7 [18.2 to 27.3]             |                     |
|                                           | Sum entropy                          | Absolute <sup>†</sup>              | -2.32e-01 [-2.71e-01 to -1.92e-01]           | -1.62e-02 ± 1.10e-01 [-3.92e-02 to 6.85e-03] | 1.99e-01 [1.59e-01 to 2.39e-01] | 0.96 [0.94 to 0.97] |
|                                           |                                      | Percentage <sup>†</sup>            | -3.2 [-3.8 to -2.7]                          | -0.2 ± 1.5 [-0.5 to 0.1]                     | 2.8 [2.2 to 3.3]                |                     |
|                                           | Cluster shade                        | Absolute <sup>†</sup>              | -4.68e+04 [-5.54e+04 to -3.82e+04]           | -1.35e+02 ± 2.38e+04 [-5.12e+03 to 4.85e+03] | 4.65e+04 [3.79e+04 to 5.52e+04] | 0.98 [0.97 to 0.99] |
|                                           |                                      | Percentage <sup>†</sup>            | -150.0 [-176.6 to -123.4]                    | -6.2 ± 73.3 [-21.6 to 9.1]                   | 137.5 [110.9 to 164.1]          |                     |
|                                           | Cluster prominence                   | Absolute <sup>†</sup>              | -6.84e+06 [-8.04e+06 to -5.64e+06]           | -3.48e+05 ± 3.31e+06 [-1.04e+06 to 3.46e+05] | 6.14e+06 [4.94e+06 to 7.34e+06] | 0.97 [0.95 to 0.98] |
|                                           |                                      | Percentage <sup>†</sup>            | -30.9 [-36.2 to -25.6]                       | -2.1 ± 14.7 [-5.2 to 1.0]                    | 26.7 [21.3 to 32.0]             |                     |
|                                           | Harlick's correlation                | Absolute <sup>†</sup>              | -3.28e+07 [-3.85e+07 to -2.71e+07]           | -1.95e+06 ± 1.57e+07 [-5.25e+06 to 1.34e+06] | 2.89e+07 [2.32e+07 to 3.46e+07] | 0.99 [0.98 to 0.99] |
|                                           |                                      | Percentage <sup>†</sup>            | -43.3 [-50.8 to -35.8]                       | -2.9 ± 20.6 [-7.2 to 1.4]                    | 37.6 [30.1 to 45.1]             |                     |
|                                           | Joint maximum                        | Absolute <sup>†</sup>              | -1.22e-03 [-1.45e-03 to -9.90e-04]           | 2.31e-05 ± 6.34e-04 [-1.10e-04 to 1.56e-04]  | 1.27e-03 [1.04e-03 to 1.50e-03] | 0.95 [0.93 to 0.97] |
|                                           |                                      | Percentage <sup>†</sup>            | -21.7 [-25.9 to -17.6]                       | 0.7 ± 11.4 [-1.7 to 3.1]                     | 23.1 [18.9 to 27.2]             |                     |
|                                           | Joint average                        | Absolute <sup>†</sup>              | -8.17e+00 [-9.69e+00 to -6.65e+00]           | 6.70e-02 ± 4.20e+00 [-8.13e-01 to 9.47e-01]  | 8.30e+00 [6.78e+00 to 9.83e+00] | 0.97 [0.95 to 0.98] |
|                                           |                                      | Percentage <sup>†</sup>            | -14.5 [-17.2 to -11.8]                       | 0.1 ± 7.5 [-1.5 to 1.7]                      | 14.7 [12.0 to 17.4]             |                     |
|                                           | Joint variance                       | Absolute <sup>†</sup>              | -1.62e+02 [-1.90e+02 to -1.33e+02]           | -8.62e+00 ± 7.81e+01 [-2.50e+01 to 7.73e+00] | 1.44e+02 [1.16e+02 to 1.73e+02] | 0.95 [0.92 to 0.97] |
|                                           |                                      | Percentage <sup>†</sup>            | -26.1 [-30.6 to -21.6]                       | -1.7 ± 12.5 [-4.3 to 0.9]                    | 22.8 [18.2 to 27.3]             |                     |
|                                           | Inverse difference                   | Absolute <sup>†</sup>              | -2.90e-02 [-3.50e-02 to -2.31e-02]           | 2.88e-03 ± 1.63e-02 [-5.33e-04 to 6.29e-03]  | 3.48e-02 [2.89e-02 to 4.07e-02] | 0.96 [0.93 to 0.97] |
|                                           |                                      | Percentage <sup>†</sup>            | -10.7 [-12.9 to -8.5]                        | 1.1 ± 6.0 [-0.2 to 2.4]                      | 12.9 [10.7 to 15.1]             |                     |
|                                           | Normalized Inverse difference        | Absolute <sup>†</sup>              | -7.94e-03 [-9.54e-03 to -6.35e-03]           | 6.53e-04 ± 4.39e-03 [-2.66e-04 to 1.57e-03]  | 9.25e-03 [7.66e-03 to 1.08e-02] | 0.95 [0.93 to 0.97] |
|                                           |                                      | Percentage <sup>†</sup>            | -0.8 [-1.0 to -0.7]                          | 0.1 ± 0.5 [-0.0 to 0.2]                      | 1.0 [0.8 to 1.1]                |                     |
|                                           | Normalized inverse difference moment | Absolute <sup>†</sup>              | -2.32e-03 [-2.78e-03 to -1.87e-03]           | 1.43e-04 ± 1.26e-03 [-1.21e-04 to 4.06e-04]  | 2.61e-03 [2.15e-03 to 3.07e-03] | 0.96 [0.93 to 0.97] |
|                                           |                                      | Percentage <sup>†</sup>            | -0.2 [-0.3 to -0.2]                          | 0.0 ± 0.1 [-0.0 to 0.0]                      | 0.3 [0.2 to 0.3]                |                     |
|                                           | Inverse variance                     | Absolute <sup>†</sup>              | -2.67e-02 [-3.22e-02 to -2.13e-02]           | 2.76e-03 ± 1.50e-02 [-3.93e-04 to 5.91e-03]  | 3.22e-02 [2.68e-02 to 3.77e-02] | 0.96 [0.94 to 0.97] |
| Percentage <sup>†</sup>                   |                                      | -14.4 [-17.3 to -11.4]             | 1.6 ± 8.2 [-0.1 to 3.3]                      | 17.6 [14.6 to 20.5]                          |                                 |                     |
| Difference entropy                        | Absolute <sup>†</sup>                | -2.70e-01 [-3.16e-01 to -2.23e-01] | -1.82e-02 ± 1.28e-01 [-4.51e-02 to 8.65e-03] | 2.33e-01 [1.87e-01 to 2.80e-01]              | 0.96 [0.94 to 0.97]             |                     |
|                                           | Percentage <sup>†</sup>              | -6.2 [-7.3 to -5.1]                | -0.4 ± 3.0 [-1.0 to 0.2]                     | 5.4 [4.3 to 6.5]                             |                                 |                     |
| Difference variance                       | Absolute <sup>†</sup>                | -2.34e+01 [-2.75e+01 to -1.92e+01] | -8.30e-01 ± 1.15e+01 [-3.24e+00 to 1.58e+00] | 2.17e+01 [1.75e+01 to 2.59e+01]              | 0.97 [0.95 to 0.98]             |                     |
|                                           | Percentage <sup>†</sup>              | -24.1 [-28.4 to -19.8]             | -0.9 ± 11.9 [-3.3 to 1.6]                    | 22.4 [18.1 to 26.7]                          |                                 |                     |
| Difference average                        | Absolute <sup>†</sup>                | -1.47e+00 [-1.72e+00 to -1.21e+00] | -9.95e-02 ± 6.97e-01 [-2.46e-01 to 4.65e-02] | 1.27e+00 [1.01e+00 to 1.52e+00]              | 0.95 [0.93 to 0.97]             |                     |
|                                           | Percentage <sup>†</sup>              | -18.4 [-21.6 to -15.2]             | -1.2 ± 8.8 [-3.0 to 0.6]                     | 16.0 [12.8 to 19.2]                          |                                 |                     |
| Cluster tendency                          | Absolute <sup>†</sup>                | -6.04e+02 [-7.09e+02 to -4.98e+02] | -3.19e+01 ± 2.92e+02 [-9.30e+01 to 2.91e+01] | 5.40e+02 [4.34e+02 to 6.45e+02]              | 0.95 [0.93 to 0.97]             |                     |
|                                           | Percentage <sup>†</sup>              | -26.1 [-30.6 to -21.6]             | -1.7 ± 12.5 [-4.3 to 0.9]                    | 22.7 [18.2 to 27.3]                          |                                 |                     |
| Autocorrelation                           | Absolute <sup>†</sup>                | -9.17e+02 [-1.09e+03 to -7.47e+02] | -9.32e-02 ± 4.68e+02 [-9.80e+01 to 9.79e+01] | 9.17e+02 [7.47e+02 to 1.09e+03]              | 0.96 [0.94 to 0.97]             |                     |
|                                           | Percentage <sup>†</sup>              | -24.9 [-29.5 to -20.3]             | -0.0 ± 12.7 [-2.7 to 2.7]                    | 24.9 [20.3 to 29.5]                          |                                 |                     |
| First measure of information correlation  | Absolute <sup>†</sup>                | -1.74e-02 [-2.04e-02 to -1.44e-02] | -1.18e-03 ± 8.27e-03 [-2.92e-03 to 5.48e-04] | 1.50e-02 [1.20e-02 to 1.80e-02]              | 0.99 [0.98 to 0.99]             |                     |
|                                           | Percentage <sup>†</sup>              | -7.8 [-9.4 to -6.2]                | 0.6 ± 4.3 [-0.3 to 1.5]                      | 9.1 [7.5 to 10.6]                            |                                 |                     |
| Second measure of information correlation | Absolute <sup>†</sup>                | -7.17e-03 [-8.57e-03 to -5.77e-03] | 3.96e-04 ± 3.86e-03 [-4.12e-04 to 1.20e-03]  | 7.96e-03 [6.56e-03 to 9.36e-03]              | 0.99 [0.99 to 0.99]             |                     |
|                                           | Percentage <sup>†</sup>              | -0.8 [-0.9 to -0.6]                | 0.0 ± 0.4 [-0.0 to 0.1]                      | 0.8 [0.7 to 1.0]                             |                                 |                     |
| SAE                                       | Absolute <sup>†</sup>                | -1.80e-02 [-2.12e-02 to -1.47e-02] | -5.47e-04 ± 8.88e-03 [-2.41e-03 to 1.31e-03] | 1.69e-02 [1.36e-02 to 2.01e-02]              | 0.98 [0.97 to 0.99]             |                     |
|                                           | Percentage <sup>†</sup>              | -2.5 [-3.0 to -2.1]                | -0.1 ± 1.2 [-0.3 to 0.2]                     | 2.4 [1.9 to 2.8]                             |                                 |                     |
| LAE                                       | Absolute <sup>†</sup>                | -3.40e+02 [-4.04e+02 to -2.75e+02] | 9.88e+00 ± 1.78e+02 [-2.75e+01 to 4.72e+01]  | 3.59e+02 [2.95e+02 to 4.24e+02]              | 0.98 [0.96 to 0.98]             |                     |
|                                           | Percentage <sup>†</sup>              | -77.5 [-92.8 to -62.2]             | 5.1 ± 42.2 [-3.7 to 14.0]                    | 87.8 [72.5 to 103.1]                         |                                 |                     |
| GLN                                       | Absolute <sup>†</sup>                | -2.16e+02 [-2.57e+02 to -1.75e+02] | 5.82e+00 ± 1.13e+02 [-1.79e+01 to 2.95e+01]  | 2.28e+02 [1.87e+02 to 2.69e+02]              | 0.99 [0.98 to 0.99]             |                     |
|                                           | Percentage <sup>†</sup>              | -33.5 [-40.0 to -27.0]             | 1.6 ± 17.9                                   |                                              |                                 |                     |

|                              |                              |                                    |                                             |                                              |                                              |                                 |                     |
|------------------------------|------------------------------|------------------------------------|---------------------------------------------|----------------------------------------------|----------------------------------------------|---------------------------------|---------------------|
| GLSZM                        | ZP                           | Absolute <sup>†</sup>              | -7.12e-02 [-8.34e-02 to -5.90e-02]          | -5.25e-03 ± 3.37e-02 [-1.23e-02 to 1.80e-03] | 6.07e-02 [4.85e-02 to 7.29e-02]              | 0.96 [0.94 to 0.97]             |                     |
|                              |                              | Percentage <sup>†</sup>            | -17.0 [-20.0 to -14.1]                      | -1.1 ± 8.1 [-2.8 to 0.6]                     | 14.8 [11.9 to 17.8]                          |                                 |                     |
|                              | LGLZE                        | Absolute <sup>†</sup>              | -8.24e-04 [-9.80e-04 to -6.68e-04]          | 1.89e-05 ± 4.30e-04 [-7.12e-05 to 1.09e-04]  | 8.62e-04 [7.06e-04 to 1.02e-03]              | 0.97 [0.96 to 0.98]             |                     |
|                              |                              | Percentage <sup>†</sup>            | -29.8 [-35.5 to -24.2]                      | 0.6 ± 15.5 [-2.6 to 3.9]                     | 31.0 [25.4 to 36.7]                          |                                 |                     |
|                              | HGLZE                        | Absolute <sup>†</sup>              | -8.37e+02 [-9.95e+02 to -6.80e+02]          | 1.25e+01 ± 4.34e+02 [-7.83e+01 to 1.03e+02]  | 8.62e+02 [7.05e+02 to 1.02e+03]              | 0.94 [0.91 to 0.96]             |                     |
|                              |                              | Percentage <sup>†</sup>            | -19.7 [-23.4 to -16.0]                      | 0.3 ± 10.2 [-1.8 to 2.5]                     | 20.4 [16.6 to 24.1]                          |                                 |                     |
|                              | SALGLE                       | Absolute <sup>†</sup>              | -4.87e-04 [-5.78e-04 to -3.96e-04]          | 2.35e-06 ± 2.50e-04 [-4.99e-05 to 5.47e-05]  | 4.92e-04 [4.01e-04 to 5.82e-04]              | 0.97 [0.95 to 0.98]             |                     |
|                              |                              | Percentage <sup>†</sup>            | -31.4 [-37.2 to -25.6]                      | -0.1 ± 16.0 [-3.5 to 3.2]                    | 31.1 [25.4 to 36.9]                          |                                 |                     |
|                              | SAHGLE                       | Absolute <sup>†</sup>              | -5.40e+02 [-6.41e+02 to -4.38e+02]          | 7.12e+00 ± 2.79e+02 [-5.13e+01 to 6.56e+01]  | 5.54e+02 [4.53e+02 to 6.55e+02]              | 0.94 [0.91 to 0.96]             |                     |
|                              |                              | Percentage <sup>†</sup>            | -17.6 [-21.0 to -14.3]                      | 0.3 ± 9.2 [-1.6 to 2.2]                      | 18.2 [14.9 to 21.6]                          |                                 |                     |
|                              | LALGLE                       | Absolute <sup>†</sup>              | -1.35e+01 [-1.60e+01 to -1.10e+01]          | -8.91e-02 ± 6.85e+00 [-1.52e+00 to 1.35e+00] | 1.33e+01 [1.08e+01 to 1.58e+01]              | 0.90 [0.84 to 0.93]             |                     |
|                              |                              | Percentage <sup>†</sup>            | -95.1 [-112.4 to -77.8]                     | -1.8 ± 47.6 [-11.8 to 8.1]                   | 91.4 [74.2 to 108.7]                         |                                 |                     |
|                              | LAHGLE                       | Absolute <sup>†</sup>              | -8.13e+05 [-9.70e+05 to -6.55e+05]          | 3.98e+04 ± 4.35e+05 [-5.13e+04 to 1.31e+05]  | 8.92e+05 [7.35e+05 to 1.05e+06]              | 0.92 [0.89 to 0.95]             |                     |
|                              |                              | Percentage <sup>†</sup>            | -85.2 [-101.5 to -68.9]                     | 3.0 ± 45.0 [-6.4 to 12.4]                    | 91.2 [74.9 to 107.5]                         |                                 |                     |
|                              | GLV                          | Absolute <sup>†</sup>              | -9.45e+01 [-1.11e+02 to -7.82e+01]          | -6.25e+00 ± 4.50e+01 [-1.57e+01 to 3.18e+00] | 8.20e+01 [6.57e+01 to 9.83e+01]              | 0.98 [0.97 to 0.99]             |                     |
|                              |                              | Percentage <sup>†</sup>            | -14.0 [-16.4 to -11.6]                      | -1.0 ± 6.6 [-2.4 to 0.4]                     | 12.0 [9.6 to 14.4]                           |                                 |                     |
| SZV                          | Absolute <sup>†</sup>        | -3.38e+02 [-4.02e+02 to -2.74e+02] | 9.78e+00 ± 1.77e+02 [-2.74e+01 to 4.69e+01] | 3.58e+02 [2.93e+02 to 4.22e+02]              | 0.98 [0.96 to 0.98]                          |                                 |                     |
|                              | Percentage <sup>†</sup>      | -79.9 [-95.6 to -64.1]             | 5.3 ± 43.5 [-3.8 to 14.4]                   | 90.5 [74.7 to 106.3]                         |                                              |                                 |                     |
| Sobel                        | Mean                         | Absolute <sup>†</sup>              | -7.77e+00 [-9.25e+00 to -6.29e+00]          | 2.19e-01 ± 4.08e+00 [-6.35e-01 to 1.07e+00]  | 8.21e+00 [6.73e+00 to 9.69e+00]              | 1.00 [1.00 to 1.00]             |                     |
|                              |                              | Percentage <sup>†</sup>            | -19.5 [-22.9 to -16.0]                      | -0.6 ± 9.6 [-2.6 to 1.4]                     | 18.2 [14.7 to 21.7]                          |                                 |                     |
|                              | SD                           | Absolute <sup>†</sup>              | -9.00e+00 [-1.08e+01 to -7.22e+00]          | 6.13e-01 ± 4.90e+00 [-4.15e-01 to 1.64e+00]  | 1.02e+01 [8.45e+00 to 1.20e+01]              | 1.00 [1.00 to 1.00]             |                     |
|                              |                              | Percentage <sup>†</sup>            | -15.0 [-17.8 to -12.1]                      | 0.4 ± 7.9 [-1.2 to 2.1]                      | 15.8 [13.0 to 18.7]                          |                                 |                     |
|                              | Skewness                     | Absolute <sup>†</sup>              | -4.95e-01 [-5.89e-01 to -4.02e-01]          | 1.02e-02 ± 2.58e-01 [-4.38e-02 to 6.42e-02]  | 5.16e-01 [4.22e-01 to 6.09e-01]              | 0.96 [0.95 to 0.98]             |                     |
|                              |                              | Percentage <sup>†</sup>            | -17.6 [-21.0 to -14.3]                      | 0.7 ± 9.4 [-1.3 to 2.7]                      | 19.0 [15.6 to 22.4]                          |                                 |                     |
|                              | Kurtosis                     | Absolute <sup>†</sup>              | -4.80e+00 [-5.67e+00 to -3.92e+00]          | -5.08e-02 ± 2.42e+00 [-5.58e-01 to 4.56e-01] | 4.69e+00 [3.82e+00 to 5.57e+00]              | 0.96 [0.94 to 0.97]             |                     |
|                              |                              | Percentage <sup>†</sup>            | -29.8 [-35.3 to -24.2]                      | 0.3 ± 15.4 [-2.9 to 3.6]                     | 30.4 [24.9 to 36.0]                          |                                 |                     |
|                              | LoG                          | Mean                               | Absolute <sup>†</sup>                       | -2.87e-02 [-3.35e-02 to -2.38e-02]           | -2.46e-03 ± 1.34e-02 [-5.26e-03 to 3.41e-04] | 2.38e-02 [1.89e-02 to 2.86e-02] | 0.98 [0.97 to 0.99] |
|                              |                              |                                    | Percentage <sup>†</sup>                     | -14.7 [-17.2 to -12.2]                       | -1.2 ± 6.9 [-2.6 to 0.3]                     | 12.4 [9.9 to 14.9]              |                     |
| SD                           |                              | Absolute <sup>†</sup>              | -2.15e-02 [-2.52e-02 to -1.78e-02]          | -1.71e-03 ± 1.01e-02 [-3.83e-03 to 4.05e-04] | 1.81e-02 [1.44e-02 to 2.18e-02]              | 0.99 [0.98 to 0.99]             |                     |
|                              |                              | Percentage <sup>†</sup>            | -5.6 [-6.6 to -4.7]                         | -0.4 ± 2.7 [-1.0 to 0.1]                     | 4.8 [3.8 to 5.8]                             |                                 |                     |
| Skewness                     |                              | Absolute <sup>†</sup>              | -2.02e-01 [-2.43e-01 to -1.61e-01]          | 1.80e-02 ± 1.12e-01 [-5.52e-03 to 4.15e-02]  | 2.38e-01 [1.97e-01 to 2.79e-01]              | 0.99 [0.98 to 0.99]             |                     |
|                              |                              | Percentage <sup>†</sup>            | -12.7 [-15.3 to -10.1]                      | 1.3 ± 7.2 [-0.2 to 2.8]                      | 15.3 [12.7 to 17.9]                          |                                 |                     |
| Kurtosis                     |                              | Absolute <sup>†</sup>              | -7.47e-01 [-8.95e-01 to -5.99e-01]          | 5.00e-02 ± 4.07e-01 [-3.51e-02 to 1.35e-01]  | 8.47e-01 [7.00e-01 to 9.95e-01]              | 0.99 [0.98 to 0.99]             |                     |
|                              |                              | Percentage <sup>†</sup>            | -17.3 [-20.8 to -13.8]                      | 1.7 ± 9.7 [-0.4 to 3.7]                      | 20.7 [17.1 to 24.2]                          |                                 |                     |
| Gabor <sub>θ=0°,f=2</sub>    |                              | Mean                               | Absolute <sup>†</sup>                       | -1.31e+00 [-1.53e+00 to -1.08e+00]           | -6.65e-02 ± 6.32e-01 [-1.99e-01 to 6.59e-02] | 1.17e+00 [9.43e-01 to 1.40e+00] | 1.00 [1.00 to 1.00] |
|                              |                              |                                    | Percentage <sup>†</sup>                     | -0.9 [-1.0 to -0.7]                          | -0.0 ± 0.4 [-0.1 to 0.0]                     | 0.8 [0.6 to 0.9]                |                     |
|                              | SD                           | Absolute <sup>†</sup>              | -1.32e+00 [-1.56e+00 to -1.09e+00]          | -5.84e-02 ± 6.45e-01 [-1.94e-01 to 7.68e-02] | 1.21e+00 [9.72e-01 to 1.44e+00]              | 0.99 [0.99 to 0.99]             |                     |
|                              |                              | Percentage <sup>†</sup>            | -9.3 [-10.9 to -7.7]                        | -0.5 ± 4.5 [-1.5 to 0.4]                     | 8.2 [6.6 to 9.9]                             |                                 |                     |
|                              | Skewness                     | Absolute <sup>†</sup>              | -2.22e-01 [-2.62e-01 to -1.82e-01]          | -4.81e-03 ± 1.11e-01 [-2.80e-02 to 1.84e-02] | 2.13e-01 [1.72e-01 to 2.53e-01]              | 0.99 [0.98 to 0.99]             |                     |
|                              |                              | Percentage <sup>†</sup>            | -101.6 [-122.7 to -80.5]                    | 12.3 ± 58.1 [0.1 to 24.4]                    | 126.1 [105.1 to 147.2]                       |                                 |                     |
|                              | Kurtosis                     | Absolute <sup>†</sup>              | -1.32e+00 [-1.58e+00 to -1.06e+00]          | 9.77e-02 ± 7.23e-01 [-5.38e-02 to 2.49e-01]  | 1.52e+00 [1.25e+00 to 1.78e+00]              | 0.98 [0.98 to 0.99]             |                     |
|                              |                              | Percentage <sup>†</sup>            | -18.6 [-22.3 to -14.9]                      | 1.2 ± 10.1 [-0.9 to 3.3]                     | 21.0 [17.3 to 24.6]                          |                                 |                     |
|                              | Gabor <sub>θ=30°,f=2</sub>   | Mean                               | Absolute <sup>†</sup>                       | -1.51e+00 [-1.78e+00 to -1.23e+00]           | -3.38e-02 ± 7.51e-01 [-1.91e-01 to 1.24e-01] | 1.44e+00 [1.17e+00 to 1.71e+00] | 1.00 [1.00 to 1.00] |
|                              |                              |                                    | Percentage <sup>†</sup>                     | -1.0 [-1.2 to -0.8]                          | -0.0 ± 0.5 [-0.1 to 0.1]                     | 0.9 [0.8 to 1.1]                |                     |
| SD                           |                              | Absolute <sup>†</sup>              | -1.47e+00 [-1.73e+00 to -1.22e+00]          | -8.40e-02 ± 7.09e-01 [-2.32e-01 to 6.45e-02] | 1.31e+00 [1.05e+00 to 1.56e+00]              | 0.99 [0.98 to 0.99]             |                     |
|                              |                              | Percentage <sup>†</sup>            | -11.4 [-13.4 to -9.4]                       | -0.5 ± 5.6 [-1.7 to 0.7]                     | 10.4 [8.4 to 12.4]                           |                                 |                     |
| Skewness                     |                              | Absolute <sup>†</sup>              | -3.03e-01 [-3.62e-01 to -2.44e-01]          | 1.77e-02 ± 1.64e-01 [-1.66e-02 to 5.20e-02]  | 3.38e-01 [2.79e-01 to 3.98e-01]              | 0.98 [0.96 to 0.98]             |                     |
|                              |                              | Percentage <sup>†</sup>            | -177.9 [-209.7 to -146.1]                   | -6.1 ± 87.6 [-24.5 to 12.2]                  | 165.6 [133.8 to 197.4]                       |                                 |                     |
| Kurtosis                     |                              | Absolute <sup>†</sup>              | -1.12e+00 [-1.33e+00 to -9.17e-01]          | -1.08e-02 ± 5.67e-01 [-1.30e-01 to 1.08e-01] | 1.10e+00 [8.95e-01 to 1.31e+00]              | 0.99 [0.99 to 0.99]             |                     |
|                              |                              | Percentage <sup>†</sup>            | -18.4 [-21.7 to -15.1]                      | -0.4 ± 9.2 [-2.3 to 1.5]                     | 17.6 [14.3 to 21.0]                          |                                 |                     |
| Gabor <sub>θ=45°,f=2</sub>   |                              | Mean                               | Absolute <sup>†</sup>                       | -1.29e+00 [-1.54e+00 to -1.04e+00]           | 6.94e-02 ± 6.95e-01 [-7.60e-02 to 2.15e-01]  | 1.43e+00 [1.18e+00 to 1.68e+00] | 1.00 [1.00 to 1.00] |
|                              |                              |                                    | Percentage <sup>†</sup>                     | -0.9 [-1.1 to -0.7]                          | 0.0 ± 0.5 [-0.1 to 0.1]                      | 1.0 [0.8 to 1.2]                |                     |
|                              | SD                           | Absolute <sup>†</sup>              | -1.69e+00 [-1.99e+00 to -1.39e+00]          | -6.72e-02 ± 8.29e-01 [-2.41e-01 to 1.06e-01] | 1.56e+00 [1.26e+00 to 1.86e+00]              | 0.99 [0.98 to 0.99]             |                     |
|                              |                              | Percentage <sup>†</sup>            | -12.2 [-14.4 to -10.0]                      | -0.3 ± 6.1 [-1.6 to 0.9]                     | 11.6 [9.4 to 13.8]                           |                                 |                     |
|                              | Skewness                     | Absolute <sup>†</sup>              | -3.45e-01 [-4.13e-01 to -2.78e-01]          | 2.10e-02 ± 1.87e-01 [-1.82e-02 to 6.02e-02]  | 3.87e-01 [3.20e-01 to 4.55e-01]              | 0.96 [0.94 to 0.98]             |                     |
|                              |                              | Percentage <sup>†</sup>            | -858.6 [-1033.7 to -683.5]                  | 87.4 ± 482.6 [-13.7 to 188.5]                | 1033.4 [858.3 to 1208.5]                     |                                 |                     |
|                              | Kurtosis                     | Absolute <sup>†</sup>              | -1.21e+00 [-1.41e+00 to -9.99e-01]          | -8.79e-02 ± 5.70e-01 [-2.07e-01 to 3.15e-02] | 1.03e+00 [8.23e-01 to 1.24e+00]              | 0.99 [0.98 to 0.99]             |                     |
|                              |                              | Percentage <sup>†</sup>            | -18.2 [-21.4 to -15.1]                      | -1.2 ± 8.7 [-3.0 to 0.7]                     | 15.9 [12.8 to 19.1]                          |                                 |                     |
|                              | Gabor <sub>θ=90°,f=2</sub>   | Mean                               | Absolute <sup>†</sup>                       | -1.54e+00 [-1.81e+00 to -1.27e+00]           | -8.03e-02 ± 7.44e-01 [-2.36e-01 to 7.55e-02] | 1.38e+00 [1.11e+00 to 1.65e+00] | 1.00 [1.00 to 1.00] |
|                              |                              |                                    | Percentage <sup>†</sup>                     | -1.0 [-1.2 to -0.9]                          | -0.1 ± 0.5 [-0.2 to 0.1]                     | 0.9 [0.8 to 1.1]                |                     |
| SD                           |                              | Absolute <sup>†</sup>              | -1.69e+00 [-2.00e+00 to -1.38e+00]          | -1.20e-02 ± 8.55e-01 [-1.91e-01 to 1.67e-01] | 1.66e+00 [1.35e+00 to 1.97e+00]              | 0.99 [0.98 to 0.99]             |                     |
|                              |                              | Percentage <sup>†</sup>            | -10.4 [-12.4 to -8.5]                       | -0.1 ± 5.3 [-1.2 to 1.0]                     | 10.3 [8.3 to 12.2]                           |                                 |                     |
| Skewness                     |                              | Absolute <sup>†</sup>              | -3.77e-01 [-4.50e-01 to -3.05e-01]          | 1.48e-02 ± 2.00e-01 [-2.71e-02 to 5.68e-02]  | 4.07e-01 [3.35e-01 to 4.80e-01]              | 0.97 [0.96 to 0.98]             |                     |
|                              |                              | Percentage <sup>†</sup>            | -158.4 [-187.4 to -129.4]                   | -1.6 ± 80.0 [-18.3 to 15.2]                  | 155.2 [126.2 to 184.3]                       |                                 |                     |
| Kurtosis                     |                              | Absolute <sup>†</sup>              | -1.10e+00 [-1.31e+00 to -8.87e-01]          | 4.04e-02 ± 5.80e-01 [-8.11e-02 to 1.62e-01]  | 1.18e+00 [9.68e-01 to 1.39e+00]              | 0.99 [0.99 to 0.99]             |                     |
|                              |                              | Percentage <sup>†</sup>            | -15.2 [-18.1 to -12.3]                      | 0.6 ± 8.0 [-1.1 to 2.2]                      | 16.3 [13.4 to 19.2]                          |                                 |                     |
| Gabor <sub>θ=0°,f=2v2</sub>  |                              | Mean                               | Absolute <sup>†</sup>                       | -9.88e-01 [-1.16e+00 to -8.20e-01]           | -7.90e-02 ± 4.64e-01 [-1.76e-01 to 1.81e-02] | 8.30e-01 [6.62e-01 to 9.99e-01] | 1.00 [1.00 to 1.00] |
|                              |                              |                                    | Percentage <sup>†</sup>                     | -0.7 [-0.8 to -0.6]                          | -0.1 ± 0.3 [-0.1 to 0.0]                     | 0.6 [0.5 to 0.7]                |                     |
|                              | SD                           | Absolute <sup>†</sup>              | -9.83e-01 [-1.16e+00 to -8.09e-01]          | -4.25e-02 ± 4.80e-01 [-1.43e-01 to 5.81e-02] | 8.98e-01 [7.24e-01 to 1.07e+00]              | 0.99 [0.99 to 1.00]             |                     |
|                              |                              | Percentage <sup>†</sup>            | -7.7 [-9.0 to -6.3]                         | -0.5 ± 3.7 [-1.2 to 0.3]                     | 6.7 [5.4 to 8.1]                             |                                 |                     |
|                              | Skewness                     | Absolute <sup>†</sup>              | -1.61e-01 [-1.91e-01 to -1.31e-01]          | 4.04e-04 ± 8.23e-02 [-1.68e-02 to 1.76e-02]  | 1.62e-01 [1.32e-01 to 1.92e-01]              | 0.99 [0.99 to 1.00]             |                     |
|                              |                              | Percentage <sup>†</sup>            | -174.5 [-204.2 to -144.8]                   | -14.2 ± 81.8 [-31.3 to 3.0]                  | 146.2 [116.5 to 175.8]                       |                                 |                     |
|                              | Kurtosis                     | Absolute <sup>†</sup>              | -1.31e+00 [-1.57e+00 to -1.05e+00]          | 1.02e-01 ± 7.19e-01 [-4.82e-02 to 2.53e-01]  | 1.51e+00 [1.25e+00 to 1.77e+00]              | 0.99 [0.99 to 1.00]             |                     |
|                              |                              | Percentage <sup>†</sup>            | -18.6 [-22.2 to -14.9]                      | 1.0 ± 10.0 [-1.1 to 3.1]                     | 20.5 [16.9 to 24.1]                          |                                 |                     |
|                              | Gabor <sub>θ=30°,f=2v2</sub> | Mean                               | Absolute <sup>†</sup>                       | -1.20e+00 [-1.40e+00 to -9.90e-01]           | -7.83e-02 ± 5.71e-01 [-1.98e-01 to 4.12e-02] | 1.04e+00 [8.33e-01 to 1.25e+00] | 1.00 [1.00 to 1.00] |
|                              |                              |                                    | Percentage <sup>†</sup>                     | -0.8 [-1.0 to -0.7]                          | -0.1 ± 0.4 [-0.1 to 0.0]                     | 0.7 [0.6 to 0.9]                |                     |
| SD                           |                              | Absolute <sup>†</sup>              | -1.08e+00 [-1.26e+00 to -8.92e-01]          | -8.35e-02 ± 5.06e-01 [-1.90e-01 to 2.25e-02] | 9.09e-01 [7.25e-01 to 1.09e+00]              | 0.99 [0.99 to 0.99]             |                     |
|                              |                              | Percentage <sup>†</sup>            | -9.3 [-10.9 to -7.7]                        | -0.7 ± 4.4 [-1.6 to 0.2]                     | 7.9 [6.3 to 9.5]                             |                                 |                     |
| Skewness                     |                              | Absolute <sup>†</sup>              | -2.43e-01 [-2.93e-01 to -1.94e-01]          | 2.47e-02 ± 1.37e-01 [-3.96e-03 to 5.33e-02]  | 2.93e-01 [2.43e-01 to 3.42e-01]              | 0.97 [0.96 to 0.98]             |                     |
|                              |                              | Percentage <sup>†</sup>            | -203.4 [-241.9 to -164.8]                   | 4.8 ± 106.2 [-17.5 to 27.0]                  | 212.9 [174.4 to 251.4]                       |                                 |                     |
| Kurtosis                     |                              | Absolute <sup>†</sup>              | -1.75e+00 [-2.06e+00 to -1.44e+00]          | -5.69e-02 ± 8.63e-01 [-2.38e-01 to 1.24e-01] | 1.63e+00 [1.32e+00 to 1.95e+00]              | 0.98 [0.98 to 0.99]             |                     |
|                              |                              | Percentage <sup>†</sup>            | -21.2 [-25.0 to -17.4]                      | -0.6 ± 10.5 [-2.8 to 1.6]                    | 20.1 [16.3 to 23.9]                          |                                 |                     |
| Gabor <sub>θ=45°,f=2v2</sub> |                              | Mean                               | Absolute <sup>†</sup>                       | -1.08e+00 [-1.28e+00 to -8.79e-01]           | 1.36e-02 ± 5.59e-01 [-1.03e-01 to 1.31e-01]  | 1.11e+00 [9.06e-01 to 1.31e+00] | 1.00 [1.00 to 1.00] |
|                              |                              |                                    | Percentage <sup>†</sup>                     | -0.8 [-0.9 to -0.6]                          | 0.0 ± 0.4 [-0.1 to 0.1]                      | 0.8 [0.7 to 0.9]                |                     |
|                              | SD                           | Absolute <sup>†</sup>              | -1.36e+00 [-1.59e+00 to -1.12e+00]          | -8.13e-02 ± 6.50e-01 [-2.17e-01 to 5.48e-02] | 1.19e+00 [9.57e-01 to 1.43e+00]              | 0.99 [0.98 to 0.99]             |                     |
|                              |                              | Percentage <sup>†</sup>            | -11.1 [-13.0 to -9.1]                       | -0.6 ± 5.3 [-1.8 to 0.5]                     | 9.8 [7.9 to 11.7]                            |                                 |                     |
|                              | Skewness                     | Absolute <sup>†</sup>              | -3.20e-01 [-3.83e-01 to -2.57e-01]          | 1.98e-02 ± 1.73e-01 [-1.65e-02 to 5.61e-02]  | 3.60e-01 [2.97e-01 to 4.23e-01]              | 0.96 [0.94 to 0.98]             |                     |
|                              |                              | Percentage <sup>†</sup>            | -614.5 [-732.9 to -496.1]                   | 25.1 ± 326.3 [-43.3 to 93.4]                 | 664.7 [546.3 to 783.1]                       |                                 |                     |
|                              | Kurtosis                     | Absolute <sup>†</sup>              | -1.66e+00 [-1.96e+00 to -1.35e+00]          | -9.23e-03 ± 8.41e-01 [-1.85e-01 to 1.67e-01] | 1.64e+00 [1.33e+00 to 1.94e+00]              | 0.98 [0.97 to 0.99]             |                     |
|                              |                              | Percentage <sup>†</sup>            | -21.9 [-25.9 to -17.9]                      | -0.3 ± 11.0 [-2.7 to 2.0]                    | 21.2 [17.2 to 25.2]                          |                                 |                     |
|                              | Gabor <sub>θ=90°,f=2v2</sub> | Mean                               | Absolute <sup>†</sup>                       | -1.38e+00 [-1.62e+00 to -1.14e+00]           | -8.80e-02 ± 6.60e-01 [-2.26e-01 to 5.03e-02] | 1.21e+00 [9.67e-01 to 1.45e+00] | 1.00 [1.00 to 1.00] |
|                              |                              |                                    | Percentage <sup>†</sup>                     | -1.0 [-1.2 to -0.9]                          | -0.1 ± 0.5 [-0.2 to 0.0]                     | 0.9 [0.7 to 1.1]                |                     |
| SD                           |                              | Absolute <sup>†</sup>              | -1.53e+00 [-1.81e+00 to -1.26e+00]          | -4.57e-02 ± 7.60e-01 [-2.05e-01 to 1.13e-01] | 1.44e+00 [1.17e+00 to 1.72e+00]              | 0.98 [0.98 to 0.99]             |                     |
|                              |                              | Percentage <sup>†</sup>            | -9.9 [-11.7 to -8.1]                        | -0.3 ± 4.9 [-1.3 to 0.7]                     | 9.3 [7.5 to 11.0]                            |                                 |                     |
| Skewness                     |                              | Absolute <sup>†</sup>              | -3.18e-01 [-3.78e-01 to -2.59e-01]          | 1.46e-03 ± 1.63e-01 [-3.27e-02 to 3.56e-02]  | 3.21e-01 [2.62e-01 to 3.81e-01]              | 0.97 [0.96 to 0.98]             |                     |
|                              |                              | Percentage <sup>†</sup>            | -103.5 [-125.1 to -81.9]                    | 13.2 ± 59.5 [0.7 to 25.7]                    | 129.9 [108.3 to 151.5]                       |                                 |                     |
| Kurtosis                     |                              | Absolute <sup>†</sup>              | -1.47e+                                     |                                              |                                              |                                 |                     |



| Semi-automatic rater 1 vs. rater 2 |                         |                         |                                    |                                               |                                 |                     |
|------------------------------------|-------------------------|-------------------------|------------------------------------|-----------------------------------------------|---------------------------------|---------------------|
| Feature category                   | Feature Name            | Differences             | LRL [95% CI]                       | Mean ± SD [95%]                               | URL [95%]                       | ICC [95% CI]        |
| Shape                              | Surface area            | Absolute <sup>†</sup>   | -5.82e+01 [-6.99e+01 to -4.65e+01] | 4.97e+00 ± 3.22e+01 [-1.78e+00 to 1.17e+01]   | 6.81e+01 [5.64e+01 to 7.98e+01] | 0.95 [0.92 to 0.97] |
|                                    |                         | Percentage <sup>†</sup> | -40.8 [-49.3 to -32.3]             | 5.1 ± 23.4 [0.2 to 10.1]                      | 51.1 [42.6 to 59.6]             |                     |
|                                    | Volume                  | Absolute <sup>†</sup>   | -2.97e-01 [-3.52e-01 to -2.42e-01] | -7.19e-05 ± 1.52e-01 [-3.18e-02 to 3.17e-02]  | 2.97e-01 [2.42e-01 to 3.52e-01] | 0.96 [0.94 to 0.98] |
|                                    |                         | Percentage <sup>†</sup> | -51.5 [-62.5 to -40.4]             | 8.2 ± 30.4 [1.8 to 14.6]                      | 67.8 [56.8 to 78.9]             |                     |
|                                    | Compactness v1          | Absolute <sup>†</sup>   | -3.93e-03 [-4.66e-03 to -3.20e-03] | 1.42e-05 ± 2.01e-03 [-4.08e-04 to 4.36e-04]   | 3.96e-03 [3.23e-03 to 4.69e-03] | 0.90 [0.85 to 0.93] |
|                                    |                         | Percentage <sup>†</sup> | -22.2 [-26.4 to -18.1]             | 0.1 ± 11.4 [-2.3 to 2.5]                      | 22.5 [18.3 to 26.6]             |                     |
|                                    | Compactness v2          | Absolute <sup>†</sup>   | -1.60e-01 [-1.89e-01 to -1.30e-01] | 8.33e-05 ± 8.16e-02 [-1.70e-02 to 1.72e-02]   | 1.60e-01 [1.30e-01 to 1.90e-01] | 0.89 [0.84 to 0.93] |
|                                    |                         | Percentage <sup>†</sup> | -43.2 [-51.3 to -35.2]             | 0.3 ± 22.2 [-4.4 to 4.9]                      | 43.8 [35.8 to 51.9]             |                     |
|                                    | Spherical disproportion | Absolute <sup>†</sup>   | -2.22e-01 [-2.63e-01 to -1.81e-01] | -9.42e-04 ± 1.13e-01 [-2.45e-02 to 2.26e-02]  | 2.20e-01 [1.79e-01 to 2.61e-01] | 0.91 [0.87 to 0.94] |
|                                    |                         | Percentage <sup>†</sup> | -15.1 [-17.8 to -12.3]             | -0.1 ± 7.6 [-1.7 to 1.5]                      | 14.9 [12.1 to 17.7]             |                     |
|                                    | Sphericity              | Absolute <sup>†</sup>   | -1.04e-01 [-1.24e-01 to -8.49e-02] | 4.48e-04 ± 5.34e-02 [-1.07e-02 to 1.16e-02]   | 1.05e-01 [8.57e-02 to 1.24e-01] | 0.90 [0.85 to 0.93] |
|                                    |                         | Percentage <sup>†</sup> | -14.9 [-17.7 to -12.1]             | 0.1 ± 7.6 [-1.5 to 1.7]                       | 15.1 [12.3 to 17.8]             |                     |
|                                    | Surface to volume ratio | Absolute <sup>†</sup>   | -4.13e-01 [-4.80e-01 to -3.46e-01] | -4.95e-02 ± 1.85e-01 [-8.84e-02 to -1.07e-02] | 3.14e-01 [2.47e-01 to 3.81e-01] | 0.96 [0.93 to 0.97] |
|                                    |                         | Percentage <sup>†</sup> | -22.9 [-26.6 to -19.2]             | -2.7 ± 10.3 [-4.9 to -0.6]                    | 17.5 [13.7 to 21.2]             |                     |

† Difference are not normally distributed: Shapiro-Wilk p-value<0.05

LRL: Lower Reliability Limit; URL: Upper reliability Limit

**Supplementary Table 5:** Reliability results of the shape features obtained using using semi-automatic segmentation with raters 1 and 2.

| Interactive with manual corrections (I <sub>MC</sub> ) rater 1 vs. rater 2 |                         |                         |                                    |                                               |                                 |                     |
|----------------------------------------------------------------------------|-------------------------|-------------------------|------------------------------------|-----------------------------------------------|---------------------------------|---------------------|
| Feature category                                                           | Feature Name            | Differences             | LRL [95% CI]                       | Mean ± SD [95%]                               | URL [95%]                       | ICC [95% CI]        |
| Shape                                                                      | Surface area            | Absolute <sup>†</sup>   | -3.69e+01 [-4.44e+01 to -2.94e+01] | 3.49e+00 ± 2.06e+01 [-8.27e-01 to 7.80e+00]   | 4.39e+01 [3.64e+01 to 5.13e+01] | 0.98 [0.96 to 0.98] |
|                                                                            |                         | Percentage <sup>†</sup> | -28.1 [-33.9 to -22.3]             | 3.0 ± 15.9 [-0.3 to 6.4]                      | 34.2 [28.4 to 40.0]             |                     |
|                                                                            | Volume                  | Absolute <sup>†</sup>   | -2.70e+01 [-3.21e+01 to -2.20e+01] | 3.36e-01 ± 1.40e+01 [-2.59e+00 to 3.26e+00]   | 2.77e+01 [2.26e+01 to 3.28e+01] | 0.99 [0.98 to 0.99] |
|                                                                            |                         | Percentage <sup>†</sup> | -40.6 [-48.4 to -32.8]             | 1.5 ± 21.5 [-3.0 to 6.0]                      | 43.7 [35.9 to 51.5]             |                     |
|                                                                            | Compactness v1          | Absolute <sup>†</sup>   | -3.38e-03 [-3.92e-03 to -2.84e-03] | -4.59e-04 ± 1.49e-03 [-7.71e-04 to -1.47e-04] | 2.46e-03 [1.92e-03 to 3.00e-03] | 0.93 [0.89 to 0.96] |
|                                                                            |                         | Percentage <sup>†</sup> | -19.5 [-22.7 to -16.3]             | -2.2 ± 8.8 [-4.1 to -0.4]                     | 15.1 [11.9 to 18.3]             |                     |
|                                                                            | Compactness v2          | Absolute <sup>†</sup>   | -1.39e-01 [-1.60e-01 to -1.17e-01] | -2.08e-02 ± 6.01e-02 [-3.34e-02 to -8.26e-03] | 9.70e-02 [7.52e-02 to 1.19e-01] | 0.94 [0.89 to 0.96] |
|                                                                            |                         | Percentage <sup>†</sup> | -38.5 [-44.8 to -32.2]             | -4.4 ± 17.4 [-8.0 to -0.8]                    | 29.6 [23.3 to 35.9]             |                     |
|                                                                            | Spherical disproportion | Absolute <sup>†</sup>   | -1.62e-01 [-1.95e-01 to -1.28e-01] | 1.84e-02 ± 9.18e-02 [-8.28e-04 to 3.76e-02]   | 1.98e-01 [1.65e-01 to 2.32e-01] | 0.91 [0.87 to 0.94] |
|                                                                            |                         | Percentage <sup>†</sup> | -10.1 [-12.2 to -8.0]              | 1.5 ± 5.9 [0.2 to 2.7]                        | 13.1 [10.9 to 15.2]             |                     |
|                                                                            | Sphericity              | Absolute <sup>†</sup>   | -8.97e-02 [-1.04e-01 to -7.53e-02] | -1.16e-02 ± 3.99e-02 [-1.99e-02 to -3.23e-03] | 6.66e-02 [5.21e-02 to 8.10e-02] | 0.93 [0.89 to 0.96] |
|                                                                            |                         | Percentage <sup>†</sup> | -13.0 [-15.2 to -10.9]             | -1.5 ± 5.9 [-2.7 to -0.2]                     | 10.1 [8.0 to 12.2]              |                     |
|                                                                            | Surface to volume ratio | Absolute <sup>†</sup>   | -2.93e-01 [-3.47e-01 to -2.38e-01] | 2.21e-03 ± 1.50e-01 [-2.93e-02 to 3.37e-02]   | 2.97e-01 [2.43e-01 to 3.52e-01] | 0.96 [0.94 to 0.97] |
|                                                                            |                         | Percentage <sup>†</sup> | -16.9 [-20.1 to -13.6]             | 0.7 ± 8.9 [-1.2 to 2.5]                       | 18.2 [14.9 to 21.4]             |                     |

† Difference are not normally distributed: Shapiro-Wilk p-value<0.05

LRL: Lower Reliability Limit; URL: Upper reliability Limit

**Supplementary Table 6:** Reliability results of the shape features obtained using interactive + manual corrections segmentation (I<sub>MC</sub>) with rater 1 and 2.
